# Supplementary material for: PYK2 senses calcium through a disordered dimerization and calmodulin-binding element
Source: Springer Nature journal article supplement (doi:10.1038/s42003-022-03760-8), 2022-08-09
Supplement: MOESM2 [file 42003_2022_3760_MOESM2_ESM.pdf]

## Supplementary Figures

### **PYK2 senses calcium through a disordered dimerization and calmodulin-binding element**

Afaque A. Momin<sup>1</sup>, Tiago Mendes<sup>2#</sup>, Philippe Barthe<sup>3#</sup>, Camille Faure<sup>2</sup>, SeungBeom Hong<sup>1</sup>, Piao Yu<sup>1</sup>, Gress Kadaré<sup>2</sup>, Mariusz Jaremko<sup>4</sup>, Jean-Antoine Girault<sup>2</sup>, Łukasz Jaremko<sup>4</sup>, Stefan T. Arold<sup>\*1,3</sup>

<sup>1</sup>King Abdullah University of Science and Technology (KAUST), Computational Bioscience Research Center (CBRC), Division of Biological and Environmental Science and Engineering (BESE), Thuwal, 23955-6900, Saudi Arabia

<sup>2</sup>Inserm UMR-S 1270, Sorbonne Université, Faculty of Sciences and Engineering, Institut du Fer à Moulin. Paris, 75005, France

<sup>3</sup>Centre de Biologie Structurale (CBS), University Montpellier, INSERM U1054, CNRS UMR 5048, F-34090, Montpellier, France

<sup>4</sup>King Abdullah University of Science and Technology (KAUST), Division of Biological and Environmental Science and Engineering (BESE), Thuwal, 23955-6900, Saudi Arabia

#contributed equally

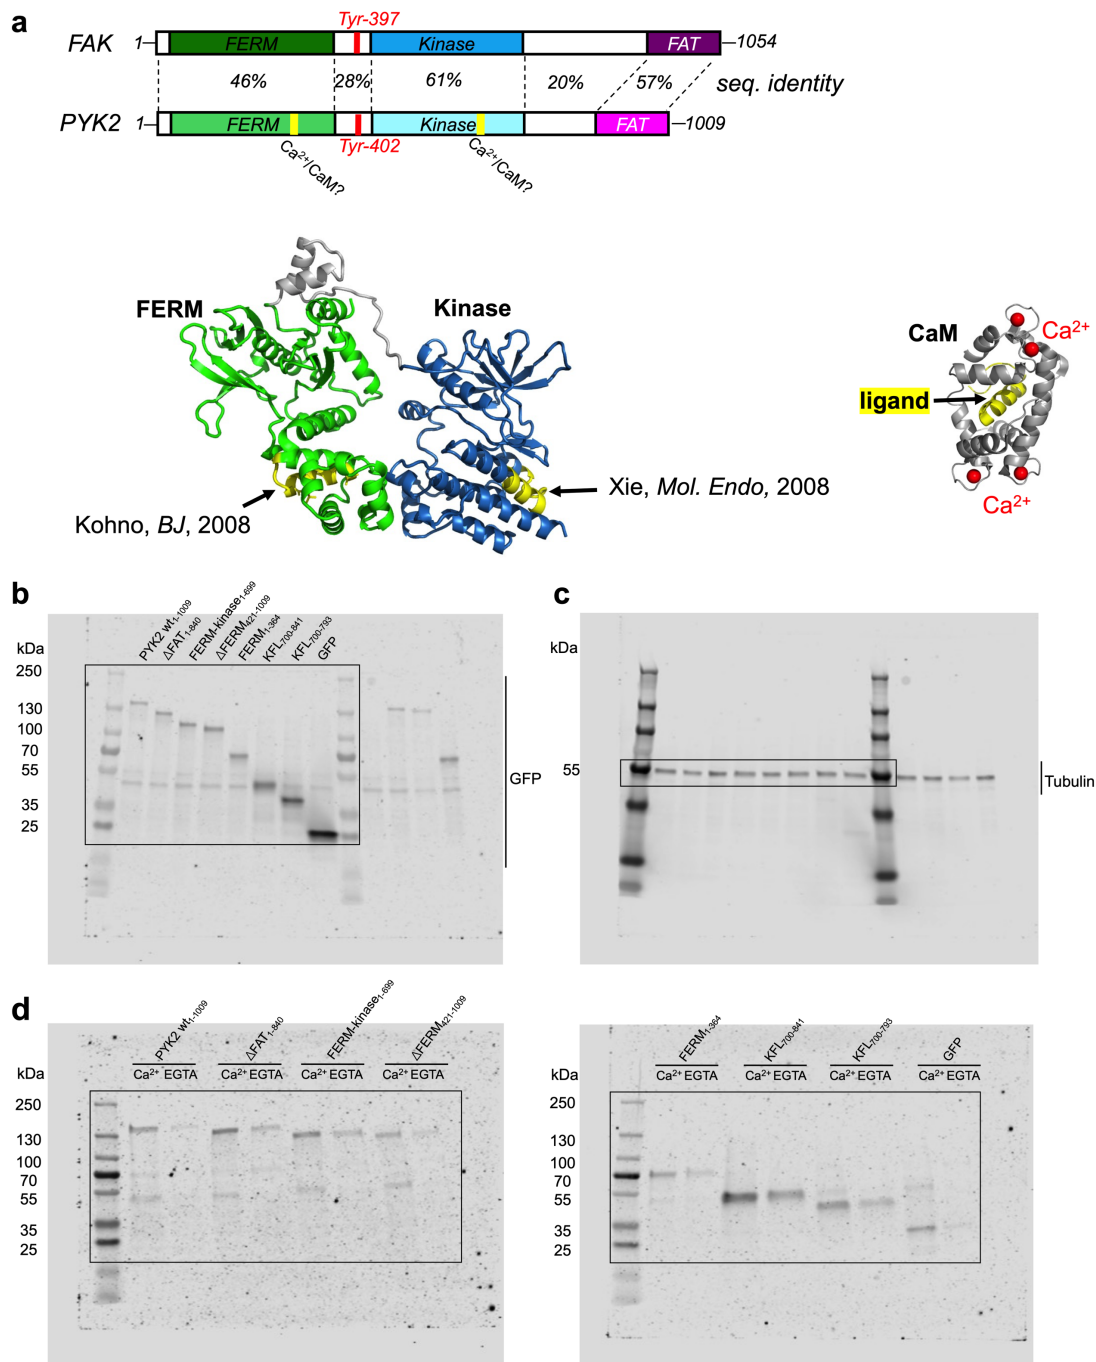

**Supplementary Figure 1: (a) Proposed non-KFL-specific CaM interactions.** (a) Top: Schematic overview of FAK and PYK2, showing their domain structure and sequence identity. The localization of the previously proposed  $\text{Ca}^{2+}/\text{CaM}$  binding motifs is indicated in yellow. Bottom, left: Position of the previously proposed  $\text{Ca}^{2+}/\text{CaM}$  binding motifs (coloured in yellow) within the three-dimensional structures of the FERM domain (green, as proposed by Kohno et al.<sup>1</sup>) and kinase domain (blue; as proposed by Xie et al.<sup>2</sup>). Bottom, right: In these locations, the proposed  $\text{Ca}^{2+}/\text{CaM}$  binding motifs would not be able to associate with CaM in a canonical way, where calcium (red)-bound CaM (gray) wraps around the helical ligand (yellow). Uncropped images of the representative immunoblot of input fractions of the indicated GFP-tagged PYK2 constructs immunolabeled with (b) GFP and (c) tubulin antibodies as shown in Fig. 1b. (d) Uncropped images of representative GFP immunoblot of GFP-PYK2 constructs associated with the CaM Sepharose beads as shown in Fig 1c. Boxed areas represent the cropped part of the immunoblots.

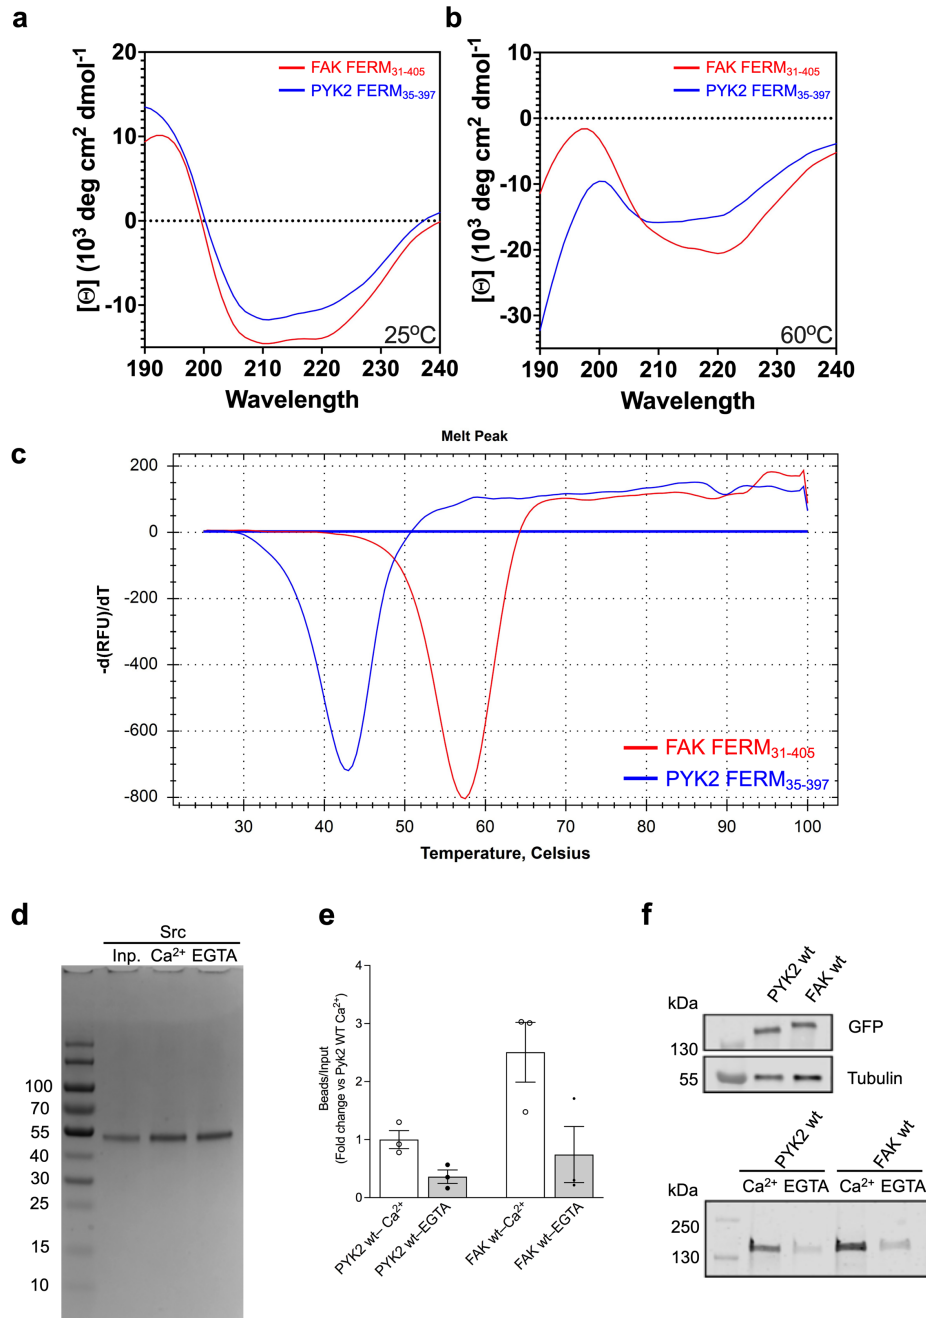

**Supplementary Figure 2. CaM agarose bead assays and associated experiments.** Circular Dichroism (CD) spectra for FAK FERM<sub>31-405</sub> and PYK2 FERM<sub>35-397</sub> at **(a)** 25 °C and **(b)** 60 °C. **(c)** Differential scanning fluorimetry (DSF) curve for FAK FERM<sub>31-405</sub> (melting temperature,  $T_m = 57.8$  °C) and PYK2 FERM<sub>35-397</sub> ( $T_m = 43.4$  °C). **(d)** CaM agarose bead assay using recombinant and purified Src. Bands correspond to Src retained by the CaM beads in the presence ( $\text{Ca}^{2+}$ ) or absence (EGTA) of  $\text{Ca}^{2+}$ . Inp.: input. The  $M_w$  of the markers are given in kDa. **(e)** CaM agarose bead assay using cell lysates. Graphical representation of GFP densitometry in beads normalized by input, presented as fold change with respect to PYK2 WT  $\text{Ca}^{2+}$  bead fraction. Bars correspond to the mean of 3 independent experiments,  $\pm$  SEM. **(f)** *Top*: Representative image of input fractions immunolabeled for GFP tagged full-length PYK2 and FAK constructs and tubulin. *Bottom*: Representative image of bead fractions immunolabelled for full-length PYK2 and FAK. Binding experiments are represented as (mean  $\pm$  SD,  $n=3$ ).





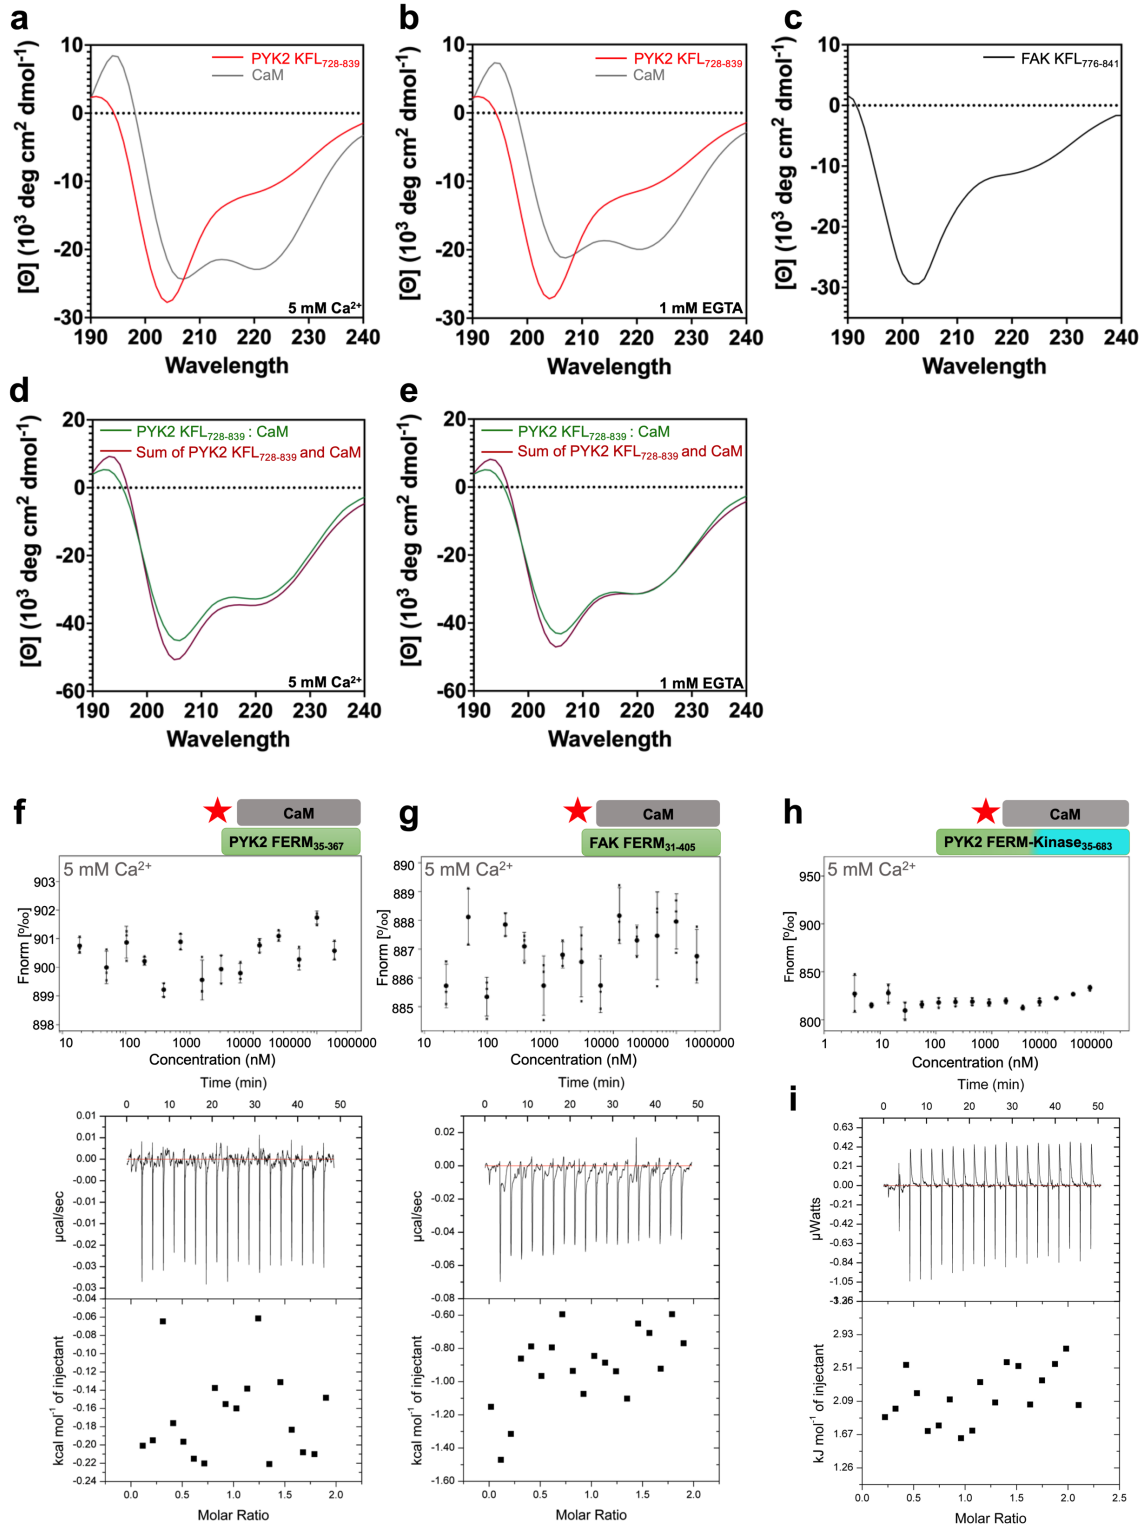

**Supplementary Figure 5. Biophysical analysis of PYK2 and FAK KFL.** CD spectra of PYK2 KFL<sub>728-839</sub> and CaM in the presence (a), and in the absence (b) of Ca<sup>2+</sup>. (c) CD spectrum of FAK KFL<sub>776-841</sub>. CD spectra of PYK2 KFL<sub>728-839</sub> : CaM complex in the presence (d) and absence (e) of Ca<sup>2+</sup> overlapped on the sum of the individual spectra of PYK2 KFL<sub>728-839</sub> and CaM shown in (a) and (b). MST and ITC experiments probing the association of Ca<sup>2+</sup>/CaM with FERM domains of (f) PYK2 and (g) FAK. (h) MST experiment testing binding of the PYK2 FERM-kinase fragment with Ca<sup>2+</sup>/CaM. The red star indicates the fluorescently labelled protein. (i) ITC experiment probing the interaction of PYK2 KFL<sub>728-839</sub> with calcium. Binding experiments are represented as (mean ± SD, n=3).

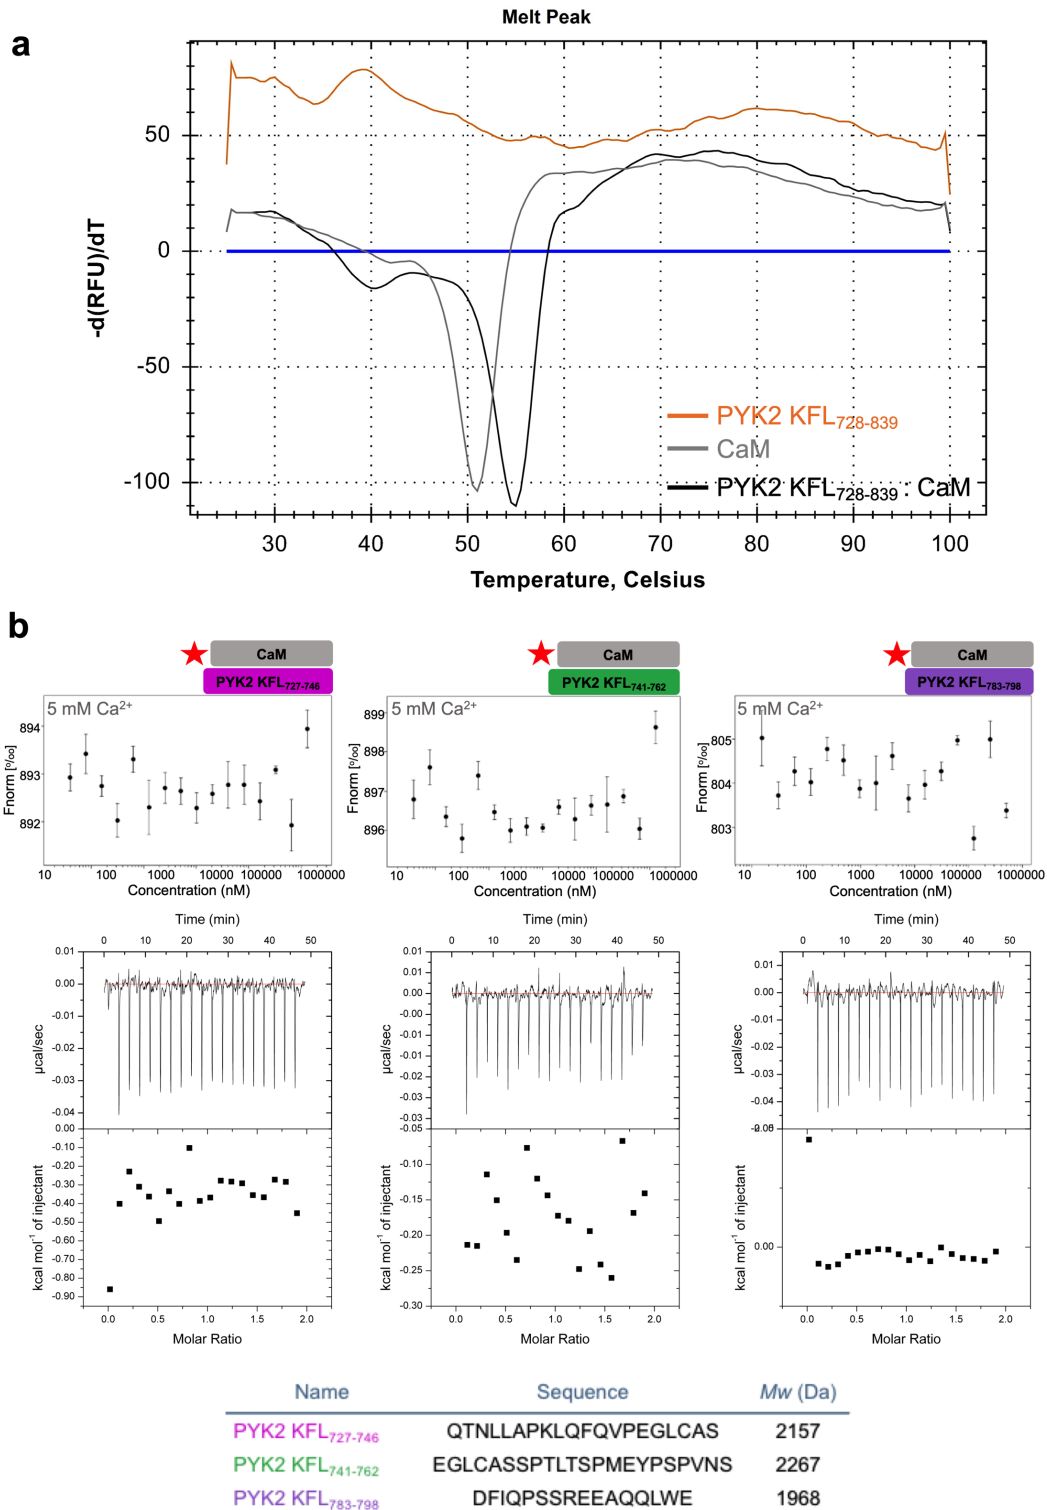

**Supplementary Figure 6. Biophysical analysis of PYK2 KFL and CaM.** (a) Differential scanning fluorimetry (DSF) curve, recorded in the absence of  $\text{Ca}^{2+}$ , for PYK2 KFL<sub>728-839</sub> alone (orange), CaM alone (gray) and CaM in the presence of PYK2 KFL<sub>728-839</sub>. (b) Probing the capability of PYK2 KFL-derived peptide motifs to associated with CaM. *Top*: MST and ITC binding curves testing binding of synthesized peptides covering the bioinformatically identified CaM binding motifs within PYK2 KFL<sub>728-839</sub>. Red star indicates labelled protein. *Bottom*: Sequence and molecular weight of the peptides used. Binding experiments are represented as (mean  $\pm$  SD, n=3).

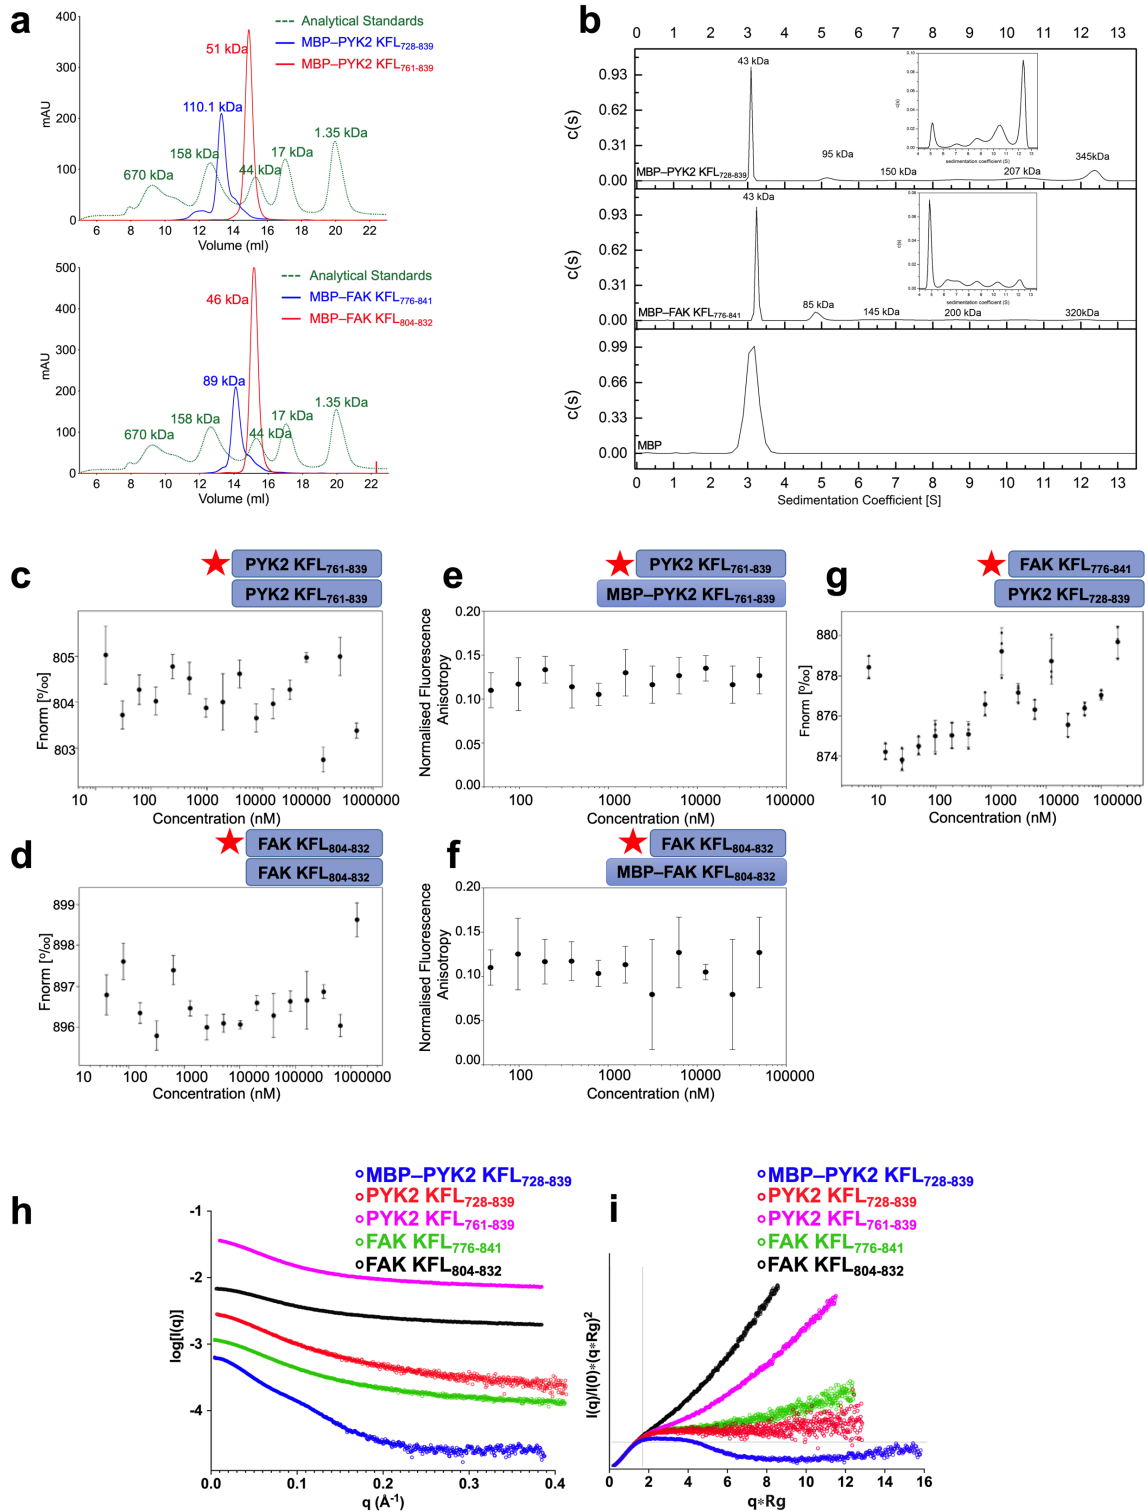

**Supplementary Figure 7: Biophysical assays testing the dimerization and structural features of KFL fragments from PYK2 and FAK. (a)** SEC elution profiles. Mw of KFL constructs and of the analytical standards are given. **(b)** Analysis of AUC sedimentation velocity data. **(c,d)** MST and **(e,f)** fluorescence anisotropy studies of KFL fragments that fail to show dimerization. **(g)** MST study between PYK2 KFL<sub>728-839</sub> and FAK KFL<sub>776-841</sub> that fail to show interaction. The red star indicates the labelled protein. **(h)** SEC-SAXS profiles and **(i)** KRATKY plots derived from **(h)**. Binding experiments are represented as (mean ± SD, n=3).

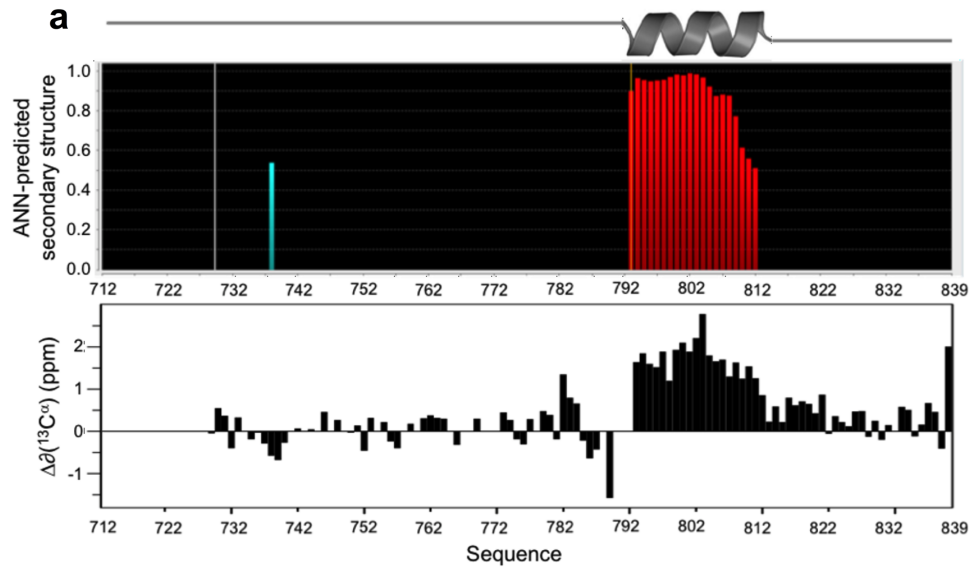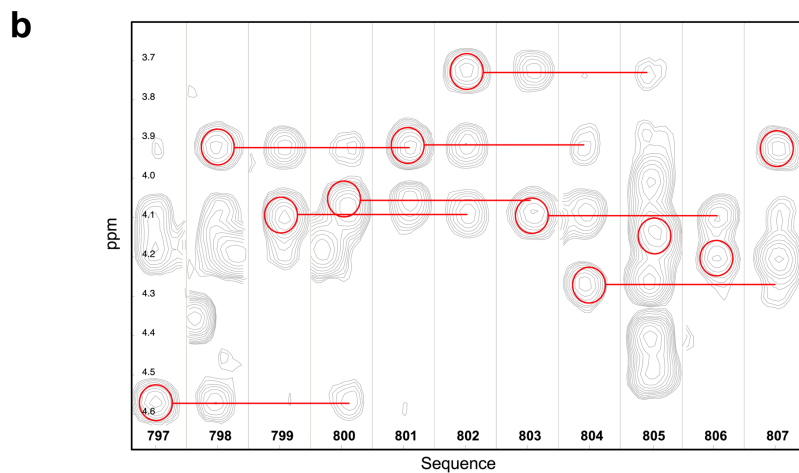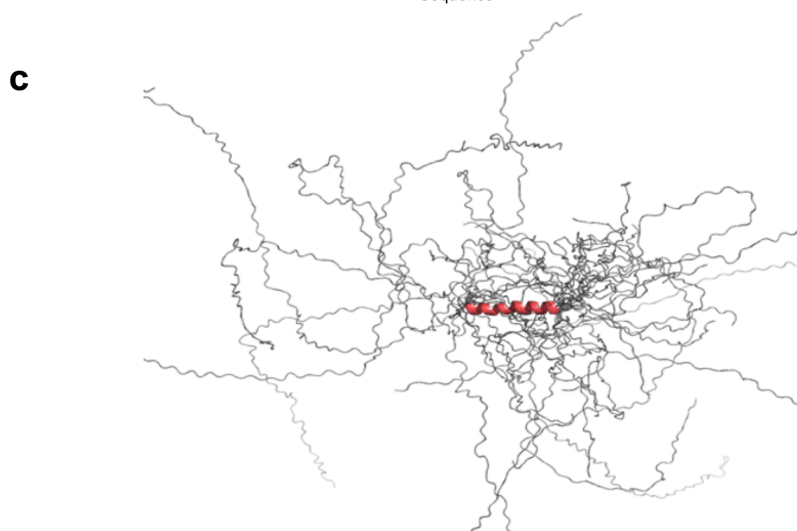

**Supplementary Figure 8. NMR analysis of PYK2 KFL<sub>728-839</sub>.** **(a)** Secondary structure derived from Artificial Neural Network (ANN) prediction by TALOS-N (<https://spin.niddk.nih.gov/bax/software/TALOS-N/>;<sup>9</sup> using the backbone ( $^{13}\text{C}^\alpha$ ,  $^{13}\text{C}'$ ,  $^{15}\text{N}$ ,  $^1\text{H}^\alpha$  and  $^1\text{H}^\text{N}$ ) and  $^{13}\text{C}^\beta$  chemical shift assignments. **(b)** Extract from NOESY (150 ms) strip plot. The strips are ordered according to the sequence. The contacts  $i$ ,  $i+3$  of the  $\text{H}^\alpha$  (red circle) with the  $\text{H}^\text{N}$  are shown by red lines. **(c)** 3D structures of the PYK2 KFL<sub>728-839</sub>. The helical region is shown in pink.

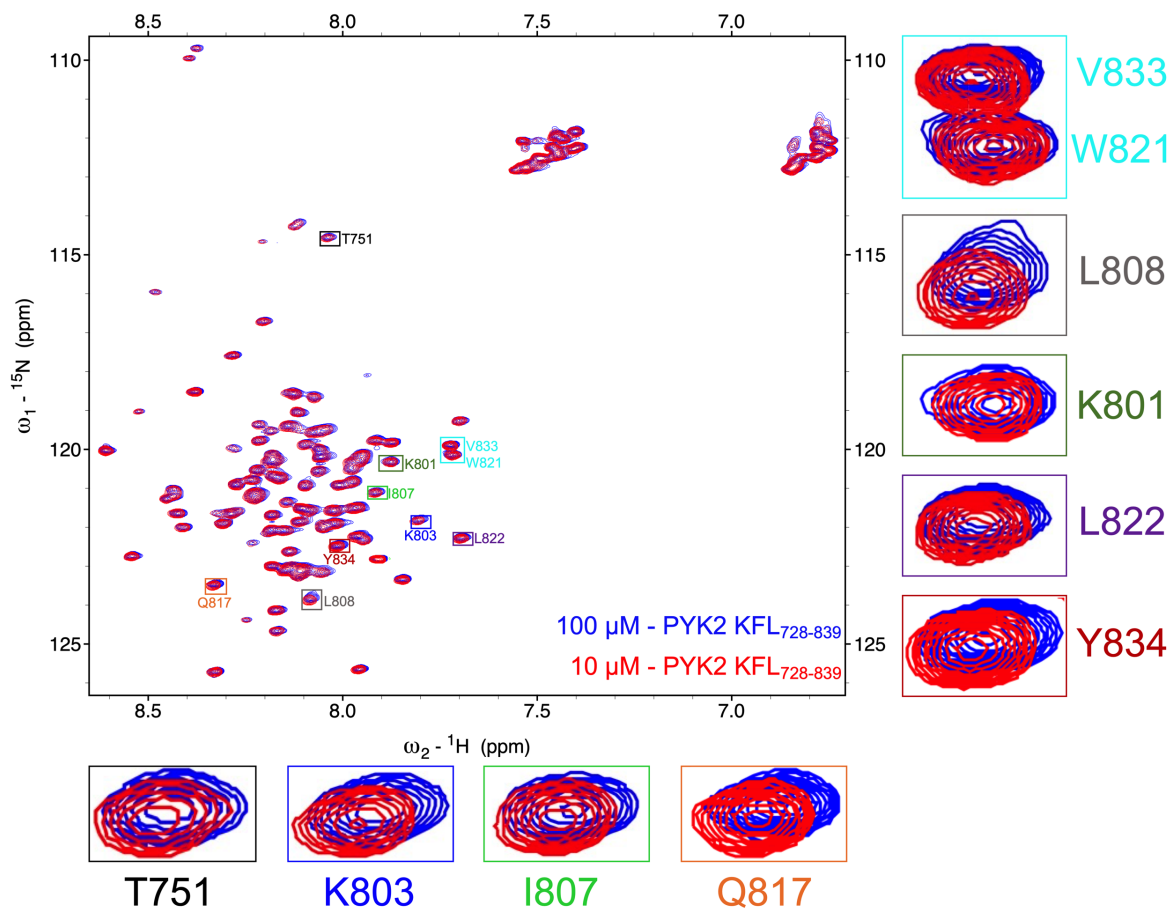

**Supplementary Figure 9.** [ $^1\text{H}$ ,  $^{15}\text{N}$ ] HSQC overlay for [ $^{13}\text{C}$ ,  $^{15}\text{N}$ ] PYK2 KFL<sub>728-839</sub> at 100  $\mu\text{M}$  (blue) and 10  $\mu\text{M}$  (red) to analyse CSPs upon changes in the monomer:dimer ratio. To support that CSPs were not simply a general result of small changes in temperature or pH, we also displayed two peaks that did not move upon dilution (K801 and W821).

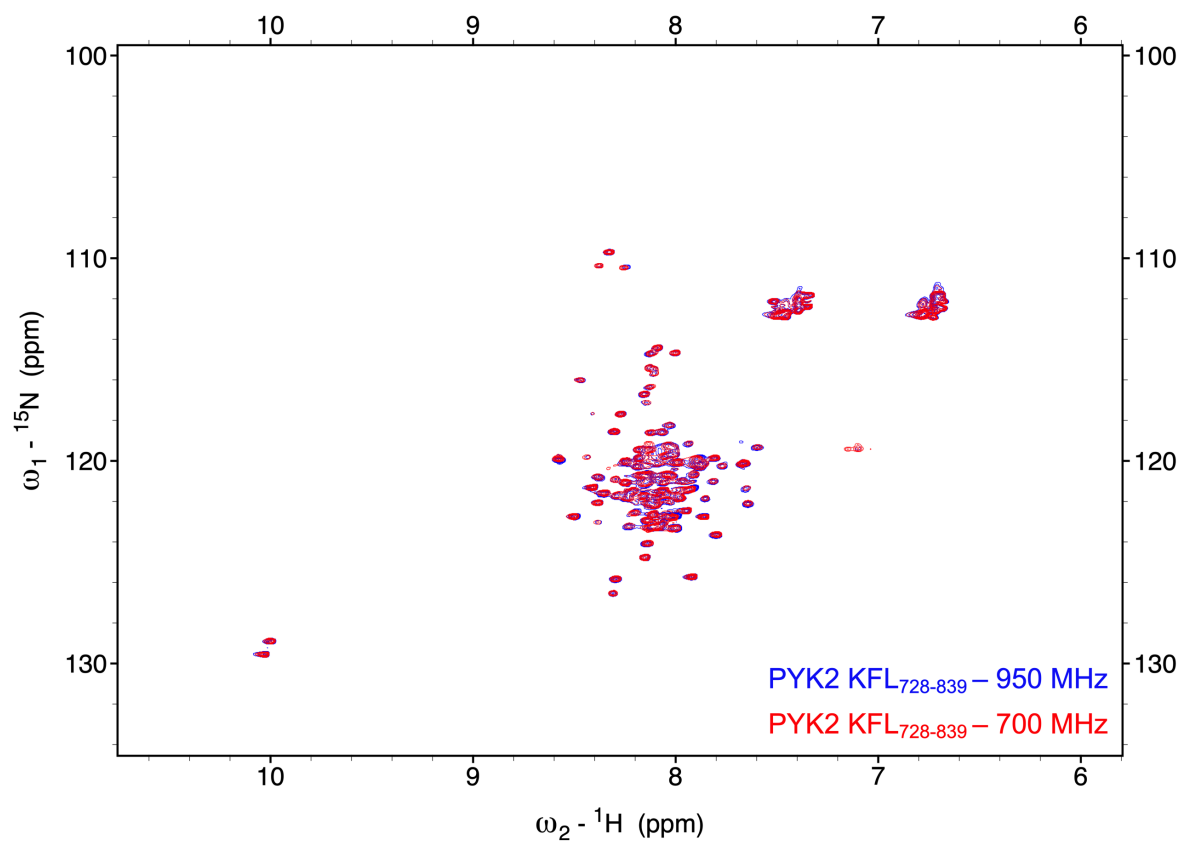

**Supplementary Figure 10.** [ ${}^1\text{H}$ ,  ${}^{15}\text{N}$ ] HSQC overlay for [ ${}^{13}\text{C}$ ,  ${}^{15}\text{N}$ ] PYK2 KFL<sub>728-839</sub> at 100  $\mu\text{M}$  concentration measured at 950 MHz (blue) and 700 MHz (red).

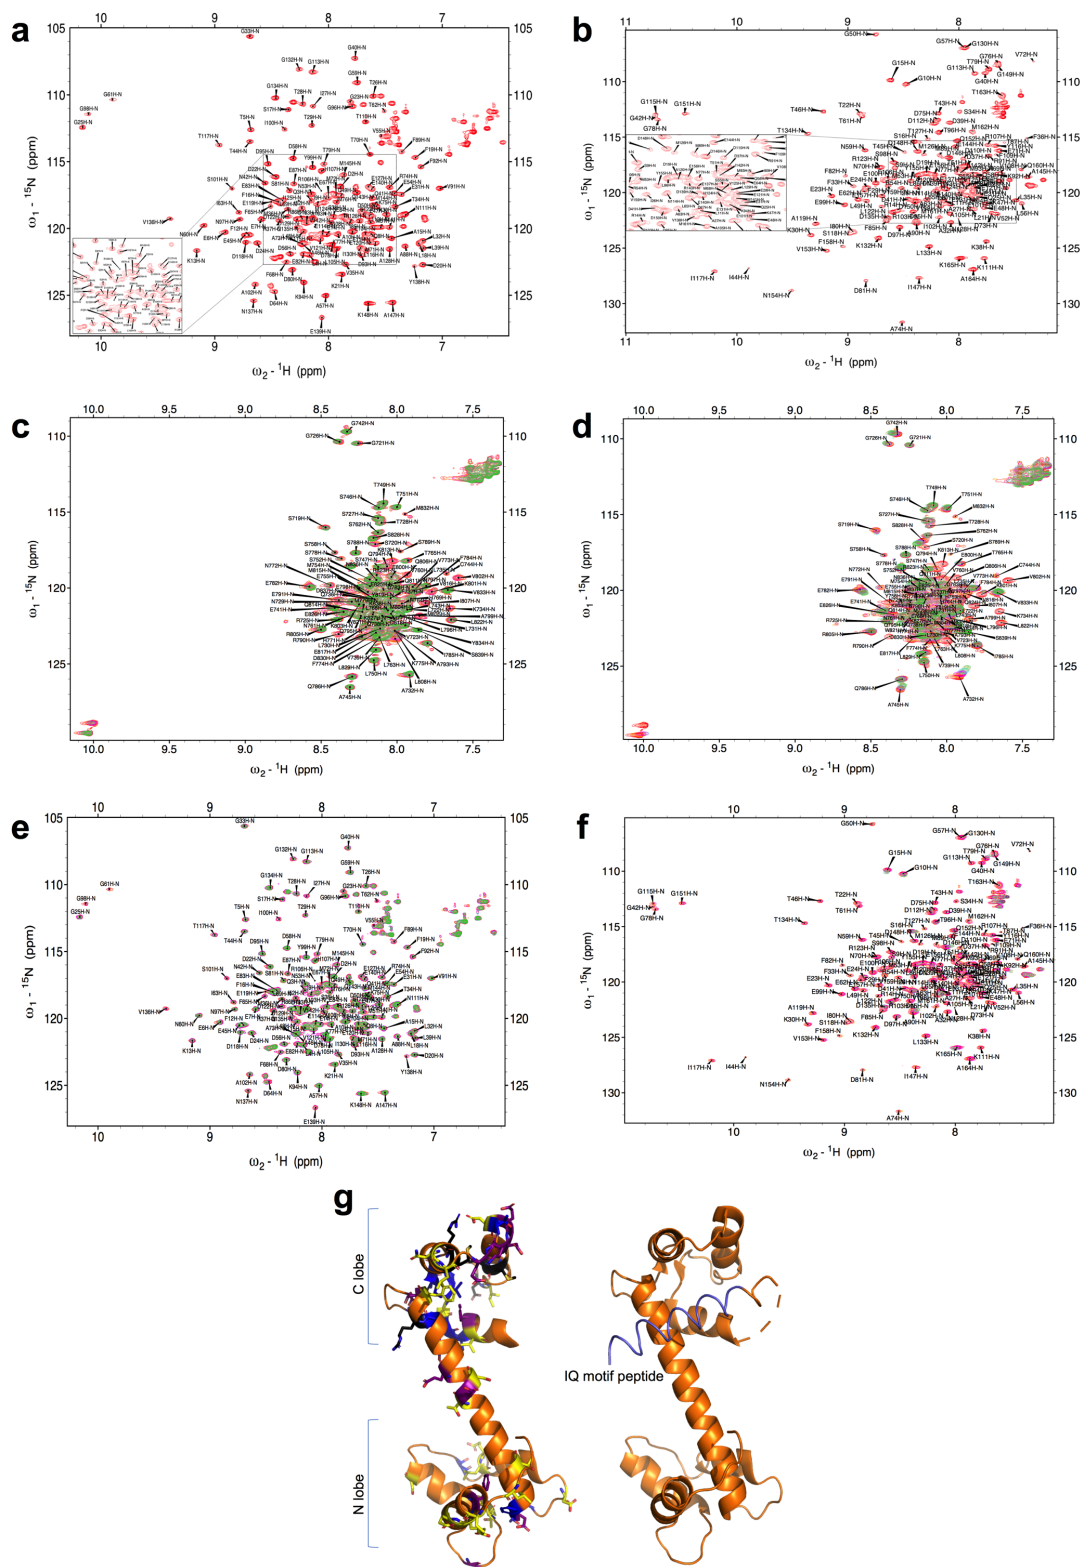

**Supplementary Figure 11. NMR analysis of CaM–PYK2 KFL interactions.** [ $^1\text{H}$ ,  $^{15}\text{N}$ ] HSQC spectra for the NMR backbone assignment of (a) apo-CaM and (b)  $\text{Ca}^{2+}$ /CaM (c) [ $^1\text{H}$ ,  $^{15}\text{N}$ ] HSQC overlay for PYK2 KFL<sub>728-839</sub> in the absence (red) and presence of 0.5 (orange), 1 (magenta), 2 (blue), 4 (beige), and 8 (green) times molar excess of CaM in buffer containing 1 mM EGTA. (d) As (c) but in the presence of 5 mM  $\text{Ca}^{2+}$ . (e) [ $^1\text{H}$ ,  $^{15}\text{N}$ ] HSQC overlay for apo-CaM in the absence (red) and presence of 0.5 (orange), 1 (magenta), 2 (blue), 4 (beige), and 8 (green) times molar excess of PYK2 KFL<sub>728-839</sub> in buffer containing 1

mM EGTA. **(f)** As **(e)**, but in the presence of 5 mM  $\text{Ca}^{2+}$ . **(g)** *Left:* The CSP data for  $^{13}\text{C}, ^{15}\text{N}$  apo-CaM obtained during the titration with PYK2 KFL<sub>728-839</sub> was mapped on the 3D structure of apo-CaM (PDB ID: 4e53). Residues that showed major shifts are coloured purple, minor shifts coloured yellow and residues for which resonances disappeared are coloured blue. Unassigned and prolines coloured black. *Right:* The 3D structure of the neuromodulin IQ peptide (blue) bound to apo-CaM (gold; PDB ID: 4e53) is shown for comparison.

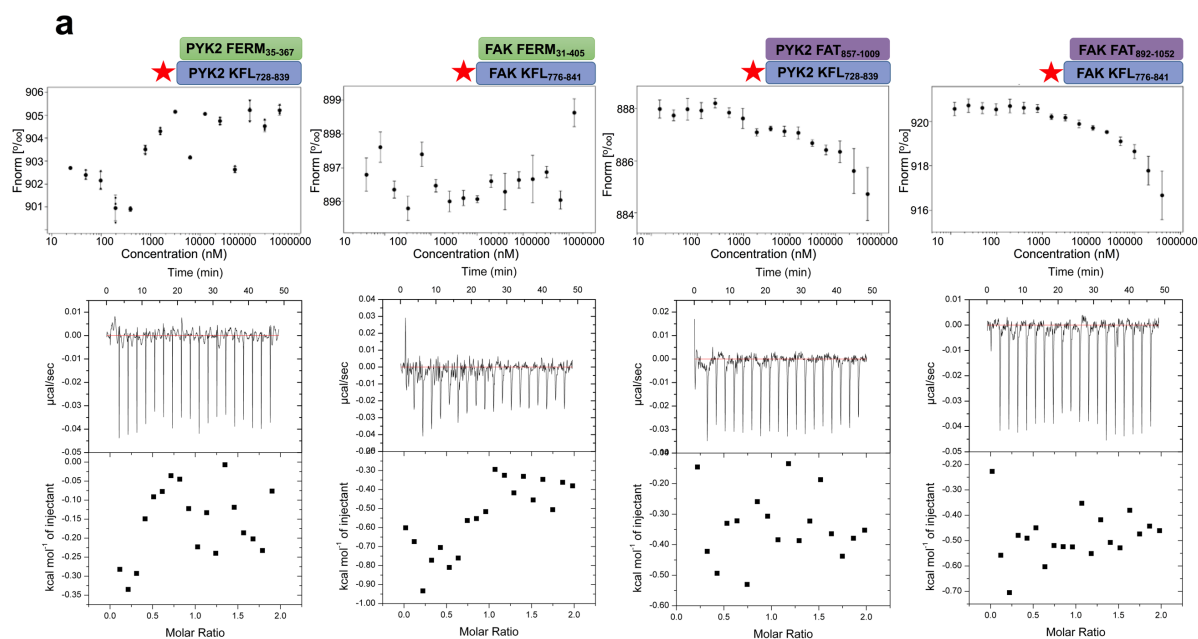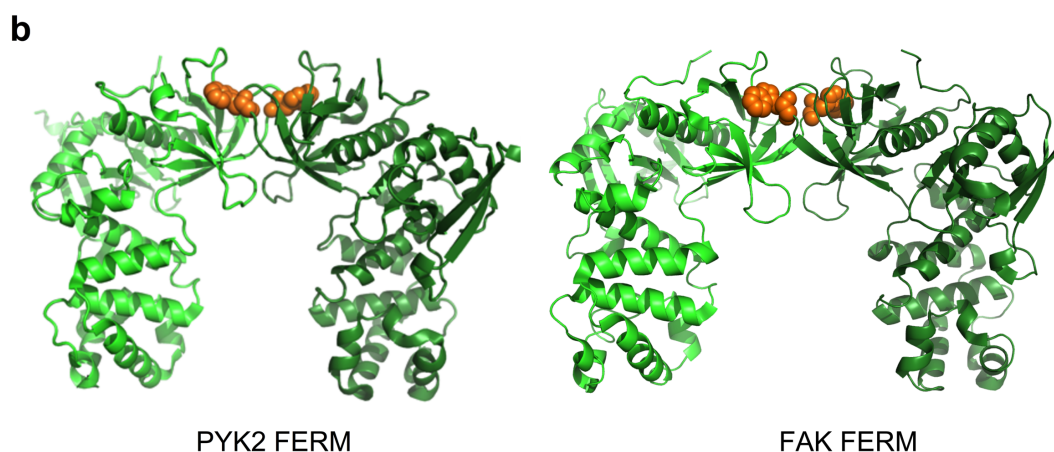

**Supplementary Figure 12. Probing intramolecular interactions. (a)** MST (*top*) and ITC (*bottom*) analyses to probe binding between the KFL of PYK2 or FAK and their other protein domains. The red star indicates the fluorescently labelled protein. **(b)** The 3D crystal structures of the FERM domain of PYK2 (PDB 4eku) and FAK (PDB 4yn0) contain the same dimers in the crystal lattice (monomers are shown in light and dark green). W266, which is critical for dimerization in FAK FERM, and the corresponding PYK2 W273 are shown as orange sphere models. Binding experiments are represented as (mean  $\pm$  SD, n=3).

## Supplementary Tables

**Supplementary Table 1. CD analysis.** *Top:* Secondary structure content predicted by sequence analysis PSIPRED<sup>4</sup>, and derived from CDdata using the CAPITO web-server ([capito.uni-jena.de](http://capito.uni-jena.de);<sup>10</sup>) with JASCO ASCII output. *Bottom:* Helical content analysis for PYK2 KFL<sub>728-839</sub>, CaM and PYK2 KFL<sub>728-839</sub> : CaM complex showing no gain in PYK2 KFL<sub>728-839</sub> helicity upon CaM interaction

| Construct                                            | Predicted helical content | Helical content CD spectra |                 |              |
|------------------------------------------------------|---------------------------|----------------------------|-----------------|--------------|
|                                                      |                           | $\alpha$ -helix            | $\beta$ -sheets | Random coils |
| PYK2 KFL <sub>728-839</sub> – Ca <sup>2+</sup>       | 41%                       | 36%                        | 2%              | 62%          |
| PYK2 KFL <sub>728-839</sub> – EGTA                   | 41%                       | 36%                        | 1%              | 63%          |
| CaM - Ca <sup>2+</sup>                               | -                         | 65%                        | 2%              | 33%          |
| CaM - EGTA                                           | -                         | 61%                        | 3%              | 36%          |
| PYK2 KFL <sub>728-839</sub> : CaM - Ca <sup>2+</sup> | -                         | 46%                        | 3%              | 51%          |
| PYK2 KFL <sub>728-839</sub> : CaM - EGTA             | -                         | 49%                        | 2%              | 49%          |
| FAK KFL <sub>776-841</sub>                           | 35%                       | 27%                        | 2%              | 71%          |

  

| Construct                                            | No. of residues | No. of helical residues |
|------------------------------------------------------|-----------------|-------------------------|
| PYK2 KFL <sub>728-839</sub> – Ca <sup>2+</sup>       | 128             | 46                      |
| CaM - Ca <sup>2+</sup>                               | 164             | 107                     |
| PYK2 KFL <sub>728-839</sub> : CaM - Ca <sup>2+</sup> | 292             | 134                     |
| PYK2 KFL <sub>728-839</sub> – EGTA                   | 128             | 46                      |
| CaM - EGTA                                           | 164             | 100                     |
| PYK2 KFL <sub>728-839</sub> : CaM - EGTA             | 292             | 143                     |

Supplementary Table 2. SAXS analysis

| SAXS protein sample             | <i>Mw</i> calc. (kDa) | Number of amino acids (N) | Globular proteins <sup>11</sup><br>$R_g (\text{Å}) = 6.5 * M^{1/3}$ |                                  | Unfolded proteins <sup>11</sup><br>$R_g (\text{Å}) = 8.05 * M^{0.522}$ |                                  | Chemically denatured <sup>12</sup><br>$R_g = R_0 N^v$ |                                  | Intrinsically disordered <sup>12</sup><br>$R_g = R_0 N^v$ |                                  | <i>R<sub>g</sub></i> (exp) (Å) | <i>D<sub>max</sub></i> | <i>Mw</i> SAXS (kDa) |
|---------------------------------|-----------------------|---------------------------|---------------------------------------------------------------------|----------------------------------|------------------------------------------------------------------------|----------------------------------|-------------------------------------------------------|----------------------------------|-----------------------------------------------------------|----------------------------------|--------------------------------|------------------------|----------------------|
|                                 |                       |                           | <i>R<sub>g</sub></i> (monomer) (Å)                                  | <i>R<sub>g</sub></i> (dimer) (Å) | <i>R<sub>g</sub></i> (monomer) (Å)                                     | <i>R<sub>g</sub></i> (dimer) (Å) | <i>R<sub>g</sub></i> (monomer) (Å)                    | <i>R<sub>g</sub></i> (dimer) (Å) | <i>R<sub>g</sub></i> (monomer) (Å)                        | <i>R<sub>g</sub></i> (dimer) (Å) |                                |                        |                      |
| PYK2 KFL <sub>728-839</sub>     | 15.03                 | 128                       | 15.76                                                               | 19.86                            | 32.25                                                                  | 46.31                            | 35.13                                                 | 53.17                            | 31.97                                                     | 45.91                            | 30.31                          | 110                    | 41.96                |
| MBP–PYK2 KFL <sub>728-839</sub> | 55.88                 | 505                       | 24.84                                                               | 31.30                            | 65.75                                                                  | 94.41                            | 79.82                                                 | 120.82                           | 65.46                                                     | 93.99                            | 44.88                          | 137                    | 110.55               |

M = *Mw* in kDa, N = number of amino acids.

Chemically denatured  $R_0 = 1.93 \pm 0.076$  and  $v = 0.598 \pm 0.028$ .

Intrinsically disordered  $R_0 = 2.54 \pm 0.01$  and  $v = 0.522 \pm 0.01$ .

**Supplementary Table 3. Residues involved in PYK2 KFL<sub>728-839</sub> dimerization**

Residues showing significantly altered backbone amide signals >Interquartile range of CSPs

T728, L735, T749, T751, H769, K775, F784, A799, K803, M804, I807, L808, E817, L822, Q824, Y834, K838

Supplementary Table 4. Summary of residues involved in the CaM-PYK2 KFL association

|                        | +Ca <sup>2+</sup>           |       |                 |       |             |       |               |       |                 |       | +EGTA                       |       |                 |      |             |       |               |      |                 |       |   |
|------------------------|-----------------------------|-------|-----------------|-------|-------------|-------|---------------|-------|-----------------|-------|-----------------------------|-------|-----------------|------|-------------|-------|---------------|------|-----------------|-------|---|
|                        | PYK2 KFL <sub>728-839</sub> |       |                 |       | CaM         |       |               |       |                 |       | PYK2 KFL <sub>728-839</sub> |       |                 |      | CaM         |       |               |      |                 |       |   |
|                        | All (728-839)               | %     | Helix (791-812) | %     | All (1-148) | %     | N-lobe (1-80) | %     | C-lobe (81-148) | %     | All (728-839)               | %     | Helix (791-812) | %    | All (1-148) | %     | N-lobe (1-80) | %    | C-lobe (81-148) | %     |   |
| Total residues         | 112                         | 100   | 22              | 19.6  | 148         | 100   | 80            | 54.1  | 68              | 45.9  | 112                         | 100   | 22              | 19.6 | 148         | 100   | 80            | 54.1 | 68              | 45.9  |   |
| Total Interactions     | 40                          | 35.7  | 9               | 40.9  | 31          | 20.9  | 19            | 23.8  | 12              | 16.1  | 23                          | 20.5  | 8               | 36.4 | 24          | 16.2  | 8             | 10.0 | 16              | 23.5  |   |
| Hydrophobic            | 20                          | 50    | 6               | 66.7  | 17          | 54.9  | 11            | 57.9  | 6               | 50.0  | 14                          | 60.9  | 5               | 62.5 | 9           | 37.5  | 4             | 50   | 5               | 31.2  |   |
| Polar                  | 9                           | 22.5  | 1               | 11.1  | 6           | 19.3  | 4             | 21.1  | 2               | 16.7  | 2                           | 8.70  | 2               | 25   | 5           | 20.8  | 2             | 25   | 3               | 18.8  |   |
| Positively charged     | 5                           | 12.5  | 1               | 11.1  | 2           | 6.5   | 2             | 10.5  | 0               | -     | 7                           | 30.4  | 1               | 12.5 | 1           | 4.2   | 0             | -    | 1               | 6.2   |   |
| Negatively charged     | 6                           | 15    | 1               | 11.1  | 6           | 19.3  | 2             | 10.5  | 4               | 33.3  | 0                           | -     | 0               | -    | 9           | 37.5  | 2             | 25   | 7               | 43.8  |   |
| pI binding             | 5.10                        | -     | 6.05            | -     | 4.14        | -     | 6.19          | -     | 3.50            | -     | 11.17                       | -     | 8.75            | -    | 3.58        | -     | 3.56          | -    | 3.77            | -     |   |
| pI total               | 6.64                        | -     | 5.01            | -     | 4.09        | -     | 4.07          | -     | 4.12            | -     | 6.64                        | -     | 5.02            | -    | 4.09        | -     | 4.02          | -    | 4.12            | -     |   |
| Hydrophobicity binding | -                           | 0.095 | -               | 0.478 | -           | 0.271 | -             | 0.337 | -               | 0.158 | -                           | 0.183 | -               | 3.12 | -           | 0.963 | -             | -    | -               | 1.219 | - |
| Hydrophobicity total   | -                           | 0.900 | -               | 1.372 | -           | 0.654 | -             | 0.551 | -               | 0.772 | -                           | -     | 0.960           | -    | -           | 0.654 | -             | -    | -               | 0.772 | - |

**Supplementary Table 5. Nuclear magnetic resonance experiments for CaM and PYK2 KFL<sub>728-839</sub>**

| Study                                                                 | Transmitter frequency | Experiments                                                                                                                                                                                      | Protein concentration  | Solution conditions                                               |
|-----------------------------------------------------------------------|-----------------------|--------------------------------------------------------------------------------------------------------------------------------------------------------------------------------------------------|------------------------|-------------------------------------------------------------------|
| PYK2 KFL <sub>728-839</sub> assignment                                | 950 MHz               | <sup>1</sup> H- <sup>15</sup> N HSQC, HNC $\alpha$ , HNCO, HNC $\alpha$ C $\beta$ , HN(C $\alpha$ )CO, HN(CO)C $\alpha$ , C $\beta$ C $\alpha$ (CO)NH, and <sup>1</sup> H- <sup>15</sup> N TROSY | 250 $\mu$ M            | 20 mM HEPES pH 6.5, 150 mM NaCl, 1 mM TCEP                        |
| Ca <sup>2+</sup> /CaM assignment                                      | 700 MHz               | <sup>1</sup> H- <sup>15</sup> N HSQC, HNC $\alpha$ , HNCO, HNC $\alpha$ C $\beta$ , HN(C $\alpha$ )CO, HN(CO)C $\alpha$ , and C $\beta$ C $\alpha$ (CO)NH                                        | 1200 $\mu$ M           | 20 mM HEPES pH 6.5, 150 mM NaCl, 1 mM TCEP, 5 mM Ca <sup>2+</sup> |
| Apo-CaM assignment                                                    | 950 MHz               | <sup>1</sup> H- <sup>15</sup> N HSQC, HNC $\alpha$ , HNCO, HNC $\alpha$ C $\beta$ , HN(C $\alpha$ )CO, HN(CO)C $\alpha$ , and C $\beta$ C $\alpha$ (CO)NH                                        | 1200 $\mu$ M           | 20 mM HEPES pH 6.5, 150 mM NaCl, 1 mM TCEP, 1 mM EGTA             |
| Assignment confirmation                                               | 950 MHz               | 3D <sup>1</sup> H- <sup>15</sup> N NOESY                                                                                                                                                         | 250 $\mu$ M            | 20 mM HEPES pH 6.5, 100 mM NaCl, 1 mM TCEP                        |
| Ca <sup>2+</sup> /CaM titrations on PYK2 KFL <sub>728-839</sub>       | 700 MHz               | <sup>1</sup> H- <sup>15</sup> N HSQC                                                                                                                                                             | 150 $\mu$ M            | 20 mM HEPES pH 6.5, 150 mM NaCl, 1 mM TCEP, 5 mM Ca <sup>2+</sup> |
| Apo-CaM titrations on PYK2 KFL <sub>728-839</sub>                     | 700 MHz               | <sup>1</sup> H- <sup>15</sup> N HSQC                                                                                                                                                             | 150 $\mu$ M            | 20 mM HEPES pH 6.5, 150 mM NaCl, 1 mM TCEP, 1 mM EGTA             |
| PYK2 KFL <sub>728-839</sub> titrations on Ca <sup>2+</sup> /CaM       | 700 MHz               | <sup>1</sup> H- <sup>15</sup> N HSQC                                                                                                                                                             | 150 $\mu$ M            | 20 mM HEPES pH 6.5, 150 mM NaCl, 1 mM TCEP, 5 mM Ca <sup>2+</sup> |
| PYK2 KFL <sub>728-839</sub> titrations on apo-CaM                     | 700 MHz               | <sup>1</sup> H- <sup>15</sup> N HSQC                                                                                                                                                             | 150 $\mu$ M            | 20 mM HEPES pH 6.5, 150 mM NaCl, 1 mM TCEP, 1 mM EGTA             |
| PYK2 KFL <sub>728-839</sub> titrations on PYK2 KFL <sub>728-839</sub> | 700 Mhz               | <sup>1</sup> H- <sup>15</sup> N HSQC                                                                                                                                                             | 100 $\mu$ M:10 $\mu$ M | 20 mM HEPES pH 6.5, 150 mM NaCl, 1 mM TCEP                        |
| PYK2 KFL <sub>728-839</sub> measured on 950 Mhz and 700 Mhz           | 950 Mhz and 700 Mhz   | <sup>1</sup> H- <sup>15</sup> N HSQC                                                                                                                                                             | 100 $\mu$ M            | 20 mM HEPES pH 6.5, 150 mM NaCl, 1 mM TCEP                        |

CaM, calmodulin; PYK2, protein tyrosine kinase 2-beta; HSQC, heteronuclear single quantum coherence; NOESY, nuclear Overhauser effect spectroscopy

## SUPPLEMENTARY REFERENCES

1. Kohno T, Matsuda E, Sasaki H, Sasaki T. Protein-tyrosine kinase CAKbeta/PYK2 is activated by binding Ca<sup>2+</sup>/calmodulin to FERM F2 alpha2 helix and thus forming its dimer. *The Biochemical journal* **410**, 513-523 (2008).
2. Xie J, *et al.* Analysis of the calcium-dependent regulation of proline-rich tyrosine kinase 2 by gonadotropin-releasing hormone. *Molecular endocrinology* **22**, 2322-2335 (2008).
3. Rost B. PHD: predicting one-dimensional protein structure by profile-based neural networks. *Methods Enzymol* **266**, 525-539 (1996).
4. McGuffin LJ, Bryson K, Jones DT. The PSIPRED protein structure prediction server. *Bioinformatics* **16**, 404-405 (2000).
5. Cuff JA, Clamp ME, Siddiqui AS, Finlay M, Barton GJ. JPred: a consensus secondary structure prediction server. *Bioinformatics* **14**, 892-893 (1998).
6. Lupas A, Van Dyke M, Stock J. Predicting coiled coils from protein sequences. *Science* **252**, 1162-1164 (1991).
7. Simm D, Hatje K, Kollmar M. Waggawagga: comparative visualization of coiled-coil predictions and detection of stable single alpha-helices (SAH domains). *Bioinformatics* **31**, 767-769 (2015).
8. Mruk K, Farley BM, Ritacco AW, Kobertz WR. Calmodulation meta-analysis: predicting calmodulin binding via canonical motif clustering. *J Gen Physiol* **144**, 105-114 (2014).
9. Shen Y, Bax A. Protein backbone and sidechain torsion angles predicted from NMR chemical shifts using artificial neural networks. *J Biomol NMR* **56**, 227-241 (2013).
10. Wiedemann C, Bellstedt P, Grolach M. CAPITO--a web server-based analysis and plotting tool for circular dichroism data. *Bioinformatics* **29**, 1750-1757 (2013).
11. Bernado P, Blackledge M. A self-consistent description of the conformational behavior of chemically denatured proteins from NMR and small angle scattering. *Biophys J* **97**, 2839-2845 (2009).
12. Bernado P, Svergun DI. Structural analysis of intrinsically disordered proteins by small-angle X-ray scattering. *Mol Biosyst* **8**, 151-167 (2012).
