# Supplementary material for: PYK2 senses calcium through a disordered dimerization and calmodulin-binding element
Source: Springer Nature journal article supplement (doi:10.1038/s42003-022-03760-8), 2022-08-09
Supplement: MOESM3 [file 42003_2022_3760_MOESM3_ESM.pdf]

## Description of Additional Supplementary Files

**File name:** Supplementary Data

**Description:** The source data underlying graphs, plots, and charts in the manuscript.
