# Supplementary material for: PYK2 senses calcium through a disordered dimerization and calmodulin-binding element
Source: Springer Nature journal article supplement (doi:10.1038/s42003-022-03760-8), 2022-08-09
Supplement: MOESM5 [file 42003_2022_3760_MOESM5_ESM.pdf]

## Reporting Summary

Nature Portfolio wishes to improve the reproducibility of the work that we publish. This form provides structure for consistency and transparency in reporting. For further information on Nature Portfolio policies, see our [Editorial Policies](#) and the [Editorial Policy Checklist](#).

### Statistics

For all statistical analyses, confirm that the following items are present in the figure legend, table legend, main text, or Methods section.

n/a Confirmed

- The exact sample size ( $n$ ) for each experimental group/condition, given as a discrete number and unit of measurement
- A statement on whether measurements were taken from distinct samples or whether the same sample was measured repeatedly
- The statistical test(s) used AND whether they are one- or two-sided  
*Only common tests should be described solely by name; describe more complex techniques in the Methods section.*
- A description of all covariates tested
- A description of any assumptions or corrections, such as tests of normality and adjustment for multiple comparisons
- A full description of the statistical parameters including central tendency (e.g. means) or other basic estimates (e.g. regression coefficient) AND variation (e.g. standard deviation) or associated estimates of uncertainty (e.g. confidence intervals)
- For null hypothesis testing, the test statistic (e.g.  $F$ ,  $t$ ,  $r$ ) with confidence intervals, effect sizes, degrees of freedom and  $P$  value noted  
*Give  $P$  values as exact values whenever suitable.*
- For Bayesian analysis, information on the choice of priors and Markov chain Monte Carlo settings
- For hierarchical and complex designs, identification of the appropriate level for tests and full reporting of outcomes
- Estimates of effect sizes (e.g. Cohen's  $d$ , Pearson's  $r$ ), indicating how they were calculated

*Our web collection on [statistics for biologists](#) contains articles on many of the points above.*

### Software and code

Policy information about [availability of computer code](#)

Data collection

Unicorn 7.0  
 Jasco 1.51  
 Astra 7  
 Sednterp 1.09  
 NanoTemper Control 2.0.2.29  
 Microcal iTC200 software  
 TopSpin 3.6  
 Odyssey CLx (LI-COR)  
 PHERAstar FS 5.70  
 SoftMax Pro 7

## Data analysis

Unicorn 7.0  
 Astra 7  
 Sedphat 10.40  
 NT Analysis 1.4.23  
 Origin 7.0  
 CINDY  
 CYANA 3  
 CNS 1.2  
 Image Studio Lite 5.2 (LI-COR)  
 GraphPad Prism 9  
 NMRFAM-SPARKY  
 Microsoft Excel 16.62

For manuscripts utilizing custom algorithms or software that are central to the research but not yet described in published literature, software must be made available to editors and reviewers. We strongly encourage code deposition in a community repository (e.g. GitHub). See the Nature Portfolio [guidelines for submitting code & software](#) for further information.

## Data

Policy information about [availability of data](#)

All manuscripts must include a [data availability statement](#). This statement should provide the following information, where applicable:

- Accession codes, unique identifiers, or web links for publicly available datasets
- A description of any restrictions on data availability
- For clinical datasets or third party data, please ensure that the statement adheres to our [policy](#)

NMR assignments of PYK2 KFL728–839 are deposited in the Biological Magnetic Resonance Data Bank (BMRB accession code: 50961). The source data underlying graphs, plots, and charts in the main manuscript are presented in Supplementary Data.

## Field-specific reporting

Please select the one below that is the best fit for your research. If you are not sure, read the appropriate sections before making your selection.

- Life sciences       Behavioural & social sciences       Ecological, evolutionary & environmental sciences

For a reference copy of the document with all sections, see [nature.com/documents/nr-reporting-summary-flat.pdf](https://nature.com/documents/nr-reporting-summary-flat.pdf)

## Life sciences study design

All studies must disclose on these points even when the disclosure is negative.

|                 |                                                                                                                                                                  |
|-----------------|------------------------------------------------------------------------------------------------------------------------------------------------------------------|
| Sample size     | The sample size (n) of each experiment is provided in the corresponding figure captions in the main manuscript and supplementary information files               |
| Data exclusions | No data were excluded from the analyses                                                                                                                          |
| Replication     | All attempts for replication of data were successful                                                                                                             |
| Randomization   | The work does not involve participant groups. Therefore, randomization was not relevant to this study.                                                           |
| Blinding        | Materials and Methods for the experiments were predetermined. Also, the study does not involve participant groups, hence blinding was not relevant to the study. |

## Reporting for specific materials, systems and methods

We require information from authors about some types of materials, experimental systems and methods used in many studies. Here, indicate whether each material, system or method listed is relevant to your study. If you are not sure if a list item applies to your research, read the appropriate section before selecting a response.

## Materials &amp; experimental systems

|                                     |                                                           |
|-------------------------------------|-----------------------------------------------------------|
| n/a                                 | Involvement in the study                                  |
| <input type="checkbox"/>            | <input checked="" type="checkbox"/> Antibodies            |
| <input type="checkbox"/>            | <input checked="" type="checkbox"/> Eukaryotic cell lines |
| <input checked="" type="checkbox"/> | <input type="checkbox"/> Palaeontology and archaeology    |
| <input checked="" type="checkbox"/> | <input type="checkbox"/> Animals and other organisms      |
| <input checked="" type="checkbox"/> | <input type="checkbox"/> Human research participants      |
| <input checked="" type="checkbox"/> | <input type="checkbox"/> Clinical data                    |
| <input checked="" type="checkbox"/> | <input type="checkbox"/> Dual use research of concern     |

## Methods

|                                     |                                                 |
|-------------------------------------|-------------------------------------------------|
| n/a                                 | Involvement in the study                        |
| <input checked="" type="checkbox"/> | <input type="checkbox"/> ChIP-seq               |
| <input checked="" type="checkbox"/> | <input type="checkbox"/> Flow cytometry         |
| <input checked="" type="checkbox"/> | <input type="checkbox"/> MRI-based neuroimaging |

## Antibodies

Antibodies used

chicken anti-GFP (#A10262, Invitrogen)  
 mouse anti-tubulin (#T9026, Sigma)  
 anti-chicken 800 nm (#926-32218, LI-COR)  
 anti-mouse 680 nm (#926-68072, LI-COR)  
 rabbit anti-Pyk2 (#P3902, Sigma)  
 Rabbit anti-pY402 Pyk2 (#44-618G, Invitrogen)  
 anti-rabbit 800 nm (#926-32213, LI-COR)

Validation

NA

## Eukaryotic cell lines

Policy information about [cell lines](#)

Cell line source(s)

HEK293T cells in GIBCO media

Authentication

NA

Mycoplasma contamination

NA

Commonly misidentified lines  
(See [ICLAC](#) register)

No commonly misidentified cell lines were used.
