# Supplementary material for: PYK2 senses calcium through a disordered dimerization and calmodulin-binding element
Source: Commun Biol. 2022 Aug 9;5:800. doi: 10.1038/s42003-022-03760-8 (PMC9363500; doi:10.1038/s42003-022-03760-8)
Supplement: Supplementary file 4 — Supplementary Data [file 42003_2022_3760_MOESM4_ESM.xlsx]

## Sheet: Fig. 1
Fig. 1c
Ca2++									EGTA
WT (1-1009)	4.205	6.44	6.313	6.785	6.67	6.259	5.294		0.945	3.675	1.857	1.32	1.67	1.112	2.402
ΔFAT (1-840)		2.56	5.808	6.14	4.69					2.71	1.119	1.905	1.71
FERM- Kinase (1-699)		3.88	4.776	3.65	2.34					2.05	1.3	1.255	1.15
ΔFERM (421-1009)	1.455	1.82	2.155	1.87	0.79				0.305	0.64	0.714	0.625	0.55
FERM (1-364)			2.248	2.98	2.825	3.257	1.201				1.146	1.9	1.14	0.467	0.522
KFL (700-841)	2.55	2.17	4.553	3.305	3.05		5.009		0.795	0.57	0.856	1.44	0.94		1.153
KFL (700-793)		0.2	0.985	1.1	0.49					0.11	0.299	0.425	0.21
GFP	0.09	0.03	0.425	0.17	0.07	0.219	0.037		0.075	0.02	0.193	0.175	0.01	0.334	0.164

## Sheet: Fig. 2c
Fig. 2c
Volume (ml)	Analytical Standards	PYK2KFL 728-839–CaM_Ca2++	PYK2KFL 728-839_CaM_EGTA		Volume (ml)	PYK2KFL 728-839_EGTA	PYK2KFL 728-839_Ca++		Volume (ml)	CaM_Ca++	CaM_EGTA
5.00059	1.45847	0.673343	0.042117		5.00058	0.554237	0.554749		5.00059	0.103021	0.207059
5.00129	1.46521	0.673495	0.042064		5.00059	0.554237	0.554718		5.00129	0.103571	0.20669
5.00199	1.4723	0.67369	0.042117		5.00059	0.554138	0.554138		5.00199	0.103746	0.206633
5.0027	1.47936	0.673663	0.042255		5.00059	0.554237	0.554253		5.0027	0.104114	0.206773
5.0034	1.48602	0.673286	0.042972		5.00059	0.554237	0.554077		5.0034	0.10417	0.206436
5.0041	1.49319	0.673465	0.043605		5.00129	0.554718	0.554237		5.0041	0.104065	0.205626
5.0048	1.50067	0.673217	0.043674		5.00199	0.554138	0.553978		5.0048	0.10409	0.205403
5.0055	1.50829	0.67316	0.043781		5.0027	0.554253	0.553757		5.0055	0.104463	0.206075
5.0062	1.51596	0.672828	0.043552		5.0034	0.554077	0.553917		5.0062	0.10465	0.20623
5.0069	1.5232	0.672649	0.043575		5.0041	0.554237	0.554886		5.0069	0.10473	0.206248
5.0076	1.53046	0.672961	0.043605		5.0048	0.553978	0.555038		5.0076	0.105038	0.205788
5.00831	1.53788	0.673145	0.043674		5.0055	0.554138	0.555176		5.00831	0.104471	0.205292
5.00901	1.5452	0.673034	0.044276		5.0062	0.553917	0.55484		5.00901	0.104116	0.204933
5.00971	1.55257	0.673103	0.0442		5.0069	0.554886	0.554794		5.00971	0.104509	0.204637
5.01041	1.55986	0.673366	0.044612		5.0076	0.554237	0.554108		5.01041	0.104585	0.204492
5.01111	1.56721	0.673225	0.044872		5.00831	0.555176	0.554352		5.01111	0.104498	0.204534
5.01181	1.57448	0.67411	0.044849		5.00901	0.55484	0.554527		5.01181	0.104059	0.204792
5.01251	1.5818	0.67419	0.045207		5.00971	0.554794	0.554359		5.01251	0.103765	0.205255
5.01322	1.5892	0.674346	0.045474		5.01041	0.554108	0.554756		5.01322	0.1038	0.205223
5.01392	1.59663	0.674049	0.045757		5.01111	0.554352	0.555016		5.01392	0.103325	0.205017
5.01462	1.60426	0.674167	0.045795		5.01181	0.554527	0.555168		5.01462	0.102836	0.204505
5.01532	1.61151	0.674239	0.046008		5.01251	0.554359	0.555618		5.01532	0.102756	0.203944
5.01602	1.61878	0.674262	0.046336		5.01322	0.554749	0.555519		5.01602	0.102554	0.204288
5.01672	1.62621	0.674636	0.046443		5.01392	0.554718	0.555077		5.01672	0.102373	0.204258
5.01742	1.63341	0.675357	0.046504		5.01462	0.554138	0.555031		5.01742	0.102653	0.203961
5.01813	1.64037	0.675925	0.046886		5.01532	0.554253	0.554909		5.01813	0.10298	0.203709
5.01883	1.6477	0.676078	0.046878		5.01602	0.554077	0.554672		5.01883	0.103056	0.203884
5.01953	1.65546	0.676196	0.046809		5.01672	0.554237	0.554794		5.01953	0.102468	0.204246
5.02023	1.66322	0.676242	0.04742		5.01742	0.553978	0.554573		5.02023	0.101683	0.204214
5.02093	1.67072	0.675861	0.047954		5.01813	0.553757	0.554497		5.02093	0.101557	0.204412
5.02163	1.67786	0.675552	0.04816		5.01883	0.553917	0.55378		5.02163	0.101587	0.204515
5.02233	1.68478	0.675189	0.048419		5.01953	0.554886	0.553497		5.02233	0.101423	0.204579
5.02304	1.6916	0.675227	0.048785		5.02023	0.555038	0.553947		5.02304	0.101272	0.20452
5.02374	1.69804	0.675605	0.049396		5.02093	0.555176	0.554375		5.02374	0.101269	0.204494
5.02444	1.70541	0.67546	0.049747		5.02163	0.55484	0.554207		5.02444	0.100906	0.204202
5.02514	1.71305	0.674792	0.049884		5.02233	0.554794	0.553734		5.02514	0.100471	0.203261
5.02584	1.72097	0.674358	0.049731		5.02304	0.554108	0.554024		5.02584	0.100212	0.203027
5.02654	1.72874	0.674155	0.049915		5.02374	0.554352	0.553596		5.02654	0.100571	0.203115
5.02724	1.73651	0.674247	0.049411		5.02444	0.554527	0.553925		5.02724	0.100685	0.203188
5.02794	1.74427	0.673789	0.049411		5.02514	0.554359	0.553413		5.02794	0.100849	0.203309
5.02865	1.75208	0.67393	0.049075		5.02584	0.554756	0.553299		5.02865	0.101158	0.203651
5.02935	1.75997	0.674281	0.049335		5.02654	0.555016	0.553513		5.02935	0.101093	0.204018
5.03005	1.76754	0.674438	0.049472		5.02724	0.555168	0.55365		5.03005	0.101095	0.203874
5.03075	1.77508	0.674525	0.04938		5.02794	0.555618	0.553757		5.03075	0.101171	0.20377
5.03145	1.78247	0.674533	0.048999		5.02865	0.555519	0.553284		5.03145	0.101028	0.204037
5.03215	1.79001	0.674369	0.049014		5.02935	0.555077	0.553154		5.03215	0.100668	0.203797
5.03285	1.7976	0.674812	0.049319		5.03005	0.555031	0.553589		5.03285	0.100885	0.203969
5.03356	1.80529	0.674583	0.049365		5.03075	0.554909	0.553192		5.03356	0.100946	0.204527
5.03426	1.81294	0.674751	0.049464		5.03145	0.554672	0.552574		5.03426	0.100612	0.204696
5.03496	1.8205	0.675029	0.049716		5.03215	0.554794	0.552292		5.03496	0.100283	0.20447
5.03566	1.82861	0.674808	0.049777		5.03285	0.554573	0.551926		5.03566	0.100225	0.204222
5.03636	1.83662	0.675025	0.050075		5.03356	0.554497	0.551788		5.03636	0.100225	0.204244
5.03706	1.84472	0.6753	0.050899		5.03426	0.55378	0.551994		5.03706	0.100029	0.20433
5.03776	1.85268	0.675166	0.050792		5.03496	0.553497	0.551422		5.03776	0.099415	0.204306
5.03847	1.86076	0.675449	0.050624		5.03566	0.553947	0.551277		5.03847	0.099113	0.20478
5.03917	1.86863	0.675582	0.0507		5.03636	0.554375	0.551155		5.03917	0.099069	0.205172
5.03987	1.87616	0.676151	0.050204		5.03706	0.554207	0.550835		5.03987	0.099188	0.205196
5.04057	1.88391	0.676315	0.050327		5.03776	0.553734	0.550522		5.04057	0.098999	0.205163
5.04127	1.89157	0.676715	0.050937		5.03847	0.554024	0.550629		5.04127	0.098537	0.204959
5.04197	1.89936	0.677421	0.051273		5.03917	0.553596	0.549789		5.04197	0.098194	0.204823
5.04267	1.9069	0.677566	0.05173		5.03987	0.553925	0.549606		5.04267	0.098343	0.205378
5.04338	1.91452	0.677436	0.051677		5.04057	0.553413	0.549126		5.04338	0.098989	0.206038
5.04408	1.92222	0.677478	0.051303		5.04127	0.553299	0.548523		5.04408	0.099403	0.206526
5.04478	1.92976	0.677425	0.051212		5.04197	0.553513	0.547905		5.04478	0.099653	0.206912
5.04548	1.93729	0.677581	0.051204		5.04267	0.55365	0.548218		5.04548	0.099779	0.207049
5.04618	1.9451	0.678226	0.051601		5.04338	0.553757	0.547874		5.04618	0.09931	0.206776
5.04688	1.9534	0.677352	0.052074		5.04408	0.553284	0.547943		5.04688	0.099068	0.2065
5.04758	1.96147	0.677085	0.052394		5.04478	0.553154	0.547623		5.04758	0.09905	0.206352
5.04828	1.96929	0.676963	0.052745		5.04548	0.553589	0.546783		5.04828	0.098858	0.206155
5.04899	1.97717	0.67757	0.052585		5.04618	0.553192	0.54628		5.04899	0.098705	0.205798
5.04969	1.9849	0.677268	0.052463		5.04688	0.552574	0.546242		5.04969	0.098633	0.20572
5.05039	1.99277	0.677947	0.052249		5.04758	0.552292	0.545319		5.05039	0.098951	0.205624
5.05109	2.00069	0.678268	0.052142		5.04828	0.551926	0.54451		5.05109	0.099377	0.205313
5.05179	2.00851	0.678352	0.052333		5.04899	0.551788	0.544388		5.05179	0.09948	0.205203
5.05249	2.01616	0.677932	0.052791		5.04969	0.551994	0.543854		5.05249	0.099331	0.205175
5.05319	2.02386	0.677989	0.053363		5.05039	0.551422	0.544121		5.05319	0.098963	0.205106
5.0539	2.03175	0.677825	0.053851		5.05109	0.551277	0.544235		5.0539	0.098701	0.204812
5.0546	2.03982	0.677608	0.054095		5.05179	0.551155	0.544289		5.0546	0.098612	0.204614
5.0553	2.04788	0.677848	0.054012		5.05249	0.550835	0.544296		5.0553	0.098692	0.204769
5.056	2.05598	0.67839	0.054149		5.05319	0.550522	0.544189		5.056	0.098663	0.204697
5.0567	2.06419	0.678863	0.054324		5.0539	0.550629	0.544815		5.0567	0.098493	0.204602
5.0574	2.07224	0.679446	0.054164		5.0546	0.549789	0.54541		5.0574	0.098545	0.204474
5.0581	2.08026	0.679885	0.054561		5.0553	0.549606	0.54512		5.0581	0.098854	0.204658
5.05881	2.08811	0.680267	0.054515		5.056	0.549126	0.544655		5.05881	0.099212	0.204455
5.05951	2.09605	0.68093	0.054271		5.0567	0.548523	0.544579		5.05951	0.099851	0.204281
5.06021	2.10393	0.681514	0.053951		5.0574	0.547905	0.54493		5.06021	0.100187	0.205058
5.06091	2.11183	0.681571	0.05331		5.0581	0.548218	0.544884		5.06091	0.100059	0.205253
5.06161	2.12026	0.681453	0.053104		5.05881	0.547874	0.544716		5.06161	0.099979	0.205051
5.06231	2.1285	0.681323	0.053432		5.05951	0.547943	0.544373		5.06231	0.100149	0.205066
5.06301	2.13617	0.682018	0.053966		5.06021	0.547623	0.544212		5.06301	0.100401	0.205051
5.06372	2.14366	0.682048	0.054301		5.06091	0.546783	0.54422		5.06372	0.100616	0.204955
5.06442	2.15128	0.681773	0.054012		5.06161	0.54628	0.544319		5.06442	0.101133	0.204562
5.06512	2.15893	0.682403	0.054073		5.06231	0.546242	0.544441		5.06512	0.100942	0.204021
5.06582	2.16699	0.68312	0.054134		5.06301	0.545319	0.544502		5.06582	0.100622	0.204097
5.06652	2.17532	0.683353	0.054591		5.06372	0.54451	0.544556		5.06652	0.100384	0.2038
5.06722	2.18364	0.683177	0.054378		5.06442	0.544388	0.544579		5.06722	0.100294	0.203319
5.06792	2.19162	0.682918	0.05482		5.06512	0.543854	0.544182		5.06792	0.10018	0.203193
5.06862	2.1995	0.68299	0.054446		5.06582	0.544121	0.544113		5.06862	0.10046	0.202966
5.06933	2.20776	0.683269	0.05434		5.06652	0.544235	0.544327		5.06933	0.101139	0.202941
5.07003	2.21558	0.683017	0.054691		5.06722	0.544289	0.543991		5.07003	0.101301	0.203153
5.07073	2.22323	0.683311	0.054355		5.06792	0.544296	0.543678		5.07073	0.101002	0.203279
5.07143	2.23082	0.682437	0.054279		5.06862	0.544189	0.543137		5.07143	0.100767	0.203273
5.07213	2.23809	0.682632	0.054103		5.06933	0.544815	0.543297		5.07213	0.100885	0.203156
5.07283	2.24577	0.683326	0.053897		5.07003	0.54541	0.543625		5.07283	0.101389	0.203049
5.07353	2.25352	0.683723	0.054271		5.07073	0.54512	0.543533		5.07353	0.101885	0.202541
5.07424	2.26152	0.683398	0.054599		5.07143	0.544655	0.543404		5.07424	0.102085	0.202099
5.07494	2.26911	0.683585	0.054889		5.07213	0.544579	0.543869		5.07494	0.101921	0.201972
5.07564	2.27601	0.683692	0.055339		5.07283	0.54493	0.543907		5.07564	0.101608	0.201747
5.07634	2.28274	0.683562	0.055537		5.07353	0.544884	0.543274		5.07634	0.101845	0.201621
5.07704	2.2896	0.683463	0.055125		5.07424	0.544716	0.543152		5.07704	0.102222	0.201545
5.07774	2.29726	0.68317	0.05482		5.07494	0.544373	0.543327		5.07774	0.102087	0.201067
5.07844	2.30518	0.683177	0.054843		5.07564	0.544212	0.543602		5.07844	0.101909	0.200577
5.07914	2.31293	0.683723	0.05479		5.07634	0.54422	0.543671		5.07914	0.101862	0.199971
5.07985	2.32089	0.684398	0.054927		5.07704	0.544319	0.544144		5.07985	0.10177	0.199264
5.08055	2.3287	0.684474	0.055804		5.07774	0.544441	0.543777		5.08055	0.102087	0.198869
5.08125	2.33676	0.684325	0.056499		5.07844	0.544502	0.544174		5.08125	0.102709	0.1985
5.08195	2.34436	0.68481	0.05717		5.07914	0.544556	0.544029		5.08195	0.103269	0.198179
5.08265	2.35187	0.685455	0.056918		5.07985	0.544579	0.543991		5.08265	0.103948	0.197925
5.08335	2.35939	0.685687	0.056865		5.08055	0.544182	0.543793		5.08335	0.104507	0.197813
5.08406	2.36716	0.685748	0.056544		5.08125	0.544113	0.54377		5.08406	0.105047	0.197865
5.08476	2.3751	0.685935	0.056705		5.08195	0.544327	0.543869		5.08476	0.105375	0.197485
5.08546	2.38292	0.686149	0.057437		5.08265	0.543991	0.54467		5.08546	0.105539	0.197087
5.08616	2.39045	0.68629	0.057376		5.08335	0.543678	0.545197		5.08616	0.105364	0.197108
5.08686	2.39834	0.686286	0.057635		5.08406	0.543137	0.545425		5.08686	0.105236	0.197155
5.08756	2.4063	0.68658	0.057742		5.08476	0.543297	0.546036		5.08756	0.105495	0.197108
5.08826	2.41488	0.686385	0.05759		5.08546	0.543625	0.54612		5.08826	0.105493	0.19732
5.08896	2.42283	0.686	0.057079		5.08616	0.543533	0.546112		5.08896	0.105621	0.197528
5.08967	2.43077	0.686622	0.05701		5.08686	0.543404	0.545998		5.08967	0.105745	0.197612
5.09037	2.43845	0.687064	0.056781		5.08756	0.543869	0.545677		5.09037	0.105751	0.197591
5.09107	2.4459	0.686954	0.056857		5.08826	0.543907	0.544968		5.09107	0.105762	0.19757
5.09177	2.45348	0.686977	0.057269		5.08896	0.543274	0.544609		5.09177	0.105976	0.197436
5.09247	2.46133	0.686874	0.057437		5.08967	0.543152	0.544388		5.09247	0.106241	0.197183
5.09317	2.46859	0.686599	0.057849		5.09037	0.543327	0.543983		5.09317	0.10615	0.197065
5.09387	2.47711	0.686553	0.05791		5.09107	0.543602	0.543991		5.09387	0.106054	0.19672
5.09458	2.48515	0.686168	0.057658		5.09177	0.543671	0.54422		5.09458	0.105554	0.196987
5.09528	2.49262	0.686305	0.057559		5.09247	0.544144	0.544327		5.09528	0.104952	0.196983
5.09598	2.50072	0.686153	0.057513		5.09317	0.543777	0.543976		5.09598	0.104954	0.196563
5.09668	2.50902	0.686195	0.057536		5.09387	0.544174	0.544258		5.09668	0.104919	0.196366
5.09738	2.51644	0.686416	0.057735		5.09458	0.544029	0.544403		5.09738	0.104746	0.196052
5.09808	2.52443	0.686462	0.05788		5.09528	0.543991	0.544441		5.09808	0.104622	0.19577
5.09878	2.5327	0.686469	0.057857		5.09598	0.543793	0.544342		5.09878	0.104517	0.195844
5.09948	2.54079	0.686828	0.057857		5.09668	0.54377	0.544418		5.09948	0.104196	0.195927
5.10019	2.5492	0.687133	0.058032		5.09738	0.543869	0.543839		5.10019	0.104252	0.195971
5.10089	2.55751	0.68674	0.058353		5.09808	0.54467	0.543747		5.10089	0.104627	0.195705
5.10159	2.56502	0.686496	0.058467		5.09878	0.545197	0.543732		5.10159	0.104833	0.195438
5.10229	2.5728	0.686752	0.058437		5.09948	0.545425	0.543404		5.10229	0.105039	0.195685
5.10299	2.58058	0.687038	0.058284		5.10019	0.546036	0.543594		5.10299	0.105079	0.195907
5.10369	2.58851	0.686927	0.058887		5.10089	0.54612	0.543571		5.10369	0.105024	0.195657
5.1044	2.59627	0.687003	0.059428		5.10159	0.546112	0.543495		5.1044	0.104944	0.195177
5.1051	2.6042	0.686954	0.059962		5.10229	0.545998	0.543907		5.1051	0.105198	0.194709
5.1058	2.61253	0.687202	0.060207		5.10299	0.545677	0.544006		5.1058	0.105463	0.194253
5.1065	2.62064	0.687141	0.060313		5.10369	0.544968	0.544174		5.1065	0.105692	0.194247
5.1072	2.62899	0.687495	0.061023		5.1044	0.544609	0.54422		5.1072	0.105873	0.194075
5.1079	2.63741	0.687366	0.061382		5.1051	0.544388	0.544205		5.1079	0.106014	0.19355
5.1086	2.64543	0.686893	0.061687		5.1058	0.543983	0.54435		5.1086	0.105947	0.193091
5.1093	2.65356	0.686843	0.061923		5.1065	0.543991	0.543739		5.1093	0.105877	0.192675
5.11001	2.66094	0.687061	0.06245		5.1072	0.54422	0.543694		5.11001	0.105884	0.192423
5.11071	2.66915	0.686629	0.06293		5.1079	0.544327	0.544083		5.11071	0.106163	0.192354
5.11141	2.67786	0.686473	0.063533		5.1086	0.543976	0.544174		5.11141	0.106329	0.19198
5.11211	2.68635	0.686382	0.063716		5.1093	0.544258	0.544357		5.11211	0.106277	0.191493
5.11281	2.69405	0.686038	0.063808		5.11001	0.544403	0.544113		5.11281	0.106331	0.191475
5.11351	2.70194	0.68597	0.064014		5.11071	0.544441	0.544151		5.11351	0.106092	0.191468
5.11421	2.7103	0.685764	0.064456		5.11141	0.544342	0.544075		5.11421	0.105692	0.191682
5.11492	2.71861	0.685428	0.064265		5.11211	0.544418	0.544151		5.11492	0.105289	0.192295
5.11562	2.72717	0.685027	0.064235		5.11281	0.543839	0.544197		5.11562	0.104841	0.192489
5.11632	2.73516	0.684695	0.064197		5.11351	0.543747	0.543938		5.11632	0.104759	0.192897
5.11702	2.74302	0.684291	0.0638		5.11421	0.543732	0.543816		5.11702	0.104935	0.193131
5.11772	2.75117	0.684047	0.063564		5.11492	0.543404	0.544312		5.11772	0.104662	0.193149
5.11842	2.75954	0.683841	0.063892		5.11562	0.543594	0.544907		5.11842	0.104315	0.193215
5.11912	2.76711	0.684165	0.06393		5.11632	0.543571	0.545517		5.11912	0.104151	0.192966
5.11982	2.7758	0.68428	0.063731		5.11702	0.543495	0.545464		5.11982	0.104227	0.193097
5.12053	2.78422	0.684276	0.063411		5.11772	0.543907	0.54512		5.12053	0.104162	0.193351
5.12123	2.7928	0.684097	0.063197		5.11842	0.544006	0.545494		5.12123	0.104523	0.193311
5.12193	2.80128	0.683955	0.063434		5.11912	0.544174	0.545433		5.12193	0.105011	0.193207
5.12263	2.80998	0.683772	0.063678		5.11982	0.54422	0.545547		5.12263	0.10507	0.193438
5.12333	2.81852	0.683887	0.063731		5.12053	0.544205	0.54493		5.12333	0.105352	0.19331
5.12403	2.82683	0.684341	0.063869		5.12123	0.54435	0.544945		5.12403	0.10503	0.193286
5.12474	2.83515	0.684505	0.064044		5.12193	0.543739	0.545372		5.12474	0.104521	0.193318
5.12544	2.84311	0.684848	0.06454		5.12263	0.543694	0.545784		5.12544	0.104639	0.193228
5.12614	2.8517	0.685039	0.064639		5.12333	0.544083	0.54612		5.12614	0.104904	0.193036
5.12684	2.86011	0.685149	0.065166		5.12403	0.544174	0.545532		5.12684	0.104952	0.192514
5.12754	2.86787	0.685256	0.065623		5.12474	0.544357	0.545616		5.12754	0.105038	0.192417
5.12824	2.87588	0.685493	0.065982		5.12544	0.544113	0.546196		5.12824	0.105177	0.192149
5.12894	2.88316	0.685184	0.066058		5.12614	0.544151	0.546104		5.12894	0.105209	0.192246
5.12964	2.89027	0.685355	0.066196		5.12684	0.544075	0.546135		5.12964	0.105461	0.192244
5.13035	2.89777	0.684917	0.066524		5.12754	0.544151	0.546562		5.13035	0.105965	0.19216
5.13105	2.90561	0.68534	0.06692		5.12824	0.544197	0.546745		5.13105	0.105903	0.192411
5.13175	2.91382	0.685451	0.067249		5.12894	0.543938	0.546219		5.13175	0.10589	0.192545
5.13245	2.92179	0.685172	0.067317		5.12964	0.543816	0.546066		5.13245	0.106397	0.192854
5.13315	2.93027	0.685355	0.067592		5.13035	0.544312	0.546356		5.13315	0.10655	0.193186
5.13385	2.93814	0.685271	0.068057		5.13105	0.544907	0.545998		5.13385	0.106113	0.192888
5.13455	2.94627	0.685077	0.068324		5.13175	0.545517	0.545235		5.13455	0.105753	0.192932
5.13526	2.95386	0.684737	0.068538		5.13245	0.545464	0.544945		5.13526	0.105667	0.192974
5.13596	2.96229	0.684978	0.068866		5.13315	0.54512	0.544647		5.13596	0.10552	0.193384
5.13666	2.97117	0.685233	0.069034		5.13385	0.545494	0.544632		5.13666	0.105656	0.193627
5.13736	2.97945	0.685088	0.068835		5.13455	0.545433	0.544731		5.13736	0.105772	0.19365
5.13806	2.98741	0.685233	0.069057		5.13526	0.545547	0.544449		5.13806	0.105942	0.1933
5.13876	2.99601	0.685321	0.069423		5.13596	0.54493	0.543869		5.13876	0.105945	0.192892
5.13946	3.00422	0.685382	0.069873		5.13666	0.544945	0.543625		5.13946	0.106043	0.193101
5.14016	3.01237	0.685382	0.070041		5.13736	0.545372	0.543434		5.14016	0.105936	0.19307
5.14087	3.02034	0.684924	0.07027		5.13806	0.545784	0.543663		5.14087	0.10589	0.193406
5.14157	3.02833	0.685126	0.070255		5.13876	0.54612	0.544151		5.14157	0.10552	0.193189
5.14227	3.03649	0.684795	0.070781		5.13946	0.545532	0.544228		5.14227	0.10511	0.1931
5.14297	3.04464	0.684638	0.071567		5.14016	0.545616	0.543839		5.14297	0.104942	0.193538
5.14367	3.05295	0.684604	0.071925		5.14087	0.546196	0.543709		5.14367	0.104671	0.193946
5.14437	3.06115	0.684322	0.072528		5.14157	0.546104	0.544151		5.14437	0.104585	0.194029
5.14508	3.06981	0.68436	0.073116		5.14227	0.546135	0.543938		5.14508	0.104589	0.194327
5.14578	3.07798	0.684505	0.073009		5.14297	0.546562	0.543381		5.14578	0.104751	0.194528
5.14648	3.08544	0.684608	0.073116		5.14367	0.546745	0.543152		5.14648	0.105066	0.194439
5.14718	3.09354	0.685134	0.073215		5.14437	0.546219	0.543198		5.14718	0.105059	0.194527
5.14788	3.10243	0.685508	0.072932		5.14508	0.546066	0.543114		5.14788	0.104914	0.194715
5.14858	3.11087	0.685931	0.073055		5.14578	0.546356	0.542809		5.14858	0.104997	0.194537
5.14928	3.11911	0.685771	0.073329		5.14648	0.545998	0.542969		5.14928	0.10539	0.194779
5.14998	3.12744	0.686259	0.073734		5.14718	0.545235	0.542633		5.14998	0.105718	0.194345
5.15069	3.13599	0.686511	0.074031		5.14788	0.544945	0.541969		5.15069	0.10585	0.194036
5.15139	3.14414	0.686904	0.074779		5.14858	0.544647	0.541573		5.15139	0.105984	0.193628
5.15209	3.1528	0.68719	0.075473		5.14928	0.544632	0.541382		5.15209	0.105926	0.19328
5.15279	3.16093	0.687286	0.075847		5.14998	0.544731	0.541031		5.15279	0.10598	0.192883
5.15349	3.16942	0.687316	0.076335		5.15069	0.544449	0.54084		5.15349	0.106253	0.192644
5.15419	3.17801	0.686748	0.07664		5.15139	0.543869	0.540619		5.15419	0.106668	0.193022
5.15489	3.18587	0.686446	0.076511		5.15209	0.543625	0.540634		5.15489	0.107052	0.193103
5.1556	3.19391	0.686435	0.076617		5.15279	0.543434	0.540695		5.1556	0.107427	0.193137
5.1563	3.20215	0.686462	0.077251		5.15349	0.543663	0.540443		5.1563	0.107334	0.193192
5.157	3.21002	0.686439	0.077907		5.15419	0.544151	0.540237		5.157	0.106987	0.193526
5.1577	3.21781	0.686778	0.078204		5.15489	0.544228	0.53965		5.1577	0.106939	0.193628
5.1584	3.22568	0.686748	0.07822		5.1556	0.543839	0.539558		5.1584	0.107147	0.193327
5.1591	3.2338	0.686897	0.078349		5.1563	0.543709	0.539658		5.1591	0.10787	0.192779
5.1598	3.24166	0.686496	0.078517		5.157	0.544151	0.539185		5.1598	0.108692	0.192772
5.1605	3.25009	0.685943	0.078357		5.1577	0.543938	0.538841		5.1605	0.108993	0.1928
5.16121	3.25861	0.685279	0.078258		5.1584	0.543381	0.538574		5.16121	0.108702	0.193398
5.16191	3.26694	0.685291	0.078098		5.1591	0.543152	0.538857		5.16191	0.1087	0.194067
5.16261	3.27575	0.685107	0.078029		5.1598	0.543198	0.538696		5.16261	0.108717	0.194337
5.16331	3.28422	0.685031	0.077777		5.1605	0.543114	0.538132		5.16331	0.108517	0.194461
5.16401	3.29245	0.685432	0.077724		5.16121	0.542809	0.537758		5.16401	0.108476	0.194531
5.16471	3.30077	0.685535	0.077319		5.16191	0.542969	0.537422		5.16471	0.108291	0.194763
5.16542	3.30898	0.685409	0.077747		5.16261	0.542633	0.537025		5.16542	0.108246	0.194566
5.16612	3.31711	0.685001	0.077556		5.16331	0.541969	0.536911		5.16612	0.108677	0.194763
5.16682	3.32509	0.685115	0.077716		5.16401	0.541573	0.53714		5.16682	0.109112	0.194595
5.16752	3.33338	0.685352	0.077655		5.16471	0.541382	0.537254		5.16752	0.108723	0.194431
5.16822	3.34168	0.685466	0.078227		5.16542	0.541031	0.537125		5.16822	0.108776	0.194341
5.16892	3.34986	0.685676	0.078738		5.16612	0.54084	0.537292		5.16892	0.109331	0.194348
5.16962	3.35814	0.68605	0.078822		5.16682	0.540619	0.537689		5.16962	0.109869	0.194161
5.17032	3.36667	0.686019	0.078654		5.16752	0.540634	0.538223		5.17032	0.110136	0.193826
5.17103	3.37471	0.685931	0.07851		5.16822	0.540695	0.538048		5.17103	0.110367	0.193435
5.17173	3.38243	0.685615	0.078342		5.16892	0.540443	0.537956		5.17173	0.110113	0.192967
5.17243	3.39056	0.685573	0.078044		5.16962	0.540237	0.538132		5.17243	0.109522	0.193238
5.17313	3.39907	0.685817	0.07851		5.17032	0.53965	0.538513		5.17313	0.108724	0.193234
5.17383	3.40707	0.686355	0.078937		5.17103	0.539558	0.539467		5.17383	0.108232	0.193034
5.17453	3.41516	0.686893	0.079181		5.17173	0.539658	0.539658		5.17453	0.108242	0.192207
5.17523	3.42385	0.687144	0.079013		5.17243	0.539185	0.539635		5.17523	0.108383	0.191982
5.17593	3.43211	0.687263	0.078822		5.17313	0.538841	0.538979		5.17593	0.108505	0.191582
5.17664	3.44015	0.687606	0.078571		5.17383	0.538574	0.538399		5.17664	0.108677	0.191411
5.17734	3.44814	0.68814	0.078342		5.17453	0.538857	0.538162		5.17734	0.10897	0.191098
5.17804	3.45623	0.688491	0.078387		5.17523	0.538696	0.538109		5.17804	0.108373	0.191159
5.17874	3.46464	0.688506	0.077991		5.17593	0.538132	0.5382		5.17874	0.108002	0.191002
5.17944	3.47329	0.688613	0.077411		5.17664	0.537758	0.538254		5.17944	0.107982	0.191187
5.18014	3.482	0.688712	0.076656		5.17734	0.537422	0.538177		5.18014	0.107687	0.191562
5.18084	3.49055	0.688583	0.076282		5.17804	0.537025	0.538582		5.18084	0.107757	0.190947
5.18155	3.49873	0.688899	0.076091		5.17874	0.536911	0.53907		5.18155	0.107405	0.190643
5.18225	3.50684	0.689006	0.07603		5.17944	0.53714	0.539139		5.18225	0.107279	0.19078
5.18295	3.51421	0.688537	0.07545		5.18014	0.537254	0.539169		5.18295	0.107145	0.190638
5.18365	3.52134	0.688411	0.075122		5.18084	0.537125	0.53904		5.18365	0.107151	0.190183
5.18435	3.52871	0.6884	0.074939		5.18155	0.537292	0.538544		5.18435	0.107157	0.189787
5.18505	3.5367	0.688544	0.074985		5.18225	0.537689	0.53849		5.18505	0.107487	0.189659
5.18576	3.54503	0.688354	0.075061		5.18295	0.538223	0.539162		5.18576	0.10758	0.18956
5.18646	3.55384	0.688331	0.075008		5.18365	0.538048	0.53952		5.18646	0.107704	0.189589
5.18716	3.56216	0.688483	0.074855		5.18435	0.537956	0.539665		5.18716	0.108007	0.189434
5.18786	3.5709	0.688289	0.074466		5.18505	0.538132	0.539902		5.18786	0.107868	0.189388
5.18856	3.57893	0.688098	0.074046		5.18576	0.538513	0.540024		5.18856	0.107767	0.189354
5.18926	3.58687	0.688743	0.073848		5.18646	0.539467	0.539742		5.18926	0.107574	0.188627
5.18996	3.59467	0.689113	0.073985		5.18716	0.539658	0.539063		5.18996	0.107246	0.188171
5.19066	3.60265	0.689017	0.074123		5.18786	0.539635	0.538437		5.19066	0.106817	0.187727
5.19137	3.61087	0.688899	0.074596		5.18856	0.538979	0.538139		5.19137	0.106527	0.187015
5.19207	3.61919	0.688892	0.074779		5.18926	0.538399	0.538071		5.19207	0.106567	0.185997
5.19277	3.62734	0.688869	0.074504		5.18996	0.538162	0.538368		5.19277	0.10614	0.185308
5.19347	3.6359	0.688731	0.074954		5.19066	0.538109	0.53894		5.19347	0.10582	0.185488
5.19417	3.6439	0.688911	0.075214		5.19137	0.5382	0.539406		5.19417	0.105305	0.185946
5.19487	3.65224	0.688968	0.07529		5.19207	0.538254	0.539352		5.19487	0.104946	0.185696
5.19557	3.66083	0.688998	0.075648		5.19277	0.538177	0.539215		5.19557	0.104761	0.185316
5.19627	3.66845	0.689124	0.075893		5.19347	0.538582	0.539452		5.19627	0.104769	0.184356
5.19698	3.67631	0.689635	0.076312		5.19417	0.53907	0.539619		5.19698	0.105156	0.183175
5.19768	3.68458	0.689895	0.076778		5.19487	0.539139	0.539986		5.19768	0.104923	0.182309
5.19838	3.69243	0.690059	0.076877		5.19557	0.539169	0.540169		5.19838	0.104814	0.181617
5.19908	3.70077	0.69012	0.076999		5.19627	0.53904	0.540306		5.19908	0.104748	0.181221
5.19978	3.70901	0.689788	0.076991		5.19698	0.538544	0.540779		5.19978	0.104832	0.180792
5.20048	3.71733	0.689582	0.076907		5.19768	0.53849	0.540817		5.20048	0.104839	0.18091
5.20118	3.72551	0.689819	0.07664		5.19838	0.539162	0.54068		5.20118	0.104925	0.180276
5.20189	3.73395	0.690185	0.076465		5.19908	0.53952	0.540627		5.20189	0.104566	0.180049
5.20259	3.7426	0.690612	0.07635		5.19978	0.539665	0.540665		5.20259	0.104471	0.180191
5.20329	3.75065	0.690948	0.076465		5.20048	0.539902	0.540764		5.20329	0.104544	0.180017
5.20399	3.75902	0.690997	0.076839		5.20118	0.540024	0.541		5.20399	0.104317	0.179681
5.20469	3.76753	0.690902	0.0769		5.20189	0.539742	0.540939		5.20469	0.104065	0.179495
5.20539	3.77571	0.691032	0.077083		5.20259	0.539063	0.540726		5.20539	0.104053	0.179497
5.2061	3.78425	0.691386	0.077205		5.20329	0.538437	0.541077		5.2061	0.103947	0.179467
5.2068	3.7925	0.69131	0.077419		5.20399	0.538139	0.541077		5.2068	0.10383	0.179823
5.2075	3.80113	0.691505	0.07793		5.20469	0.538071	0.540459		5.2075	0.104231	0.17944
5.2082	3.80949	0.691356	0.078212		5.20539	0.538368	0.539955		5.2082	0.104725	0.179515
5.2089	3.81775	0.691089	0.078632		5.2061	0.53894	0.539627		5.2089	0.105057	0.18012
5.2096	3.82609	0.690887	0.078265		5.2068	0.539406	0.539543		5.2096	0.104755	0.18085
5.2103	3.83395	0.691001	0.077998		5.2075	0.539352	0.539436		5.2103	0.10441	0.180934
5.211	3.84211	0.691009	0.077739		5.2082	0.539215	0.539589		5.211	0.10438	0.18128
5.21171	3.85012	0.690421	0.077396		5.2089	0.539452	0.539444		5.21171	0.10457	0.181611
5.21241	3.85857	0.689941	0.077327		5.2096	0.539619	0.539055		5.21241	0.104742	0.1815
5.21311	3.86688	0.68999	0.077525		5.2103	0.539986	0.538994		5.21311	0.10544	0.181387
5.21381	3.87522	0.690154	0.077945		5.211	0.540169	0.538559		5.21381	0.105825	0.18155
5.21451	3.8834	0.690704	0.077579		5.21171	0.540306	0.537964		5.21451	0.105841	0.181518
5.21521	3.89085	0.690871	0.077747		5.21241	0.540779	0.537659		5.21521	0.106399	0.180506
5.21591	3.89843	0.691009	0.077937		5.21311	0.540817	0.537186		5.21591	0.106449	0.180358
5.21662	3.90714	0.690768	0.077693		5.21381	0.54068	0.536766		5.21662	0.106209	0.179916
5.21732	3.91482	0.690517	0.077831		5.21451	0.540627	0.536606		5.21732	0.106056	0.179893
5.21802	3.92283	0.690765	0.078105		5.21521	0.540665	0.536514		5.21802	0.106487	0.17971
5.21872	3.93088	0.69118	0.078899		5.21591	0.540764	0.536545		5.21872	0.106605	0.180014
5.21942	3.93918	0.691436	0.078899		5.21662	0.541	0.536713		5.21942	0.106344	0.180069
5.22012	3.94764	0.691085	0.078746		5.21732	0.540939	0.536247		5.22012	0.105362	0.17991
5.22082	3.95494	0.690803	0.078723		5.21802	0.540726	0.536171		5.22082	0.104835	0.180003
5.22152	3.9626	0.691119	0.079059		5.21872	0.541077	0.536179		5.22152	0.104544	0.179736
5.22223	3.97074	0.690982	0.079257		5.21942	0.541077	0.536369		5.22223	0.103739	0.180116
5.22293	3.97868	0.6911	0.079326		5.22012	0.540459	0.536316		5.22293	0.103735	0.180486
5.22363	3.98684	0.691783	0.079684		5.22082	0.539955	0.536209		5.22363	0.103508	0.180673
5.22433	3.99529	0.691173	0.080096		5.22152	0.539627	0.536247		5.22433	0.103258	0.180835
5.22503	4.00367	0.690658	0.08031		5.22223	0.539543	0.536453		5.22503	0.103109	0.18113
5.22573	4.0125	0.690685	0.080295		5.22293	0.539436	0.536758		5.22573	0.103205	0.181397
5.22644	4.02041	0.690673	0.080074		5.22363	0.539589	0.536774		5.22644	0.103359	0.181831
5.22714	4.0286	0.690997	0.08015		5.22433	0.539444	0.536522		5.22714	0.103273	0.181884
5.22784	4.03694	0.691421	0.080058		5.22503	0.539055	0.536354		5.22784	0.103311	0.181531
5.22854	4.04493	0.69157	0.079921		5.22573	0.538994	0.536049		5.22854	0.102808	0.181198
5.22924	4.05335	0.691306	0.079898		5.22644	0.538559	0.535469		5.22924	0.102497	0.181129
5.22994	4.06151	0.691489	0.079768		5.22714	0.537964	0.53508		5.22994	0.102093	0.18093
5.23064	4.0694	0.691833	0.079616		5.22784	0.537659	0.534996		5.23064	0.102047	0.180661
5.23134	4.07804	0.691802	0.07944		5.22854	0.537186	0.534767		5.23134	0.102026	0.180718
5.23205	4.08621	0.691756	0.079372		5.22924	0.536766	0.534805		5.23205	0.101557	0.180975
5.23275	4.09463	0.691188	0.079692		5.22994	0.536606	0.534363		5.23275	0.10128	0.181564
5.23345	4.10327	0.69136	0.079776		5.23064	0.536514	0.533768		5.23345	0.100563	0.181685
5.23415	4.1113	0.691268	0.079509		5.23134	0.536545	0.533623		5.23415	0.09997	0.182194
5.23485	4.11945	0.691295	0.079669		5.23205	0.536713	0.533218		5.23485	0.099855	0.182254
5.23555	4.12703	0.691543	0.079814		5.23275	0.536247	0.532944		5.23555	0.100044	0.181601
5.23625	4.13406	0.691894	0.079814		5.23345	0.536171	0.532898		5.23625	0.099663	0.181696
5.23696	4.1414	0.691337	0.079868		5.23415	0.536179	0.532906		5.23696	0.099798	0.181851
5.23766	4.14881	0.69144	0.079913		5.23485	0.536369	0.53286		5.23766	0.100187	0.182094
5.23836	4.15663	0.691074	0.080051		5.23555	0.536316	0.532799		5.23836	0.099846	0.182301
5.23906	4.16479	0.690719	0.080318		5.23625	0.536209	0.532745		5.23906	0.099857	0.18275
5.23976	4.17316	0.690902	0.080608		5.23696	0.536247	0.532425		5.23976	0.099687	0.183143
5.24046	4.1817	0.690211	0.080432		5.23766	0.536453	0.532074		5.24046	0.099676	0.183462
5.24116	4.18968	0.689552	0.080455		5.23836	0.536758	0.531677		5.24116	0.099851	0.183325
5.24186	4.19803	0.689571	0.080539		5.23906	0.536774	0.53167		5.24186	0.0998	0.182673
5.24257	4.20572	0.689887	0.080524		5.23976	0.536522	0.531853		5.24257	0.099295	0.182743
5.24327	4.2139	0.690154	0.080707		5.24046	0.536354	0.532066		5.24327	0.099108	0.183007
5.24397	4.22222	0.690322	0.080211		5.24116	0.536049	0.531967		5.24397	0.098963	0.182631
5.24467	4.23077	0.690791	0.080035		5.24186	0.535469	0.531952		5.24467	0.098873	0.182968
5.24537	4.23885	0.690627	0.079906		5.24257	0.53508	0.532318		5.24537	0.098549	0.183097
5.24607	4.24708	0.690295	0.08028		5.24327	0.534996	0.532349		5.24607	0.097984	0.183573
5.24678	4.25534	0.691211	0.080341		5.24397	0.534767	0.532417		5.24678	0.097965	0.18367
5.24748	4.26345	0.691486	0.08028		5.24467	0.534805	0.53289		5.24748	0.097893	0.183929
5.24818	4.27181	0.691337	0.081577		5.24537	0.534363	0.533188		5.24818	0.097593	0.184289
5.24888	4.27994	0.691478	0.081516		5.24607	0.533768	0.533485		5.24888	0.097517	0.184335
5.24958	4.2878	0.690692	0.081645		5.24678	0.533623	0.533928		5.24958	0.097378	0.184429
5.25028	4.29629	0.690536	0.081088		5.24748	0.533218	0.534157		5.25028	0.097076	0.184848
5.25098	4.3043	0.690433	0.081332		5.24818	0.532944	0.534264		5.25098	0.09666	0.18519
5.25168	4.31228	0.690658	0.081149		5.24888	0.532898	0.534561		5.25168	0.096639	0.186138
5.25239	4.32059	0.690391	0.081828		5.24958	0.532906	0.534767		5.25239	0.096218	0.186213
5.25309	4.32884	0.690372	0.082492		5.25028	0.53286	0.534775		5.25309	0.095819	0.186264
5.25379	4.33705	0.690021	0.083095		5.25098	0.532799	0.534821		5.25379	0.095716	0.186006
5.25449	4.34491	0.689605	0.083362		5.25168	0.532745	0.534927		5.25449	0.095629	0.186352
5.25519	4.35276	0.689567	0.083263		5.25239	0.532425	0.535248		5.25519	0.096241	0.186602
5.25589	4.36101	0.690273	0.08385		5.25309	0.532074	0.53524		5.25589	0.096346	0.186654
5.25659	4.36954	0.690021	0.084125		5.25379	0.531677	0.535095		5.25659	0.0963	0.187163
5.2573	4.37775	0.69033	0.084178		5.25449	0.53167	0.5345		5.2573	0.096351	0.187321
5.258	4.3858	0.690429	0.08414		5.25519	0.531853	0.534035		5.258	0.09638	0.187444
5.2587	4.39347	0.690295	0.084041		5.25589	0.532066	0.533958		5.2587	0.09662	0.18666
5.2594	4.4012	0.690826	0.084109		5.25659	0.531967	0.534004		5.2594	0.096279	0.186865
5.2601	4.40926	0.691295	0.084171		5.2573	0.531952	0.534126		5.2601	0.096245	0.18769
5.2608	4.41722	0.691749	0.084224		5.258	0.532318	0.534126		5.2608	0.096498	0.188241
5.2615	4.42568	0.69194	0.084338		5.2587	0.532349	0.534416		5.2615	0.096271	0.188538
5.2622	4.43396	0.691337	0.084811		5.2594	0.532417	0.534622		5.2622	0.096201	0.189349
5.26291	4.44202	0.691367	0.085193		5.2601	0.53289	0.534531		5.26291	0.09614	0.190109
5.26361	4.45019	0.691558	0.085307		5.2608	0.533188	0.534409		5.26361	0.096594	0.190277
5.26431	4.45809	0.692054	0.085544		5.2615	0.533485	0.534546		5.26431	0.096947	0.189558
5.26501	4.46604	0.69184	0.086017		5.2622	0.533928	0.534637		5.26501	0.097092	0.189036
5.26571	4.47415	0.691425	0.086604		5.26291	0.534157	0.535034		5.26571	0.096397	0.189068
5.26641	4.48203	0.69165	0.08665		5.26361	0.534264	0.535378		5.26641	0.096687	0.189001
5.26712	4.49058	0.691844	0.086757		5.26431	0.534561	0.535057		5.26712	0.096531	0.189187
5.26782	4.49839	0.692168	0.086719		5.26501	0.534767	0.534904		5.26782	0.096395	0.189345
5.26852	4.5061	0.691997	0.08623		5.26571	0.534775	0.535027		5.26852	0.096987	0.189528
5.26922	4.51461	0.692161	0.085719		5.26641	0.534821	0.535034		5.26922	0.097307	0.189323
5.26992	4.52251	0.69202	0.08562		5.26712	0.534927	0.534698		5.26992	0.097166	0.189745
5.27062	4.53089	0.691611	0.085155		5.26782	0.535248	0.534248		5.27062	0.096893	0.190053
5.27132	4.53975	0.691879	0.085239		5.26852	0.53524	0.534531		5.27132	0.096844	0.189768
5.27202	4.54793	0.692481	0.085483		5.26922	0.535095	0.534546		5.27202	0.096647	0.189183
5.27273	4.55637	0.692435	0.085872		5.26992	0.5345	0.534401		5.27273	0.096073	0.188823
5.27343	4.56488	0.692142	0.086414		5.27062	0.534035	0.534531		5.27343	0.096332	0.188171
5.27413	4.57275	0.69218	0.086551		5.27132	0.533958	0.534401		5.27413	0.096258	0.188052
5.27483	4.58062	0.692409	0.087054		5.27202	0.534004	0.534859		5.27483	0.096428	0.187325
5.27553	4.58822	0.692523	0.086703		5.27273	0.534126	0.535164		5.27553	0.096165	0.187593
5.27623	4.59628	0.692699	0.086597		5.27343	0.534126	0.535316		5.27623	0.09572	0.187903
5.27693	4.60391	0.693023	0.086292		5.27413	0.534416	0.535034		5.27693	0.095642	0.188146
5.27764	4.61188	0.692706	0.086116		5.27483	0.534622	0.534889		5.27764	0.09622	0.18818
5.27834	4.61929	0.692104	0.086429		5.27553	0.534531	0.535286		5.27834	0.096092	0.187537
5.27904	4.62718	0.691711	0.086635		5.27623	0.534409	0.5355		5.27904	0.095814	0.186975
5.27974	4.63485	0.691337	0.086993		5.27693	0.534546	0.535538		5.27974	0.09547	0.186405
5.28044	4.64294	0.690986	0.087413		5.27764	0.534637	0.535225		5.28044	0.09563	0.186178
5.28114	4.65096	0.690971	0.087207		5.27834	0.535034	0.534973		5.28114	0.09589	0.185394
5.28184	4.65878	0.690891	0.086833		5.27904	0.535378	0.535034		5.28184	0.095577	0.184958
5.28254	4.66678	0.690257	0.086887		5.27974	0.535057	0.53466		5.28254	0.095442	0.184648
5.28325	4.67475	0.689918	0.087207		5.28044	0.534904	0.53418		5.28325	0.095095	0.184222
5.28395	4.68219	0.689689	0.087108		5.28114	0.535027	0.533936		5.28395	0.094927	0.183546
5.28465	4.68981	0.689502	0.086749		5.28184	0.535034	0.533897		5.28465	0.094892	0.183983
5.28535	4.69731	0.689487	0.086749		5.28254	0.534698	0.533867		5.28535	0.094438	0.184363
5.28605	4.70579	0.689716	0.086642		5.28325	0.534248	0.533752		5.28605	0.094438	0.184115
5.28675	4.71352	0.689975	0.086719		5.28395	0.534531	0.533142		5.28675	0.094181	0.184061
5.28745	4.72138	0.689979	0.087199		5.28465	0.534546	0.533112		5.28745	0.094108	0.184304
5.28816	4.72903	0.690292	0.087276		5.28535	0.534401	0.533112		5.28816	0.09396	0.183981
5.28886	4.7364	0.690471	0.087047		5.28605	0.534531	0.533173		5.28886	0.093773	0.183963
5.28956	4.74329	0.690459	0.086345		5.28675	0.534401	0.533669		5.28956	0.093902	0.183249
5.29026	4.75051	0.69041	0.085857		5.28745	0.534859	0.533379		5.29026	0.093517	0.183044
5.29096	4.75815	0.6902	0.086108		5.28816	0.535164	0.533188		5.29096	0.093386	0.183277
5.29166	4.76585	0.689902	0.085979		5.28886	0.535316	0.533203		5.29166	0.09309	0.182962
5.29236	4.77343	0.689948	0.085727		5.28956	0.535034	0.533134		5.29236	0.092707	0.182773
5.29307	4.78119	0.6897	0.086345		5.29026	0.534889	0.533386		5.29307	0.091842	0.182521
5.29377	4.78928	0.689517	0.086475		5.29096	0.535286	0.533272		5.29377	0.091297	0.182746
5.29447	4.7974	0.689449	0.086208		5.29166	0.5355	0.533195		5.29447	0.091652	0.182755
5.29517	4.805	0.689075	0.086047		5.29236	0.535538	0.533211		5.29517	0.09161	0.181854
5.29587	4.81224	0.688628	0.086101		5.29307	0.535225	0.533279		5.29587	0.09095	0.181127
5.29657	4.81991	0.688297	0.085925		5.29377	0.534973	0.532936		5.29657	0.090303	0.180139
5.29727	4.82776	0.687949	0.085834		5.29447	0.535034	0.532768		5.29727	0.090158	0.179001
5.29798	4.83553	0.687598	0.085956		5.29517	0.53466	0.532791		5.29798	0.090193	0.178681
5.29868	4.84314	0.687274	0.085933		5.29587	0.53418	0.532539		5.29868	0.0898	0.178398
5.29938	4.85075	0.686683	0.086063		5.29657	0.533936	0.532433		5.29938	0.089704	0.178692
5.30008	4.85849	0.686549	0.085666		5.29727	0.533897	0.532196		5.30008	0.089691	0.179231
5.30078	4.86622	0.686732	0.085483		5.29798	0.533867	0.531662		5.30078	0.090189	0.179376
5.30148	4.87377	0.687091	0.085223		5.29868	0.533752	0.531174		5.30148	0.089676	0.17947
5.30218	4.88112	0.687144	0.084903		5.29938	0.533142	0.530975		5.30218	0.089601	0.179688
5.30288	4.88877	0.687183	0.084567		5.30008	0.533112	0.531151		5.30288	0.089578	0.179575
5.30359	4.89647	0.687656	0.084628		5.30078	0.533112	0.531181		5.30359	0.08976	0.179247
5.30429	4.90387	0.687862	0.08504		5.30148	0.533173	0.530838		5.30429	0.089714	0.178941
5.30499	4.91086	0.687934	0.085368		5.30218	0.533669	0.531044		5.30499	0.089935	0.178411
5.30569	4.91824	0.688117	0.085635		5.30288	0.533379	0.531494		5.30569	0.089958	0.177987
5.30639	4.92603	0.688464	0.086047		5.30359	0.533188	0.531288		5.30639	0.089651	0.178411
5.30709	4.93352	0.68814	0.086063		5.30429	0.533203	0.531319		5.30709	0.089802	0.178898
5.30779	4.94141	0.687984	0.086078		5.30499	0.533134	0.531319		5.30779	0.090635	0.179168
5.3085	4.94907	0.687747	0.08591		5.30569	0.533386	0.530998		5.3085	0.090374	0.178926
5.3092	4.95635	0.687663	0.08559		5.30639	0.533272	0.530495		5.3092	0.090244	0.207059
5.3099	4.96398	0.687312	0.085368		5.30709	0.533195	0.530434		5.3099	0.090395	0.20669
5.3106	4.97165	0.68724	0.085132		5.30779	0.533211	0.530548		5.3106	0.090486	0.206633
5.3113	4.97911	0.687682	0.084956		5.3085	0.533279	0.53083		5.3113	0.0902	0.206773
5.312	4.98675	0.687728	0.084972		5.3092	0.532936	0.531044		5.312	0.090498	0.206436
5.3127	4.99496	0.687988	0.084949		5.3099	0.532768	0.531052		5.3127	0.090088	0.205626
5.31341	5.00324	0.688506	0.084811		5.3106	0.532791	0.530739		5.31341	0.089729	0.205403
5.31411	5.01126	0.688926	0.084651		5.3113	0.532539	0.530769		5.31411	0.089378	0.206075
5.31481	5.01862	0.689048	0.084171		5.312	0.532433	0.530708		5.31481	0.089435	0.20623
5.31551	5.02598	0.688796	0.084171		5.3127	0.532196	0.530296		5.31551	0.089275	0.206248
5.31621	5.03359	0.688956	0.083652		5.31341	0.531662	0.530823		5.31621	0.089624	0.205788
5.31691	5.04133	0.689281	0.083286		5.31411	0.531174	0.530685		5.31691	0.089352	0.205292
5.31761	5.04944	0.690067	0.083537		5.31481	0.530975	0.531113		5.31761	0.088438	0.204933
5.31832	5.05679	0.690898	0.083896		5.31551	0.531151	0.531616		5.31832	0.088198	0.204637
5.31902	5.06442	0.691261	0.083736		5.31621	0.531181	0.531914		5.31902	0.087995	0.204492
5.31972	5.0724	0.691505	0.083331		5.31691	0.530838	0.531715		5.31972	0.08749	0.204534
5.32042	5.08032	0.691699	0.083469		5.31761	0.531044	0.531738		5.32042	0.087971	0.204792
5.32112	5.0878	0.691745	0.084254		5.31832	0.531494	0.531464		5.32112	0.08785	0.205255
5.32182	5.09515	0.691142	0.084239		5.31902	0.531288	0.531746		5.32182	0.087959	0.205223
5.32252	5.10254	0.691337	0.084689		5.31972	0.531319	0.531509		5.32252	0.08811	0.205017
5.32322	5.11001	0.69131	0.084644		5.32042	0.531319	0.53096		5.32322	0.088375	0.204505
5.32393	5.11754	0.691444	0.085155		5.32112	0.530998	0.531555		5.32393	0.088367	0.203944
5.32463	5.12516	0.691055	0.085208		5.32182	0.530495	0.530991		5.32463	0.08851	0.204288
5.32533	5.1329	0.691039	0.085475		5.32252	0.530434	0.530838		5.32533	0.088777	0.204258
5.32603	5.14046	0.69136	0.085796		5.32322	0.530548	0.53064		5.32603	0.088814	0.203961
5.32673	5.14769	0.692382	0.085849		5.32393	0.53083	0.530762		5.32673	0.088844	0.203709
5.32743	5.15495	0.692439	0.085719		5.32463	0.531044	0.531166		5.32743	0.088798	0.203884
5.32813	5.16238	0.692954	0.085757		5.32533	0.531052	0.5317		5.32813	0.089283	0.204246
5.32884	5.16995	0.693187	0.085712		5.32603	0.530739	0.531807		5.32884	0.089123	0.204214
5.32954	5.17772	0.693122	0.085437		5.32673	0.530769	0.53212		5.32954	0.089033	0.204412
5.33024	5.18563	0.692916	0.085468		5.32743	0.530708	0.53199		5.33024	0.089081	0.204515
5.33094	5.1936	0.693221	0.085597		5.32813	0.530296	0.531906		5.33094	0.088514	0.204579
5.33164	5.20128	0.692973	0.085277		5.32884	0.530823	0.531693		5.33164	0.089409	0.20452
5.33234	5.20873	0.693145	0.084895		5.32954	0.530685	0.531425		5.33234	0.089084	0.204494
5.33304	5.21639	0.693931	0.084743		5.33024	0.531113	0.531357		5.33304	0.089331	0.204202
5.33375	5.2239	0.694152	0.085033		5.33094	0.531616	0.531364		5.33375	0.089975	0.203261
5.33445	5.23151	0.694801	0.085017		5.33164	0.531914	0.531494		5.33445	0.089723	0.203027
5.33515	5.23886	0.694701	0.084567		5.33234	0.531715	0.5317		5.33515	0.089666	0.203115
5.33585	5.24638	0.694732	0.084781		5.33304	0.531738	0.53244		5.33585	0.0895	0.203188
5.33655	5.25422	0.694205	0.085262		5.33375	0.531464	0.532631		5.33655	0.089992	0.203309
5.33725	5.26172	0.69453	0.085475		5.33445	0.531746	0.532715		5.33725	0.089647	0.203651
5.33795	5.26883	0.694793	0.085658		5.33515	0.531509	0.532722		5.33795	0.089502	0.204018
5.33866	5.27643	0.693973	0.085849		5.33585	0.53096	0.532433		5.33866	0.08943	0.203874
5.33936	5.28463	0.693832	0.085979		5.33655	0.531555	0.532837		5.33936	0.089319	0.20377
5.34006	5.2929	0.693629	0.086093		5.33725	0.530991	0.533066		5.34006	0.088737	0.204037
5.34076	5.30075	0.693622	0.085811		5.33795	0.530838	0.533142		5.34076	0.088133	0.203797
5.34146	5.30812	0.693244	0.086047		5.33866	0.53064	0.533081		5.34146	0.088602	0.203969
5.34216	5.3151	0.693256	0.086307		5.33936	0.530762	0.533058		5.34216	0.088501	0.204527
5.34286	5.32146	0.692847	0.08662		5.34006	0.531166	0.53257		5.34286	0.087869	0.204696
5.34356	5.32796	0.692954	0.087238		5.34076	0.5317	0.532478		5.34356	0.08733	0.20447
5.34427	5.33541	0.69321	0.087459		5.34146	0.531807	0.532776		5.34427	0.087246	0.204222
5.34497	5.34316	0.693885	0.087703		5.34216	0.53212	0.532372		5.34497	0.087004	0.204244
5.34567	5.35064	0.693259	0.088123		5.34286	0.53199	0.53199		5.34567	0.086731	0.20433
5.34637	5.35886	0.69279	0.088298		5.34356	0.531906	0.531807		5.34637	0.086969	0.204306
5.34707	5.36719	0.692489	0.08842		5.34427	0.531693	0.532196		5.34707	0.086874	0.20478
5.34777	5.37453	0.69202	0.088481		5.34497	0.531425	0.532669		5.34777	0.087284	0.205172
5.34847	5.38217	0.691745	0.08903		5.34567	0.531357	0.532669		5.34847	0.088442	0.205196
5.34917	5.38953	0.691585	0.089526		5.34637	0.531364	0.532082		5.34917	0.08901	0.205163
5.34988	5.39736	0.691249	0.0899		5.34707	0.531494	0.531952		5.34988	0.089184	0.204959
5.35058	5.4052	0.691505	0.090053		5.34777	0.5317	0.532135		5.35058	0.08935	0.204823
5.35128	5.41271	0.691402	0.090175		5.34847	0.53244	0.531914		5.35128	0.088737	0.205378
5.35198	5.42013	0.691482	0.090282		5.34917	0.532631	0.532082		5.35198	0.089029	0.206038
5.35268	5.42748	0.691234	0.090823		5.34988	0.532715	0.531677		5.35268	0.08946	0.206526
5.35338	5.43507	0.69091	0.091388		5.35058	0.532722	0.531403		5.35338	0.090013	0.206912
5.35409	5.44216	0.691123	0.091869		5.35128	0.532433	0.53138		5.35409	0.090553	0.207049
5.35479	5.44936	0.691478	0.091792		5.35198	0.532837	0.531273		5.35479	0.091329	0.206776
5.35549	5.45667	0.69176	0.092136		5.35268	0.533066	0.531235		5.35549	0.09082	0.2065
5.35619	5.46436	0.69152	0.092303		5.35338	0.533142	0.530983		5.35619	0.090988	0.206352
5.35689	5.47175	0.691741	0.092204		5.35409	0.533081	0.531006		5.35689	0.091362	0.206155
5.35759	5.47939	0.691589	0.091846		5.35479	0.533058	0.531052		5.35759	0.09178	0.205798
5.35829	5.48694	0.691753	0.092303		5.35549	0.53257	0.531265		5.35829	0.092079	0.20572
5.359	5.49446	0.691653	0.092181		5.35619	0.532478	0.530769		5.359	0.092642	0.205624
5.3597	5.50181	0.691795	0.091937		5.35689	0.532776	0.530823		5.3597	0.092621	0.205313
5.3604	5.50876	0.691997	0.090976		5.35759	0.532372	0.530899		5.3604	0.092613	0.205203
5.3611	5.51558	0.69173	0.090991		5.35829	0.53199	0.531631		5.3611	0.092937	0.205175
5.3618	5.5232	0.69128	0.091106		5.359	0.531807	0.53093		5.3618	0.092853	0.205106
5.3625	5.53081	0.691249	0.091212		5.3597	0.532196	0.531006		5.3625	0.093563	0.204812
5.3632	5.53833	0.690936	0.091106		5.3604	0.532669	0.530083		5.3632	0.093599	0.204614
5.3639	5.54554	0.690883	0.09064		5.3611	0.532669	0.529953		5.3639	0.094047	0.204769
5.36461	5.55259	0.691062	0.090556		5.3618	0.532082	0.529762		5.36461	0.093941	0.204697
5.36531	5.55981	0.691211	0.090549		5.3625	0.531952	0.529724		5.36531	0.093777	0.204602
5.36601	5.56709	0.691074	0.090404		5.3632	0.532135	0.529411		5.36601	0.094513	0.204474
5.36671	5.5742	0.691478	0.090656		5.3639	0.531914	0.529564		5.36671	0.09444	0.204658
5.36741	5.58201	0.691428	0.090877		5.36461	0.532082	0.529655		5.36741	0.095045	0.204455
5.36811	5.58942	0.691154	0.091228		5.36531	0.531677	0.529747		5.36811	0.094663	0.204281
5.36881	5.59682	0.691138	0.091594		5.36601	0.531403	0.530128		5.36881	0.094395	0.205058
5.36951	5.60379	0.691013	0.091487		5.36671	0.53138	0.530006		5.36951	0.094868	0.205253
5.37022	5.61108	0.690685	0.090976		5.36741	0.531273	0.529297		5.37022	0.094822	0.205051
5.37092	5.61873	0.690246	0.09064		5.36811	0.531235	0.529129		5.37092	0.094745	0.205066
5.37162	5.62623	0.690192	0.090442		5.36881	0.530983	0.528709		5.37162	0.09458	0.205051
5.37232	5.63364	0.690257	0.090251		5.36951	0.531006	0.528496		5.37232	0.094442	0.204955
5.37302	5.64131	0.690005	0.09019		5.37022	0.531052	0.527885		5.37302	0.094448	0.204562
5.37372	5.64891	0.690093	0.090076		5.37092	0.531265	0.528435		5.37372	0.094238	0.204021
5.37442	5.65604	0.69036	0.089999		5.37162	0.530769	0.528435		5.37442	0.094425	0.204097
5.37513	5.6633	0.69041	0.089931		5.37232	0.530823	0.528198		5.37513	0.094982	0.2038
5.37583	5.67068	0.690681	0.090297		5.37302	0.530899	0.52774		5.37583	0.094856	0.203319
5.37653	5.67804	0.691161	0.089809		5.37372	0.531631	0.52742		5.37653	0.095049	0.203193
5.37723	5.68526	0.691653	0.090442		5.37442	0.53093	0.527031		5.37723	0.095234	0.202966
5.37793	5.69254	0.691634	0.090244		5.37513	0.531006	0.52758		5.37793	0.095575	0.202941
5.37863	5.69954	0.691829	0.090236		5.37583	0.530083	0.527405		5.37863	0.096367	0.203153
5.37934	5.70652	0.691859	0.089435		5.37653	0.529953	0.528069		5.37934	0.096336	0.203279
5.38004	5.71396	0.691653	0.089206		5.37723	0.529762	0.528076		5.38004	0.096693	0.203273
5.38074	5.72134	0.691295	0.089336		5.37793	0.529724	0.52813		5.38074	0.096998	0.203156
5.38144	5.728	0.69194	0.088794		5.37863	0.529411	0.528404		5.38144	0.096678	0.203049
5.38214	5.73452	0.692252	0.089404		5.37934	0.529564	0.52774		5.38214	0.096672	0.202541
5.38284	5.74167	0.692329	0.089931		5.38004	0.529655	0.527191		5.38284	0.096636	0.202099
5.38354	5.74887	0.692474	0.090053		5.38074	0.529747	0.527008		5.38354	0.096056	0.201972
5.38424	5.75591	0.692649	0.090396		5.38144	0.530128	0.527016		5.38424	0.096386	0.201747
5.38495	5.76283	0.692836	0.090335		5.38214	0.530006	0.527489		5.38495	0.096578	0.201621
5.38565	5.77005	0.692989	0.090602		5.38284	0.529297	0.527519		5.38565	0.096371	0.201545
5.38635	5.77702	0.693271	0.090594		5.38354	0.529129	0.527817		5.38635	0.096636	0.201067
5.38705	5.78395	0.693145	0.091052		5.38424	0.528709	0.527321		5.38705	0.096376	0.200577
5.38775	5.79086	0.692554	0.091258		5.38495	0.528496	0.527092		5.38775	0.096466	0.199971
5.38845	5.79784	0.692805	0.090862		5.38565	0.527885	0.52713		5.38845	0.096479	0.199264
5.38915	5.80513	0.692836	0.090808		5.38635	0.528435	0.52713		5.38915	0.09659	0.198869
5.38985	5.81213	0.692405	0.090953		5.38705	0.528435	0.527367		5.38985	0.096386	0.1985
5.39056	5.81938	0.691924	0.090869		5.38775	0.528198	0.527069		5.39056	0.096042	0.198179
5.39126	5.8262	0.692096	0.090572		5.38845	0.52774	0.527893		5.39126	0.095854	0.197925
5.39196	5.83324	0.692485	0.090373		5.38915	0.52742	0.528091		5.39196	0.09547	0.197813
5.39266	5.84006	0.692886	0.090373		5.38985	0.527031	0.527954		5.39266	0.095674	0.197865
5.39336	5.84685	0.692989	0.09035		5.39056	0.52758	0.527672		5.39336	0.095192	0.197485
5.39406	5.85374	0.692294	0.090274		5.39126	0.527405	0.527588		5.39406	0.094417	0.197087
5.39476	5.86113	0.692096	0.090068		5.39196	0.528069	0.527626		5.39476	0.094045	0.197108
5.39547	5.86816	0.691718	0.090228		5.39266	0.528076	0.527786		5.39547	0.093586	0.197155
5.39617	5.87466	0.691489	0.090495		5.39336	0.52813	0.527817		5.39617	0.093132	0.197108
5.39687	5.88092	0.691478	0.091006		5.39406	0.528404	0.52832		5.39687	0.093138	0.19732
5.39757	5.88713	0.69123	0.09064		5.39476	0.52774	0.528313		5.39757	0.092871	0.197528
5.39827	5.89354	0.691238	0.090709		5.39547	0.527191	0.528503		5.39827	0.092769	0.197612
5.39897	5.90031	0.691352	0.090388		5.39617	0.527008	0.528221		5.39897	0.092859	0.197591
5.39968	5.90714	0.690761	0.090518		5.39687	0.527016	0.528099		5.39968	0.092752	0.19757
5.40038	5.91346	0.689952	0.091098		5.39757	0.527489	0.527802		5.40038	0.092489	0.197436
5.40108	5.92038	0.690097	0.091251		5.39827	0.527519	0.527504		5.40108	0.092159	0.197183
5.40178	5.92725	0.690559	0.091518		5.39897	0.527817	0.527534		5.40178	0.092174	0.197065
5.40248	5.93358	0.690288	0.091235		5.39968	0.527321	0.527794		5.40248	0.091577	0.19672
5.40318	5.93961	0.689784	0.090572		5.40038	0.527092	0.527367		5.40318	0.091514	0.196987
5.40388	5.9462	0.690177	0.09077		5.40108	0.52713	0.527184		5.40388	0.091278	0.196983
5.40458	5.95295	0.690074	0.090793		5.40178	0.52713	0.527412		5.40458	0.091022	0.196563
5.40529	5.96031	0.689773	0.09093		5.40248	0.527367	0.528275		5.40529	0.090549	0.196366
5.40599	5.96685	0.690192	0.09109		5.40318	0.527069	0.528542		5.40599	0.090717	0.196052
5.40669	5.97335	0.6907	0.09193		5.40388	0.527893	0.529236		5.40669	0.090751	0.19577
5.40739	5.97975	0.690749	0.092426		5.40458	0.528091	0.529579		5.40739	0.091226	0.195844
5.40809	5.98658	0.69065	0.092136		5.40529	0.527954	0.53051		5.40809	0.091337	0.195927
5.40879	5.99345	0.69004	0.091441		5.40599	0.527672	0.530739		5.40879	0.091326	0.195971
5.40949	6.00059	0.689849	0.091243		5.40669	0.527588	0.530617		5.40949	0.091528	0.195705
5.41019	6.00767	0.689677	0.091266		5.40739	0.527626	0.530861		5.41019	0.090864	0.195438
5.4109	6.01438	0.689792	0.091113		5.40809	0.527786	0.53093		5.4109	0.090952	0.195685
5.4116	6.02081	0.689727	0.090984		5.40879	0.527817	0.531174		5.4116	0.091059	0.195907
5.4123	6.02745	0.689372	0.091251		5.40949	0.52832	0.531097		5.4123	0.090559	0.195657
5.413	6.03423	0.689204	0.091289		5.41019	0.528313	0.530952		5.413	0.090175	0.195177
5.4137	6.04144	0.689349	0.090961		5.4109	0.528503	0.531418		5.4137	0.089565	0.194709
5.4144	6.04844	0.689182	0.090694		5.4116	0.528221	0.53096		5.4144	0.089334	0.194253
5.4151	6.05491	0.688995	0.0909		5.4123	0.528099	0.530861		5.4151	0.088981	0.194247
5.41581	6.06126	0.689544	0.090869		5.413	0.527802	0.530998		5.41581	0.088692	0.194075
5.41651	6.06776	0.689716	0.090884		5.4137	0.527504	0.530678		5.41651	0.089317	0.19355
5.41721	6.07432	0.68962	0.091113		5.4144	0.527534	0.530884		5.41721	0.089134	0.193091
5.41791	6.08108	0.690116	0.090823		5.4151	0.527794	0.53109		5.41791	0.088924	0.192675
5.41861	6.08776	0.690101	0.090305		5.41581	0.527367	0.531334		5.41861	0.088426	0.192423
5.41931	6.09439	0.69015	0.090274		5.41651	0.527184	0.531242		5.41931	0.087545	0.192354
5.42002	6.10103	0.689815	0.090106		5.41721	0.527412	0.53083		5.42002	0.087187	0.19198
5.42072	6.1078	0.689849	0.089565		5.41791	0.528275	0.531227		5.42072	0.087442	0.191493
5.42142	6.11439	0.68967	0.089397		5.41861	0.528542	0.530609		5.42142	0.087015	0.191475
5.42212	6.12122	0.689773	0.088924		5.41931	0.529236	0.530792		5.42212	0.087379	0.191468
5.42282	6.12805	0.690295	0.089046		5.42002	0.529579	0.531181		5.42282	0.087385	0.191682
5.42352	6.13524	0.69015	0.088779		5.42072	0.53051	0.530922		5.42352	0.087566	0.192295
5.42422	6.14203	0.689861	0.088573		5.42142	0.530739	0.530685		5.42422	0.087435	0.192489
5.42492	6.14883	0.689899	0.088756		5.42212	0.530617	0.530602		5.42492	0.087164	0.192897
5.42563	6.15548	0.690101	0.088832		5.42282	0.530861	0.530533		5.42563	0.086988	0.193131
5.42633	6.16245	0.689799	0.088664		5.42352	0.53093	0.530121		5.42633	0.087271	0.193149
5.42703	6.16943	0.689841	0.088634		5.42422	0.531174	0.530029		5.42703	0.087128	0.193215
5.42773	6.17637	0.689513	0.089069		5.42492	0.531097	0.529953		5.42773	0.087343	0.192966
5.42843	6.18308	0.689155	0.089061		5.42563	0.530952	0.530327		5.42843	0.087499	0.193097
5.42913	6.18978	0.689777	0.089214		5.42633	0.531418	0.530319		5.42913	0.087663	0.193351
5.42983	6.19582	0.689883	0.089305		5.42703	0.53096	0.529861		5.42983	0.08769	0.193311
5.43053	6.20217	0.690673	0.089275		5.42773	0.530861	0.529823		5.43053	0.088041	0.193207
5.43124	6.20906	0.690795	0.089435		5.42843	0.530998	0.529716		5.43124	0.088165	0.193438
5.43194	6.21581	0.691024	0.089725		5.42913	0.530678	0.529091		5.43194	0.088045	0.19331
5.43264	6.22242	0.691222	0.090083		5.42983	0.530884	0.52887		5.43264	0.087726	0.193286
5.43334	6.22913	0.69099	0.090388		5.43053	0.53109	0.528694		5.43334	0.087873	0.193318
5.43404	6.23575	0.690643	0.090656		5.43124	0.531334	0.529083		5.43404	0.087511	0.193228
5.43474	6.24239	0.691196	0.090396		5.43194	0.531242	0.528992		5.43474	0.087231	0.193036
5.43544	6.24907	0.691787	0.090526		5.43264	0.53083	0.52916		5.43544	0.087374	0.192514
5.43615	6.2554	0.691982	0.090572		5.43334	0.531227	0.529465		5.43615	0.087694	0.192417
5.43685	6.26187	0.691982	0.090167		5.43404	0.530609	0.529716		5.43685	0.087566	0.192149
5.43755	6.26888	0.692622	0.089946		5.43474	0.530792	0.529091		5.43755	0.087438	0.192246
5.43825	6.27602	0.693454	0.089893		5.43544	0.531181	0.529251		5.43825	0.087705	0.192244
5.43895	6.28241	0.69374	0.090686		5.43615	0.530922	0.529579		5.43895	0.088108	0.19216
5.43965	6.28946	0.693881	0.091426		5.43685	0.530685	0.529289		5.43965	0.088098	0.192411
5.44036	6.29591	0.694907	0.091769		5.43755	0.530602	0.5289		5.44036	0.088175	0.192545
5.44106	6.30267	0.695239	0.091937		5.43825	0.530533	0.528229		5.44106	0.087686	0.192854
5.44176	6.3092	0.695277	0.091563		5.43895	0.530121	0.527451		5.44176	0.087635	0.193186
5.44246	6.3161	0.694961	0.091251		5.43965	0.530029	0.527145		5.44246	0.087845	0.192888
5.44316	6.32257	0.695308	0.091205		5.44036	0.529953	0.527046		5.44316	0.087665	0.192932
5.44386	6.32885	0.696197	0.090709		5.44106	0.530327	0.526787		5.44386	0.087402	0.192974
5.44456	6.33469	0.69646	0.090579		5.44176	0.530319	0.527313		5.44456	0.086891	0.193384
5.44526	6.34055	0.696849	0.091144		5.44246	0.529861	0.52729		5.44526	0.087244	0.193627
5.44597	6.3469	0.697112	0.091571		5.44316	0.529823	0.527786		5.44597	0.08752	0.19365
5.44667	6.35304	0.697082	0.091563		5.44386	0.529716	0.528419		5.44667	0.087366	0.1933
5.44737	6.35955	0.69736	0.091853		5.44456	0.529091	0.52903		5.44737	0.08733	0.192892
5.44807	6.36611	0.697585	0.092059		5.44526	0.52887	0.528938		5.44807	0.087261	0.193101
5.44877	6.37199	0.697261	0.091579		5.44597	0.528694	0.528587		5.44877	0.087042	0.19307
5.44947	6.37776	0.697822	0.091045		5.44667	0.529083	0.528229		5.44947	0.086906	0.193406
5.45017	6.3836	0.698051	0.091273		5.44737	0.528992	0.528313		5.45017	0.08629	0.193189
5.45087	6.38944	0.697887	0.091724		5.44807	0.52916	0.527794		5.45087	0.086052	0.1931
5.45158	6.39586	0.697578	0.092029		5.44877	0.529465	0.52803		5.45158	0.085438	0.193538
5.45228	6.40282	0.697574	0.092334		5.44947	0.529716	0.52816		5.45228	0.085687	0.193946
5.45298	6.40946	0.697433	0.092181		5.45017	0.529091	0.528053		5.45298	0.085613	0.194029
5.45368	6.41606	0.697593	0.09196		5.45087	0.529251	0.528122		5.45368	0.085663	0.194327
5.45438	6.42266	0.697425	0.091983		5.45158	0.529579	0.528442		5.45438	0.085831	0.194528
5.45508	6.42931	0.697822	0.091602		5.45228	0.529289	0.529198		5.45508	0.085621	0.194439
5.45578	6.43558	0.697906	0.091212		5.45298	0.5289	0.528999		5.45578	0.085834	0.194527
5.45649	6.44183	0.69791	0.09109		5.45368	0.528229	0.528763		5.45649	0.085934	0.194715
5.45719	6.44835	0.697761	0.091075		5.45438	0.527451	0.528656		5.45719	0.086149	0.194537
5.45789	6.45448	0.697517	0.091273		5.45508	0.527145	0.528725		5.45789	0.086286	0.194779
5.45859	6.46022	0.697837	0.091655		5.45578	0.527046	0.528786		5.45859	0.085998	0.194345
5.45929	6.46618	0.698146	0.091739		5.45649	0.526787	0.528763		5.45929	0.085619	0.194036
5.45999	6.47261	0.698383	0.09196		5.45719	0.527313	0.528313		5.45999	0.085647	0.193628
5.4607	6.47831	0.698608	0.092525		5.45789	0.52729	0.52787		5.4607	0.085729	0.19328
5.4614	6.48381	0.698653	0.092853		5.45859	0.527786	0.527916		5.4614	0.08542	0.192883
5.4621	6.48979	0.698661	0.092029		5.45929	0.528419	0.527725		5.4621	0.085092	0.192644
5.4628	6.49571	0.698547	0.091907		5.45999	0.52903	0.52739		5.4628	0.084614	0.193022
5.4635	6.50209	0.698802	0.091685		5.4607	0.528938	0.527222		5.4635	0.084549	0.193103
5.4642	6.5086	0.699161	0.091167		5.4614	0.528587	0.527374		5.4642	0.084209	0.193137
5.4649	6.51535	0.699596	0.091487		5.4621	0.528229	0.527832		5.4649	0.084242	0.193192
5.4656	6.52229	0.699702	0.0918		5.4628	0.528313	0.527405		5.4656	0.083652	0.193526
5.46631	6.52865	0.700301	0.091983		5.4635	0.527794	0.527229		5.46631	0.083927	0.193628
5.46701	6.53431	0.70045	0.092273		5.4642	0.52803	0.527603		5.46701	0.084049	0.193327
5.46771	6.53973	0.70042	0.092326		5.4649	0.52816	0.527969		5.46771	0.084406	0.192779
5.46841	6.54575	0.700523	0.09225		5.4656	0.528053	0.527802		5.46841	0.084253	0.192772
5.46911	6.55197	0.700683	0.091205		5.46631	0.528122	0.527786		5.46911	0.084623	0.1928
5.46981	6.55794	0.700813	0.090839		5.46701	0.528442	0.527695		5.46981	0.085209	0.193398
5.47051	6.56428	0.700721	0.091205		5.46771	0.529198	0.527687		5.47051	0.085068	0.194067
5.47121	6.57092	0.700935	0.091624		5.46841	0.528999	0.528137		5.47121	0.08493	0.194337
5.47192	6.5772	0.701156	0.091182		5.46911	0.528763	0.52787		5.47192	0.084875	0.194461
5.47262	6.58328	0.701019	0.091365		5.46981	0.528656	0.528259		5.47262	0.08535	0.194531
5.47332	6.5892	0.700626	0.091861		5.47051	0.528725	0.528343		5.47332	0.084732	0.194763
5.47402	6.5952	0.700618	0.091968		5.47121	0.528786	0.528374		5.47402	0.084448	0.194566
5.47472	6.60112	0.700507	0.091823		5.47192	0.528763	0.52813		5.47472	0.084413	0.194763
5.47542	6.6073	0.700389	0.091495		5.47262	0.528313	0.527969		5.47542	0.08514	0.194595
5.47612	6.61363	0.699691	0.091045		5.47332	0.52787	0.528023		5.47612	0.085596	0.194431
5.47683	6.6198	0.699722	0.090671		5.47402	0.527916	0.528336		5.47683	0.085163	0.194341
5.47753	6.62592	0.699905	0.09035		5.47472	0.527725	0.528336		5.47753	0.084844	0.194348
5.47823	6.63227	0.700118	0.090778		5.47542	0.52739	0.527969		5.47823	0.085005	0.194161
5.47893	6.63831	0.699897	0.091045		5.47612	0.527222	0.527596		5.47893	0.08519	0.193826
5.47963	6.64477	0.699611	0.090793		5.47683	0.527374	0.526932		5.47963	0.085304	0.193435
5.48033	6.65151	0.699863	0.091228		5.47753	0.527832	0.526657		5.48033	0.085441	0.192967
5.48104	6.65769	0.699062	0.091396		5.47823	0.527405	0.5261		5.48104	0.085489	0.193238
5.48174	6.6638	0.698428	0.091029		5.47893	0.527229	0.525208		5.48174	0.085007	0.193234
5.48244	6.66991	0.698444	0.090984		5.47963	0.527603	0.524162		5.48244	0.084713	0.193034
5.48314	6.67596	0.698478	0.091006		5.48033	0.527969	0.524216		5.48314	0.084581	0.192207
5.48384	6.68243	0.698718	0.090923		5.48104	0.527802	0.524117		5.48384	0.084864	0.191982
5.48454	6.68887	0.699027	0.091159		5.48174	0.527786	0.524223		5.48454	0.085306	0.191582
5.48524	6.69471	0.698806	0.092128		5.48244	0.527695	0.524078		5.48524	0.085911	0.191411
5.48594	6.70081	0.699195	0.091884		5.48314	0.527687	0.52459		5.48594	0.086408	0.191098
5.48665	6.7069	0.699729	0.091228		5.48384	0.528137	0.523743		5.48665	0.08634	0.191159
5.48735	6.71275	0.699973	0.091319		5.48454	0.52787	0.523369		5.48735	0.086185	0.191002
5.48805	6.7188	0.699828	0.091327		5.48524	0.528259	0.523262		5.48805	0.085697	0.191187
5.48875	6.72438	0.69995	0.091182		5.48594	0.528343	0.523209		5.48875	0.085487	0.191562
5.48945	6.73046	0.699912	0.091617		5.48665	0.528374	0.52298		5.48945	0.085628	0.190947
5.49015	6.73637	0.70021	0.091792		5.48735	0.52813	0.522041		5.49015	0.085895	0.190643
5.49085	6.74231	0.699748	0.091792		5.48805	0.527969	0.521919		5.49085	0.085838	0.19078
5.49155	6.74823	0.699798	0.091937		5.48875	0.528023	0.522583		5.49155	0.085989	0.190638
5.49226	6.75362	0.699966	0.091846		5.48945	0.528336	0.522255		5.49226	0.085806	0.190183
5.49296	6.75916	0.700008	0.092288		5.49015	0.528336	0.522026		5.49296	0.08585	0.189787
5.49366	6.76498	0.699817	0.09196		5.49085	0.527969	0.521553		5.49366	0.085731	0.189659
5.49436	6.77067	0.700107	0.091907		5.49155	0.527596	0.521378		5.49436	0.085691	0.18956
5.49506	6.77636	0.700023	0.091617		5.49226	0.526932	0.521667		5.49506	0.085872	0.189589
5.49576	6.7825	0.69992	0.091083		5.49296	0.526657	0.521912		5.49576	0.08645	0.189434
5.49646	6.78862	0.699626	0.090663		5.49366	0.5261	0.522522		5.49646	0.087051	0.189388
5.49717	6.79438	0.699748	0.090297		5.49436	0.525208	0.522835		5.49717	0.087906	0.189354
5.49787	6.80025	0.700053	0.09035		5.49506	0.524162	0.523232		5.49787	0.088055	0.188627
5.49857	6.80632	0.700214	0.090724		5.49576	0.524216	0.523293		5.49857	0.08798	0.188171
5.49927	6.81216	0.700084	0.091151		5.49646	0.524117	0.522934		5.49927	0.088369	0.187727
5.49997	6.81771	0.699889	0.091785		5.49717	0.524223	0.522552		5.49997	0.088089	0.187015
5.50067	6.82292	0.699947	0.092471		5.49787	0.524078	0.522987		5.50067	0.088177	0.185997
5.50138	6.8283	0.699653	0.092723		5.49857	0.52459	0.523148		5.50138	0.088243	0.185308
5.50208	6.8342	0.699001	0.092593		5.49927	0.523743	0.523293		5.50208	0.088169	0.185488
5.50278	6.84006	0.698928	0.092365		5.49997	0.523369	0.523186		5.50278	0.087883	0.185946
5.50348	6.84504	0.699046	0.09196		5.50067	0.523262	0.523621		5.50348	0.087894	0.185696
5.50418	6.84973	0.699165	0.091632		5.50138	0.523209	0.523888		5.50418	0.087438	0.185316
5.50488	6.8552	0.69939	0.09183		5.50208	0.52298	0.523911		5.50488	0.086761	0.184356
5.50558	6.86106	0.699405	0.092334		5.50278	0.522041	0.523712		5.50558	0.087087	0.183175
5.50628	6.86634	0.700031	0.092143		5.50348	0.521919	0.523376		5.50628	0.087116	0.182309
5.50699	6.87167	0.700008	0.091884		5.50418	0.522583	0.523483		5.50699	0.087524	0.181617
5.50769	6.87716	0.699645	0.091922		5.50488	0.522255	0.523422		5.50769	0.087801	0.181221
5.50839	6.88263	0.699454	0.092578		5.50558	0.522026	0.523361		5.50839	0.088188	0.180792
5.50909	6.8884	0.699256	0.092982		5.50628	0.521553	0.523163		5.50909	0.088175	0.18091
5.50979	6.89416	0.699218	0.092975		5.50699	0.521378	0.523453		5.50979	0.087911	0.180276
5.51049	6.89947	0.698875	0.092952		5.50769	0.521667	0.52372		5.51049	0.087297	0.180049
5.51119	6.90457	0.698775	0.092494		5.50839	0.521912	0.523552		5.51119	0.087213	0.180191
5.51189	6.9097	0.699058	0.092395		5.50909	0.522522	0.523331		5.51189	0.087131	0.180017
5.5126	6.91529	0.69884	0.092792		5.50979	0.522835	0.523384		5.5126	0.087025	0.179681
5.5133	6.92117	0.698936	0.092723		5.51049	0.523232	0.523224		5.5133	0.08696	0.179495
5.514	6.92664	0.699157	0.092654		5.51119	0.523293	0.523163		5.514	0.087116	0.179497
5.5147	6.93227	0.699413	0.092448		5.51189	0.522934	0.523285		5.5147	0.087534	0.179467
5.5154	6.93753	0.699622	0.092853		5.5126	0.522552	0.523537		5.5154	0.087322	0.179823
5.5161	6.94249	0.699847	0.092395		5.5133	0.522987	0.523369		5.5161	0.087589	0.17944
5.5168	6.94818	0.70037	0.092403		5.514	0.523148	0.523445		5.5168	0.088253	0.179515
5.51751	6.95395	0.700313	0.092639		5.5147	0.523293	0.523727		5.51751	0.08888	0.18012
5.51821	6.95913	0.700126	0.09296		5.5154	0.523186	0.523659		5.51821	0.088619	0.18085
5.51891	6.96439	0.699947	0.093143		5.5161	0.523621	0.523354		5.51891	0.088322	0.180934
5.51961	6.9698	0.700069	0.093105		5.5168	0.523888	0.523674		5.51961	0.088217	0.18128
5.52031	6.97517	0.700038	0.093402		5.51751	0.523911	0.523819		5.52031	0.088302	0.181611
5.52101	6.9807	0.699981	0.093417		5.51821	0.523712	0.52375		5.52101	0.088188	0.1815
5.52172	6.98624	0.699798	0.093654		5.51891	0.523376	0.524254		5.52172	0.0888	0.181387
5.52242	6.99153	0.699756	0.09418		5.51961	0.523483	0.524757		5.52242	0.088394	0.18155
5.52312	6.99683	0.700111	0.094409		5.52031	0.523422	0.524925		5.52312	0.088701	0.181518
5.52382	7.00241	0.70008	0.094577		5.52101	0.523361	0.524879		5.52382	0.089281	0.180506
5.52452	7.00811	0.700221	0.094653		5.52172	0.523163	0.525169		5.52452	0.08922	0.180358
5.52522	7.0134	0.700275	0.094508		5.52242	0.523453	0.525558		5.52522	0.089037	0.179916
5.52592	7.01889	0.700389	0.094539		5.52312	0.52372	0.525711		5.52592	0.088894	0.179893
5.52662	7.02471	0.700694	0.094608		5.52382	0.523552	0.525284		5.52662	0.089058	0.17971
5.52733	7.02987	0.70087	0.095096		5.52452	0.523331	0.525452		5.52733	0.088871	0.180014
5.52803	7.03618	0.700908	0.094943		5.52522	0.523384	0.525566		5.52803	0.08869	0.180069
5.52873	7.04169	0.700988	0.095172		5.52592	0.523224	0.526115		5.52873	0.08905	0.17991
5.52943	7.04742	0.70079	0.095531		5.52662	0.523163	0.526405		5.52943	0.089226	0.180003
5.53013	7.05296	0.700584	0.095981		5.52733	0.523285	0.526337		5.53013	0.088793	0.179736
5.53083	7.05823	0.700515	0.096278		5.52803	0.523537	0.526947		5.53083	0.088684	0.180116
5.53153	7.06364	0.700477	0.096416		5.52873	0.523369	0.526672		5.53153	0.088497	0.180486
5.53224	7.06911	0.700561	0.096629		5.52943	0.523445	0.526581		5.53224	0.088116	0.180673
5.53294	7.07427	0.700549	0.096912		5.53013	0.523727	0.526825		5.53294	0.087847	0.180835
5.53364	7.07948	0.700397	0.097003		5.53083	0.523659	0.526886		5.53364	0.087816	0.18113
5.53434	7.0841	0.700553	0.097354		5.53153	0.523354	0.527107		5.53434	0.087332	0.181397
5.53504	7.08928	0.700801	0.097469		5.53224	0.523674	0.527237		5.53504	0.087709	0.181831
5.53574	7.09443	0.700935	0.097522		5.53294	0.523819	0.526779		5.53574	0.088295	0.181884
5.53644	7.10018	0.701129	0.097369		5.53364	0.52375	0.526642		5.53644	0.088482	0.181531
5.53714	7.10544	0.701408	0.096851		5.53434	0.524254	0.52681		5.53714	0.088678	0.181198
5.53785	7.11046	0.701785	0.096347		5.53504	0.524757	0.526901		5.53785	0.088558	0.181129
5.53855	7.11545	0.702052	0.095973		5.53574	0.524925	0.526649		5.53855	0.088083	0.18093
5.53925	7.12075	0.702289	0.095927		5.53644	0.524879	0.526558		5.53925	0.087999	0.180661
5.53995	7.1259	0.702422	0.096393		5.53714	0.525169	0.526627		5.53995	0.088346	0.180718
5.54065	7.13076	0.702781	0.096744		5.53785	0.525558	0.526672		5.54065	0.08827	0.180975
5.54135	7.13611	0.702766	0.096431		5.53855	0.525711	0.526917		5.54135	0.088175	0.181564
5.54205	7.14148	0.702293	0.096538		5.53925	0.525284	0.527		5.54205	0.087559	0.181685
5.54276	7.14682	0.70209	0.096873		5.53995	0.525452	0.527016		5.54276	0.086893	0.182194
5.54346	7.15213	0.702361	0.096873		5.54065	0.525566	0.527275		5.54346	0.086462	0.182254
5.54416	7.15743	0.702686	0.096881		5.54135	0.526115	0.527573		5.54416	0.086634	0.181601
5.54486	7.16278	0.702731	0.096545		5.54205	0.526405	0.527458		5.54486	0.086761	0.181696
5.54556	7.16806	0.70288	0.095958		5.54276	0.526337	0.52713		5.54556	0.086847	0.181851
5.54626	7.17355	0.703246	0.095859		5.54346	0.526947	0.527344		5.54626	0.086624	0.182094
5.54696	7.17908	0.703246	0.095828		5.54416	0.526672	0.527618		5.54696	0.087044	0.182301
5.54767	7.18417	0.703166	0.095851		5.54486	0.526581	0.527878		5.54767	0.086897	0.18275
5.54837	7.1887	0.703109	0.096034		5.54556	0.526825	0.528481		5.54837	0.086696	0.183143
5.54907	7.19387	0.702884	0.095966		5.54626	0.526886	0.529366		5.54907	0.086498	0.183462
5.54977	7.19883	0.702609	0.09608		5.54696	0.527107	0.529755		5.54977	0.086284	0.183325
5.55047	7.20416	0.702537	0.095912		5.54767	0.527237	0.529381		5.55047	0.086376	0.182673
5.55117	7.20942	0.70285	0.095912		5.54837	0.526779	0.529564		5.55117	0.086006	0.182743
5.55187	7.21466	0.702968	0.095142		5.54907	0.526642	0.530006		5.55187	0.085272	0.183007
5.55258	7.21967	0.703056	0.095584		5.54977	0.52681	0.530457		5.55258	0.084617	0.182631
5.55328	7.22518	0.703254	0.095752		5.55047	0.526901	0.530785		5.55328	0.084413	0.182968
5.55398	7.23102	0.703052	0.096049		5.55117	0.526649	0.53093		5.55398	0.084743	0.183097
5.55468	7.23632	0.702705	0.095576		5.55187	0.526558	0.530724		5.55468	0.0846	0.183573
5.55538	7.24167	0.702617	0.095424		5.55258	0.526627	0.530632		5.55538	0.084179	0.18367
5.55608	7.24697	0.70264	0.095851		5.55328	0.526672	0.53096		5.55608	0.08403	0.183929
5.55678	7.25131	0.702731	0.09518		5.55398	0.526917	0.53141		5.55678	0.083998	0.184289
5.55748	7.25541	0.70238	0.09492		5.55468	0.527	0.531464		5.55748	0.084097	0.184335
5.55819	7.26053	0.701865	0.095325		5.55538	0.527016	0.531151		5.55819	0.084009	0.184429
5.55889	7.26592	0.701846	0.095287		5.55608	0.527275	0.530899		5.55889	0.083406	0.184848
5.55959	7.27094	0.701953	0.094943		5.55678	0.527573	0.530746		5.55959	0.083082	0.18519
5.56029	7.27618	0.701881	0.094585		5.55748	0.527458	0.530479		5.56029	0.082853	0.186138
5.56099	7.28132	0.701591	0.094539		5.55819	0.52713	0.530304		5.56099	0.082929	0.186213
5.56169	7.28653	0.70119	0.094432		5.55889	0.527344	0.530586		5.56169	0.08271	0.186264
5.56239	7.29233	0.700717	0.094348		5.55959	0.527618	0.530678		5.56239	0.082868	0.186006
5.5631	7.29715	0.700542	0.094318		5.56029	0.527878	0.530685		5.5631	0.082741	0.186352
5.5638	7.30209	0.700832	0.094218		5.56099	0.528481	0.530678		5.5638	0.082708	0.186602
5.5645	7.3071	0.701175	0.094203		5.56169	0.529366	0.530792		5.5645	0.082704	0.186654
5.5652	7.31239	0.701053	0.093982		5.56239	0.529755	0.531105		5.5652	0.08262	0.187163
5.5659	7.31743	0.700732	0.093631		5.5631	0.529381	0.530891		5.5659	0.082575	0.187321
5.5666	7.32243	0.70053	0.093555		5.5638	0.529564	0.530434		5.5666	0.082653	0.187444
5.5673	7.32745	0.700404	0.093585		5.5645	0.530006	0.530167		5.5673	0.082647	0.18666
5.56801	7.33225	0.70066	0.093745		5.5652	0.530457	0.530167		5.56801	0.08238	0.186865
5.56871	7.33749	0.700488	0.093867		5.5659	0.530785	0.53054		5.56871	0.082081	0.18769
5.56941	7.34263	0.70045	0.093982		5.5666	0.53093	0.530685		5.56941	0.08242	0.188241
5.57011	7.34757	0.699985	0.09386		5.5673	0.530724	0.530586		5.57011	0.081953	0.188538
5.57081	7.3525	0.699527	0.093715		5.56801	0.530632	0.530685		5.57081	0.081497	0.189349
5.57151	7.35731	0.699302	0.0937		5.56871	0.53096	0.530617		5.57151	0.080797	0.190109
5.57221	7.36222	0.699084	0.093585		5.56941	0.53141	0.530022		5.57221	0.080395	0.190277
5.57292	7.36729	0.699126	0.094066		5.57011	0.531464	0.529915		5.57292	0.080507	0.189558
5.57362	7.37246	0.699283	0.094081		5.57081	0.531151	0.529831		5.57362	0.080738	0.189036
5.57432	7.37737	0.699115	0.094272		5.57151	0.530899	0.529282		5.57432	0.081081	0.189068
5.57502	7.38263	0.698943	0.0946		5.57221	0.530746	0.529259		5.57502	0.081198	0.189001
5.57572	7.38781	0.698619	0.094524		5.57292	0.530479	0.529541		5.57572	0.081274	0.189187
5.57642	7.39294	0.698474	0.094066		5.57362	0.530304	0.529427		5.57642	0.08143	0.189345
5.57712	7.39806	0.698493	0.094142		5.57432	0.530586	0.52961		5.57712	0.081552	0.189528
5.57782	7.4026	0.698791	0.093974		5.57502	0.530678	0.529533		5.57782	0.081741	0.189323
5.57853	7.40729	0.699187	0.093738		5.57572	0.530685	0.529144		5.57853	0.08194	0.189745
5.57923	7.41176	0.699355	0.094043		5.57642	0.530678	0.528725		5.57923	0.081831	0.190053
5.57993	7.41647	0.699691	0.093898		5.57712	0.530792	0.528709		5.57993	0.081831	0.189768
5.58063	7.42173	0.699592	0.093799		5.57782	0.531105	0.5289		5.58063	0.081846	0.189183
5.58133	7.4263	0.699504	0.094028		5.57853	0.530891	0.528793		5.58133	0.08197	0.188823
5.58203	7.43093	0.699313	0.093974		5.57923	0.530434	0.52829		5.58203	0.081693	0.188171
5.58273	7.43585	0.699138	0.093845		5.57993	0.530167	0.527832		5.58273	0.081781	0.188052
5.58344	7.44078	0.698672	0.094119		5.58063	0.530167	0.527321		5.58344	0.082371	0.187325
5.58414	7.44522	0.698821	0.094264		5.58133	0.53054	0.526909		5.58414	0.082546	0.187593
5.58484	7.45021	0.698814	0.094272		5.58203	0.530685	0.526604		5.58484	0.082483	0.187903
5.58554	7.45525	0.698737	0.094257		5.58273	0.530586	0.526665		5.58554	0.082458	0.188146
5.58624	7.46017	0.698161	0.094318		5.58344	0.530685	0.526917		5.58624	0.082645	0.18818
5.58694	7.46505	0.697505	0.09444		5.58414	0.530617	0.526787		5.58694	0.082998	0.187537
5.58764	7.47023	0.697322	0.094875		5.58484	0.530022	0.526566		5.58764	0.083179	0.186975
5.58835	7.4747	0.69728	0.095531		5.58554	0.529915	0.526199		5.58835	0.083517	0.186405
5.58905	7.47947	0.697044	0.095622		5.58624	0.529831	0.526062		5.58905	0.08365	0.186178
5.58975	7.4841	0.697276	0.095462		5.58694	0.529282	0.526222		5.58975	0.083351	0.185394
5.59045	7.48881	0.697604	0.095241		5.58764	0.529259	0.52636		5.59045	0.083254	0.184958
5.59115	7.49346	0.697639	0.09537		5.58835	0.529541	0.526421		5.59115	0.083282	0.184648
5.59185	7.49814	0.697601	0.095134		5.58905	0.529427	0.525856		5.59185	0.083103	0.184222
5.59255	7.5033	0.697356	0.095096		5.58975	0.52961	0.525482		5.59255	0.083208	0.183546
5.59326	7.508	0.697543	0.095477		5.59045	0.529533	0.525665		5.59326	0.083423	0.183983
5.59396	7.5125	0.697936	0.095538		5.59115	0.529144	0.525673		5.59396	0.083517	0.184363
5.59466	7.5173	0.697799	0.094859		5.59185	0.528725	0.525208		5.59466	0.083647	0.184115
5.59536	7.52163	0.697654	0.094516		5.59255	0.528709	0.524818		5.59536	0.083944	0.184061
5.59606	7.52634	0.698245	0.094691		5.59326	0.5289	0.524734		5.59606	0.083433	0.184304
5.59676	7.53091	0.698814	0.094524		5.59396	0.528793	0.524399		5.59676	0.083162	0.183981
5.59746	7.53493	0.699493	0.09444		5.59466	0.52829	0.52433		5.59746	0.082868	0.183963
5.59816	7.53943	0.700298	0.094623		5.59536	0.527832	0.524567		5.59816	0.082577	0.183249
5.59887	7.5442	0.700626	0.09444		5.59606	0.527321	0.524643		5.59887	0.082149	0.183044
5.59957	7.54851	0.700622	0.094615		5.59676	0.526909	0.524521		5.59957	0.081697	0.183277
5.60027	7.55315	0.700664	0.095012		5.59746	0.526604	0.524185		5.60027	0.081491	0.182962
5.60097	7.55803	0.701297	0.095386		5.59816	0.526665	0.523964		5.60097	0.081215	0.182773
5.60167	7.56307	0.702052	0.095821		5.59887	0.526917	0.523972		5.60167	0.08102	0.182521
5.60237	7.56783	0.702609	0.095744		5.59957	0.526787	0.524208		5.60237	0.081013	0.182746
5.60307	7.57235	0.702838	0.095195		5.60027	0.526566	0.524048		5.60307	0.081398	0.182755
5.60378	7.57681	0.703098	0.094806		5.60097	0.526199	0.523514		5.60378	0.081302	0.181854
5.60448	7.58149	0.703571	0.094928		5.60167	0.526062	0.523384		5.60448	0.080938	0.181127
5.60518	7.58604	0.703693	0.094951		5.60237	0.526222	0.523705		5.60518	0.081201	0.180139
5.60588	7.59087	0.703708	0.095439		5.60307	0.52636	0.523773		5.60588	0.08111	0.179001
5.60658	7.59553	0.703559	0.09563		5.60378	0.526421	0.523643		5.60658	0.080885	0.178681
5.60728	7.60032	0.70375	0.095561		5.60448	0.525856	0.52343		5.60728	0.081089	0.178398
5.60798	7.60528	0.703757	0.042117		5.60518	0.525482	0.522758		5.60798	0.081314	0.178692
5.60869	7.60992	0.703204	0.042064		5.60588	0.525665	0.522316		5.60869	0.081297	0.179231
5.60939	7.61456	0.702861	0.042117		5.60658	0.525673	0.522781		5.60939	0.080936	0.179376
5.61009	7.61887	0.703086	0.042255		5.60728	0.525208	0.522728		5.61009	0.080644	0.17947
5.61079	7.62286	0.703422	0.042972		5.60798	0.524818	0.522324		5.61079	0.080278	0.179688
5.61149	7.62692	0.703571	0.043605		5.60869	0.524734	0.522232		5.61149	0.079914	0.179575
5.61219	7.63113	0.703914	0.043674		5.60939	0.524399	0.521782		5.61219	0.079824	0.179247
5.61289	7.63543	0.70396	0.043781		5.61009	0.52433	0.521507		5.61289	0.079775	0.178941
5.6136	7.6402	0.703941	0.043552		5.61079	0.524567	0.521385		5.6136	0.079809	0.178411
5.6143	7.64442	0.703716	0.043575		5.61149	0.524643	0.521149		5.6143	0.079962	0.177987
5.615	7.64916	0.703155	0.043605		5.61219	0.524521	0.520966		5.615	0.079983	0.178411
5.6157	7.65339	0.702888	0.043674		5.61289	0.524185	0.520668		5.6157	0.079943	0.178898
5.6164	7.65753	0.703128	0.044276		5.6136	0.523964	0.520325		5.6164	0.079975	0.179168
5.6171	7.66204	0.703216	0.0442		5.6143	0.523972	0.520294		5.6171	0.080026	0.178926
5.6178	7.66651	0.703323	0.044612		5.615	0.524208	0.520287		5.6178	0.080118	0.179053
5.6185	7.67083	0.703765	0.044872		5.6157	0.524048	0.520241		5.6185	0.079773	0.17917
5.61921	7.67543	0.703712	0.044849		5.6164	0.523514	0.520203		5.61921	0.079435	0.178727
5.61991	7.68024	0.703403	0.045207		5.6171	0.523384	0.520317		5.61991	0.079504	0.178315
5.62061	7.68488	0.703525	0.045474		5.6178	0.523705	0.520821		5.62061	0.079378	0.178699
5.62131	7.68926	0.703693	0.045757		5.6185	0.523773	0.520683		5.62131	0.079351	0.178527
5.62201	7.69347	0.704292	0.045795		5.61921	0.523643	0.52037		5.62201	0.079235	0.178441
5.62271	7.69725	0.70499	0.046008		5.61991	0.52343	0.520287		5.62271	0.079098	0.178588
5.62341	7.70135	0.705623	0.046336		5.62061	0.522758	0.52018		5.62341	0.079111	0.178559
5.62411	7.70584	0.706088	0.046443		5.62131	0.522316	0.520317		5.62411	0.079075	0.178529
5.62482	7.70936	0.706149	0.046504		5.62201	0.522781	0.520241		5.62482	0.079372	0.178916
5.62552	7.71408	0.706073	0.046886		5.62271	0.522728	0.519791		5.62552	0.079763	0.179077
5.62622	7.71796	0.706485	0.046878		5.62341	0.522324	0.519836		5.62622	0.079689	0.1795
5.62692	7.72183	0.707198	0.046809		5.62411	0.522232	0.520119		5.62692	0.079601	0.179857
5.62762	7.72635	0.706832	0.04742		5.62482	0.521782	0.520065		5.62762	0.079618	0.179808
5.62832	7.73056	0.707057	0.047954		5.62552	0.521507	0.519997		5.62832	0.0797	0.179388
5.62903	7.73522	0.707248	0.04816		5.62622	0.521385	0.520287		5.62903	0.079874	0.178749
5.62973	7.7398	0.707668	0.048419		5.62692	0.521149	0.520721		5.62973	0.080028	0.178756
5.63043	7.74415	0.708522	0.048785		5.62762	0.520966	0.520836		5.63043	0.080108	0.178539
5.63113	7.74887	0.708636	0.049396		5.62832	0.520668	0.520546		5.63113	0.080471	0.178111
5.63183	7.7526	0.708995	0.049747		5.62903	0.520325	0.520241		5.63183	0.080852	0.177888
5.63253	7.7572	0.708827	0.049884		5.62973	0.520294	0.520073		5.63253	0.080976	0.17817
5.63323	7.7618	0.707992	0.049731		5.63043	0.520287	0.519585		5.63323	0.081156	0.17892
5.63394	7.76626	0.708011	0.049915		5.63113	0.520241	0.519394		5.63394	0.08106	0.178859
5.63464	7.77037	0.708114	0.049411		5.63183	0.520203	0.519768		5.63464	0.080847	0.178658
5.63534	7.77461	0.708022	0.049411		5.63253	0.520317	0.519966		5.63534	0.080898	0.178791
5.63604	7.77826	0.707889	0.049075		5.63323	0.520821	0.520042		5.63604	0.08094	0.178496
5.63674	7.78252	0.707671	0.049335		5.63394	0.520683	0.520416		5.63674	0.080641	0.178559
5.63744	7.78657	0.707332	0.049472		5.63464	0.52037	0.520264		5.63744	0.080459	0.178552
5.63814	7.7905	0.707301	0.04938		5.63534	0.520287	0.520424		5.63814	0.080366	0.178337
5.63884	7.79527	0.707427	0.048999		5.63604	0.52018	0.520912		5.63884	0.080601	0.177809
5.63955	7.79966	0.707614	0.049014		5.63674	0.520317	0.521004		5.63955	0.081053	0.177433
5.64025	7.80364	0.707587	0.049319		5.63744	0.520241	0.520882		5.64025	0.080923	0.178071
5.64095	7.80874	0.708171	0.049365		5.63814	0.519791	0.521034		5.64095	0.081117	0.178953
5.64165	7.81268	0.70848	0.049464		5.63884	0.519836	0.521034		5.64165	0.081642	0.179174
5.64235	7.81704	0.708507	0.049716		5.63955	0.520119	0.521194		5.64235	0.081915	0.179309
5.64305	7.82125	0.708461	0.049777		5.64025	0.520065	0.521973		5.64305	0.081892	0.17926
5.64375	7.82484	0.70864	0.050075		5.64095	0.519997	0.522568		5.64375	0.082031	0.179175
5.64445	7.82912	0.708789	0.050899		5.64165	0.520287	0.522446		5.64445	0.08222	0.178882
5.64516	7.83319	0.70901	0.050792		5.64235	0.520721	0.522621		5.64516	0.08221	0.178902
5.64586	7.8368	0.709068	0.050624		5.64305	0.520836	0.523247		5.64586	0.082428	0.178074
5.64656	7.84068	0.709113	0.0507		5.64375	0.520546	0.523232		5.64656	0.082405	0.177385
5.64726	7.84409	0.708472	0.050204		5.64445	0.520241	0.523048		5.64726	0.08235	0.177787
5.64796	7.84875	0.708141	0.050327		5.64516	0.520073	0.523079		5.64796	0.082424	0.17756
5.64866	7.85267	0.708633	0.050937		5.64586	0.519585	0.523956		5.64866	0.082514	0.177349
5.64937	7.8569	0.7084	0.051273		5.64656	0.519394	0.524811		5.64937	0.082502	0.177271
5.65007	7.86099	0.708499	0.05173		5.64726	0.519768	0.524757		5.65007	0.082277	0.176828
5.65077	7.86533	0.709026	0.051677		5.64796	0.519966	0.524811		5.65077	0.082256	0.176524
5.65147	7.86899	0.709296	0.051303		5.64866	0.520042	0.52536		5.65147	0.082228	0.176244
5.65217	7.87331	0.709274	0.051212		5.64937	0.520416	0.525963		5.65217	0.082258	0.176799
5.65287	7.8776	0.709308	0.051204		5.65007	0.520264	0.526512		5.65287	0.081962	0.176346
5.65357	7.88247	0.709304	0.051601		5.65077	0.520424	0.526825		5.65357	0.081713	0.176218
5.65428	7.88647	0.709346	0.052074		5.65147	0.520912	0.526901		5.65428	0.08169	0.176024
5.65498	7.89022	0.709365	0.052394		5.65217	0.521004	0.526733		5.65498	0.081533	0.175562
5.65568	7.89396	0.709109	0.052745		5.65287	0.520882	0.526428		5.65568	0.081413	0.17497
5.65638	7.89749	0.70935	0.052585		5.65357	0.521034	0.526253		5.65638	0.080925	0.175191
5.65708	7.90235	0.709129	0.052463		5.65428	0.521034	0.526566		5.65708	0.080599	0.175603
5.65778	7.90688	0.708366	0.052249		5.65498	0.521194	0.526474		5.65778	0.080892	0.176073
5.65848	7.91079	0.707515	0.052142		5.65568	0.521973	0.526611		5.65848	0.080982	0.176109
5.65918	7.91477	0.707397	0.052333		5.65638	0.522568	0.526772		5.65918	0.080892	0.176494
5.65989	7.91927	0.70716	0.052791		5.65708	0.522446	0.526924		5.65989	0.080671	0.17617
5.66059	7.92309	0.707076	0.053363		5.65778	0.522621	0.527512		5.66059	0.080406	0.175971
5.66129	7.92709	0.706752	0.053851		5.65848	0.523247	0.52742		5.66129	0.080236	0.175675
5.66199	7.93138	0.705821	0.054095		5.65918	0.523232	0.527092		5.66199	0.079922	0.174921
5.66269	7.93522	0.706203	0.054012		5.65989	0.523048	0.526924		5.66269	0.079443	0.174903
5.66339	7.9383	0.706016	0.054149		5.66059	0.523079	0.526886		5.66339	0.078693	0.174551
5.66409	7.9413	0.705905	0.054324		5.66129	0.523956	0.526894		5.66409	0.078266	0.17416
5.66479	7.94469	0.705032	0.054164		5.66199	0.524811	0.52668		5.66479	0.078087	0.173796
5.6655	7.94837	0.704375	0.054561		5.66269	0.524757	0.526817		5.6655	0.077568	0.173373
5.6662	7.9519	0.703933	0.054515		5.66339	0.524811	0.527382		5.6662	0.077259	0.173409
5.6669	7.95601	0.703288	0.054271		5.66409	0.52536	0.527588		5.6669	0.076721	0.173657
5.6676	7.95964	0.702892	0.053951		5.66479	0.525963	0.5271		5.6676	0.076521	0.173245
5.6683	7.96344	0.703189	0.05331		5.6655	0.526512	0.527206		5.6683	0.076618	0.172758
5.669	7.96728	0.703288	0.053104		5.6662	0.526825	0.527214		5.669	0.076612	0.17258
5.66971	7.97126	0.703174	0.053432		5.6669	0.526901	0.526833		5.66971	0.076767	0.172553
5.67041	7.97536	0.702995	0.053966		5.6676	0.526733	0.526627		5.67041	0.077053	0.172351
5.67111	7.9798	0.702609	0.054301		5.6683	0.526428	0.526588		5.67111	0.077209	0.172106
5.67181	7.98365	0.702506	0.054012		5.669	0.526253	0.526703		5.67181	0.077173	0.171429
5.67251	7.98738	0.702853	0.054073		5.66971	0.526566	0.526886		5.67251	0.077196	0.171035
5.67321	7.99144	0.703139	0.054134		5.67041	0.526474	0.526703		5.67321	0.077301	0.170903
5.67391	7.99519	0.702956	0.054591		5.67111	0.526611	0.526596		5.67391	0.077129	0.171413
5.67462	7.99878	0.702419	0.054378		5.67181	0.526772	0.526428		5.67462	0.076685	0.171803
5.67532	8.00217	0.702075	0.05482		5.67251	0.526924	0.526093		5.67532	0.076944	0.171422
5.67602	8.00546	0.701972	0.054446		5.67321	0.527512	0.525711		5.67602	0.077041	0.171204
5.67672	8.00906	0.701877	0.05434		5.67391	0.52742	0.525665		5.67672	0.076729	0.170929
5.67742	8.01272	0.701831	0.054691		5.67462	0.527092	0.525925		5.67742	0.076124	0.170636
5.67812	8.01621	0.701572	0.054355		5.67532	0.526924	0.525139		5.67812	0.075561	0.17042
5.67882	8.01988	0.701331	0.054279		5.67602	0.526886	0.524651		5.67882	0.075834	0.170127
5.67952	8.02317	0.701228	0.054103		5.67672	0.526894	0.524277		5.67952	0.07617	0.170264
5.68023	8.02669	0.701423	0.053897		5.67742	0.52668	0.523811		5.68023	0.075834	0.170149
5.68093	8.03033	0.701446	0.054271		5.67812	0.526817	0.523666		5.68093	0.075071	0.170624
5.68163	8.03421	0.701144	0.054599		5.67882	0.527382	0.52343		5.68163	0.07493	0.171253
5.68233	8.03828	0.700889	0.054889		5.67952	0.527588	0.523651		5.68233	0.074688	0.171039
5.68303	8.04181	0.701144	0.055339		5.68023	0.5271	0.523682		5.68303	0.074514	0.171079
5.68373	8.04543	0.70116	0.055537		5.68093	0.527206	0.522774		5.68373	0.074713	0.171649
5.68443	8.04953	0.700755	0.055125		5.68163	0.527214	0.522316		5.68443	0.074528	0.172173
5.68513	8.05318	0.700717	0.05482		5.68233	0.526833	0.522438		5.68513	0.074516	0.171949
5.68584	8.05651	0.700767	0.054843		5.68303	0.526627	0.522041		5.68584	0.074818	0.171979
5.68654	8.06038	0.700607	0.05479		5.68373	0.526588	0.521828		5.68654	0.074566	0.172095
5.68724	8.064	0.700401	0.054927		5.68443	0.526703	0.521683		5.68724	0.074261	0.171884
5.68794	8.06747	0.700198	0.055804		5.68513	0.526886	0.521568		5.68794	0.074451	0.171803
5.68864	8.07045	0.700034	0.056499		5.68584	0.526703	0.521515		5.68864	0.074293	0.171746
5.68934	8.07379	0.700015	0.05717		5.68654	0.526596	0.520882		5.68934	0.073854	0.171885
5.69004	8.07722	0.70029	0.056918		5.68724	0.526428	0.521118		5.69004	0.073469	0.172325
5.69075	8.08051	0.700202	0.056865		5.68794	0.526093	0.52095		5.69075	0.073461	0.172845
5.69145	8.08414	0.700309	0.056544		5.68864	0.525711	0.52095		5.69145	0.074009	0.172905
5.69215	8.08747	0.700164	0.056705		5.68934	0.525665	0.521133		5.69215	0.074737	0.172537
5.69285	8.09078	0.700156	0.057437		5.69004	0.525925	0.521103		5.69285	0.074566	0.171974
5.69355	8.09438	0.700263	0.057376		5.69075	0.525139	0.520943		5.69355	0.07424	0.171512
5.69425	8.09794	0.700378	0.057635		5.69145	0.524651	0.520615		5.69425	0.074209	0.170803
5.69496	8.10093	0.700412	0.057742		5.69215	0.524277	0.520111		5.69496	0.074497	0.170429
5.69566	8.10403	0.700656	0.05759		5.69285	0.523811	0.519936		5.69566	0.074795	0.170136
5.69636	8.10767	0.700961	0.057079		5.69355	0.523666	0.520073		5.69636	0.075115	0.169804
5.69706	8.11115	0.700885	0.05701		5.69425	0.52343	0.520935		5.69706	0.075596	0.16973
5.69776	8.11432	0.700702	0.056781		5.69496	0.523651	0.521133		5.69776	0.075893	0.169847
5.69846	8.11795	0.700317	0.056857		5.69566	0.523682	0.521217		5.69846	0.076395	0.16995
5.69916	8.12146	0.700252	0.057269		5.69636	0.522774	0.520943		5.69916	0.076914	0.170029
5.69986	8.12484	0.700504	0.057437		5.69706	0.522316	0.521019		5.69986	0.077062	0.169888
5.70057	8.12817	0.700595	0.057849		5.69776	0.522438	0.521355		5.70057	0.07723	0.170073
5.70127	8.13165	0.700546	0.05791		5.69846	0.522041	0.521301		5.70127	0.077255	0.169602
5.70197	8.13562	0.700786	0.057658		5.69916	0.521828	0.5215		5.70197	0.077638	0.16908
5.70267	8.1394	0.70119	0.057559		5.69986	0.521683	0.522491		5.70267	0.077919	0.169211
5.70337	8.14264	0.701312	0.057513		5.70057	0.521568	0.522781		5.70337	0.078119	0.169022
5.70407	8.14584	0.70106	0.057536		5.70127	0.521515	0.522675		5.70407	0.078308	0.169127
5.70477	8.1492	0.70079	0.057735		5.70197	0.520882	0.522736		5.70477	0.07868	0.168864
5.70547	8.15261	0.700904	0.05788		5.70267	0.521118	0.52317		5.70547	0.078516	0.168282
5.70618	8.1554	0.701408	0.057857		5.70337	0.52095	0.523102		5.70618	0.078375	0.16785
5.70688	8.15833	0.701869	0.057857		5.70407	0.52095	0.523087		5.70688	0.078403	0.168025
5.70758	8.16175	0.701831	0.058032		5.70477	0.521133	0.523369		5.70758	0.078192	0.168376
5.70828	8.16508	0.70132	0.058353		5.70547	0.521103	0.523773		5.70828	0.077741	0.168601
5.70898	8.16814	0.701003	0.058467		5.70618	0.520943	0.523544		5.70898	0.077951	0.168452
5.70968	8.17133	0.701282	0.058437		5.70688	0.520615	0.52359		5.70968	0.078195	0.167981
5.71038	8.17475	0.701392	0.058284		5.70758	0.520111	0.523949		5.71038	0.07778	0.167622
5.71109	8.17781	0.701678	0.058887		5.70828	0.519936	0.524109		5.71109	0.077709	0.167122
5.71179	8.18067	0.701572	0.059428		5.70898	0.520073	0.524384		5.71179	0.078152	0.166853
5.71249	8.1838	0.701137	0.059962		5.70968	0.520935	0.525002		5.71249	0.078798	0.166767
5.71319	8.18712	0.701419	0.060207		5.71038	0.521133	0.525627		5.71319	0.078878	0.166159
5.71389	8.19025	0.701652	0.060313		5.71109	0.521217	0.526039		5.71389	0.078264	0.165999
5.71459	8.19357	0.702136	0.061023		5.71179	0.520943	0.526405		5.71459	0.078024	0.165835
5.71529	8.19679	0.702403	0.061382		5.71249	0.521019	0.526527		5.71529	0.078731	0.16587
5.716	8.19985	0.701938	0.061687		5.71319	0.521355	0.526642		5.716	0.079361	0.165913
5.7167	8.20284	0.701556	0.061923		5.71389	0.521301	0.526947		5.7167	0.079334	0.165434
5.7174	8.20581	0.701602	0.06245		5.71459	0.5215	0.526794		5.7174	0.079719	0.164927
5.7181	8.20872	0.701354	0.06293		5.71529	0.522491	0.527214		5.7181	0.080089	0.164564
5.7188	8.21168	0.701366	0.063533		5.716	0.522781	0.527275		5.7188	0.080211	0.164245
5.7195	8.21484	0.701762	0.063716		5.7167	0.522675	0.526993		5.7195	0.080076	0.163958
5.7202	8.21717	0.702258	0.063808		5.7174	0.522736	0.527145		5.7202	0.080011	0.164281
5.72091	8.21999	0.702159	0.064014		5.7181	0.52317	0.527832		5.72091	0.079834	0.164926
5.72161	8.22324	0.702132	0.064456		5.7188	0.523102	0.527748		5.72161	0.080051	0.165337
5.72231	8.22665	0.701949	0.064265		5.7195	0.523087	0.527817		5.72231	0.080368	0.165738
5.72301	8.22992	0.702209	0.064235		5.7202	0.523369	0.527		5.72301	0.080223	0.166517
5.72371	8.23291	0.702621	0.064197		5.72091	0.523773	0.527245		5.72371	0.080921	0.166846
5.72441	8.23657	0.702647	0.0638		5.72161	0.523544	0.527565		5.72441	0.081596	0.166753
5.72511	8.23971	0.702289	0.063564		5.72231	0.52359	0.527893		5.72511	0.081888	0.166822
5.72581	8.24286	0.702628	0.063892		5.72301	0.523949	0.52829		5.72581	0.082022	0.166322
5.72652	8.24619	0.702857	0.06393		5.72371	0.524109	0.528465		5.72652	0.081961	0.165663
5.72722	8.24868	0.702956	0.063731		5.72441	0.524384	0.529037		5.72722	0.081419	0.165551
5.72792	8.25137	0.703139	0.063411		5.72511	0.525002	0.529579		5.72792	0.08119	0.165822
5.72862	8.25423	0.703979	0.063197		5.72581	0.525627	0.530113		5.72862	0.08127	0.165905
5.72932	8.25726	0.70436	0.063434		5.72652	0.526039	0.530342		5.72932	0.081297	0.166108
5.73002	8.26062	0.704349	0.063678		5.72722	0.526405	0.530296		5.73002	0.081032	0.166617
5.73072	8.26423	0.704486	0.063731		5.72792	0.526527	0.529976		5.73072	0.081081	0.16676
5.73143	8.2674	0.704684	0.063869		5.72862	0.526642	0.53006		5.73143	0.081291	0.166903
5.73213	8.27013	0.704196	0.064044		5.72932	0.526947	0.529045		5.73213	0.081213	0.167263
5.73283	8.27301	0.703998	0.06454		5.73002	0.526794	0.528931		5.73283	0.081282	0.167371
5.73353	8.27637	0.704032	0.064639		5.73072	0.527214	0.528709		5.73353	0.081732	0.167689
5.73423	8.27979	0.704467	0.065166		5.73143	0.527275	0.528671		5.73423	0.081751	0.168009
5.73493	8.28261	0.704227	0.065623		5.73213	0.526993	0.529053		5.73493	0.0814	0.168185
5.73563	8.2861	0.704559	0.065982		5.73283	0.527145	0.528778		5.73563	0.081392	0.168102
5.73634	8.2889	0.704833	0.066058		5.73353	0.527832	0.528824		5.73634	0.081594	0.168269
5.73704	8.29238	0.705051	0.066196		5.73423	0.527748	0.528114		5.73704	0.08152	0.168185
5.73774	8.29412	0.704654	0.066524		5.73493	0.527817	0.527596		5.73774	0.081524	0.167791
5.73844	8.29696	0.704948	0.06692		5.73563	0.527	0.527237		5.73844	0.081314	0.167596
5.73914	8.30024	0.705104	0.067249		5.73634	0.527245	0.527435		5.73914	0.08144	0.167462
5.73984	8.30361	0.705116	0.067317		5.73704	0.527565	0.527519		5.73984	0.081556	0.167406
5.74054	8.30654	0.705127	0.067592		5.73774	0.527893	0.526848		5.74054	0.082252	0.167474
5.74125	8.30972	0.704215	0.068057		5.73844	0.52829	0.526855		5.74125	0.082559	0.167592
5.74195	8.31271	0.703902	0.068324		5.73914	0.528465	0.526825		5.74195	0.082886	0.167752
5.74265	8.31577	0.703258	0.068538		5.73984	0.529037	0.526344		5.74265	0.083113	0.16754
5.74335	8.31848	0.703166	0.068866		5.74054	0.529579	0.526207		5.74335	0.08365	0.166902
5.74405	8.32134	0.703353	0.069034		5.74125	0.530113	0.526245		5.74405	0.08362	0.16647
5.74475	8.3245	0.70322	0.068835		5.74195	0.530342	0.526695		5.74475	0.083828	0.166739
5.74545	8.32741	0.702708	0.069057		5.74265	0.530296	0.526642		5.74545	0.084131	0.167205
5.74615	8.33051	0.702151	0.069423		5.74335	0.529976	0.526535		5.74615	0.084165	0.167407
5.74686	8.3333	0.701965	0.069873		5.74405	0.53006	0.526596		5.74686	0.08394	0.167449
5.74756	8.33632	0.701835	0.070041		5.74475	0.529045	0.526726		5.74756	0.083799	0.167511
5.74826	8.33927	0.701526	0.07027		5.74545	0.528931	0.526665		5.74826	0.083929	0.167926
5.74896	8.34207	0.701438	0.070255		5.74615	0.528709	0.526947		5.74896	0.084074	0.167675
5.74966	8.34497	0.701991	0.070781		5.74686	0.528671	0.527328		5.74966	0.083992	0.167514
5.75036	8.34792	0.701446	0.071567		5.74756	0.529053	0.527908		5.75036	0.083679	0.167545
5.75106	8.35096	0.701499	0.071925		5.74826	0.528778	0.527664		5.75106	0.083771	0.167364
5.75177	8.35361	0.701919	0.072528		5.74896	0.528824	0.527458		5.75177	0.083959	0.16775
5.75247	8.35629	0.702167	0.073116		5.74966	0.528114	0.527863		5.75247	0.084244	0.168104
5.75317	8.35942	0.70209	0.073009		5.75036	0.527596	0.527756		5.75317	0.084368	0.168123
5.75387	8.36256	0.70161	0.073116		5.75106	0.527237	0.527802		5.75387	0.084244	0.167809
5.75457	8.36519	0.701389	0.073215		5.75177	0.527435	0.528214		5.75457	0.084196	0.167366
5.75527	8.3682	0.701278	0.072932		5.75247	0.527519	0.528221		5.75527	0.084549	0.167419
5.75597	8.37116	0.701339	0.073055		5.75317	0.526848	0.528336		5.75597	0.084747	0.166781
5.75668	8.37425	0.701438	0.073329		5.75387	0.526855	0.528244		5.75668	0.085062	0.165823
5.75738	8.37678	0.701568	0.073734		5.75457	0.526825	0.528008		5.75738	0.084671	0.165326
5.75808	8.37936	0.701244	0.074031		5.75527	0.526344	0.528419		5.75808	0.084873	0.164581
5.75878	8.38228	0.701167	0.074779		5.75597	0.526207	0.528229		5.75878	0.084976	0.163914
5.75948	8.38472	0.70111	0.075473		5.75668	0.526245	0.527916		5.75948	0.08498	0.163321
5.76018	8.388	0.701377	0.075847		5.75738	0.526695	0.527573		5.76018	0.08539	0.162943
5.76088	8.39102	0.701575	0.076335		5.75808	0.526642	0.527451		5.76088	0.085613	0.163323
5.76159	8.39374	0.701274	0.07664		5.75878	0.526535	0.527069		5.76159	0.085802	0.163864
5.76229	8.39705	0.701186	0.076511		5.75948	0.526596	0.526237		5.76229	0.086277	0.16387
5.76299	8.39976	0.701076	0.076617		5.76018	0.526726	0.525406		5.76299	0.086595	0.163266
5.76369	8.40278	0.700599	0.077251		5.76088	0.526665	0.524956		5.76369	0.086773	0.163073
5.76439	8.40559	0.700217	0.077907		5.76159	0.526947	0.525032		5.76439	0.086777	0.163166
5.76509	8.40768	0.700301	0.078204		5.76229	0.527328	0.525658		5.76509	0.087023	0.162974
5.76579	8.4103	0.700202	0.07822		5.76299	0.527908	0.525925		5.76579	0.087204	0.16302
5.76649	8.41315	0.700298	0.078349		5.76369	0.527664	0.525764		5.76649	0.087248	0.162889
5.7672	8.41579	0.700118	0.078517		5.76439	0.527458	0.526375		5.7672	0.08728	0.162632
5.7679	8.41887	0.700465	0.078357		5.76509	0.527863	0.526413		5.7679	0.08744	0.162398
5.7686	8.42172	0.700774	0.078258		5.76579	0.527756	0.526733		5.7686	0.087278	0.161774
5.7693	8.42386	0.701076	0.078098		5.76649	0.527802	0.526962		5.7693	0.087484	0.161258
5.77	8.42632	0.700957	0.078029		5.7672	0.528214	0.526436		5.77	0.088095	0.161228
5.7707	8.42841	0.70124	0.077777		5.7679	0.528221	0.526405		5.7707	0.088463	0.161418
5.7714	8.43073	0.700736	0.077724		5.7686	0.528336	0.526093		5.7714	0.088537	0.161448
5.77211	8.43312	0.700576	0.077319		5.7693	0.528244	0.5261		5.77211	0.088669	0.161685
5.77281	8.43601	0.700648	0.077747		5.77	0.528008	0.526154		5.77281	0.088579	0.162146
5.77351	8.439	0.700618	0.077556		5.7707	0.528419	0.526276		5.77351	0.088398	0.162004
5.77421	8.44152	0.700565	0.077716		5.7714	0.528229	0.526497		5.77421	0.088516	0.161863
5.77491	8.44404	0.700774	0.077655		5.77211	0.527916	0.526344		5.77491	0.088034	0.162017
5.77561	8.44664	0.701244	0.078227		5.77281	0.527573	0.526642		5.77561	0.087456	0.162209
5.77631	8.44939	0.701328	0.078738		5.77351	0.527451	0.526756		5.77631	0.087862	0.162145
5.77702	8.45213	0.702094	0.078822		5.77421	0.527069	0.52636		5.77702	0.087593	0.161868
5.77772	8.45467	0.70227	0.078654		5.77491	0.526237	0.525726		5.77772	0.087128	0.161985
5.77842	8.45715	0.702445	0.07851		5.77561	0.525406	0.525269		5.77842	0.087429	0.162515
5.77912	8.45947	0.702792	0.078342		5.77631	0.524956	0.524597		5.77912	0.087559	0.162866
5.77982	8.46187	0.702632	0.078044		5.77702	0.525032	0.524155		5.77982	0.087551	0.162894
5.78052	8.46483	0.703319	0.07851		5.77772	0.525658	0.524094		5.78052	0.087919	0.163105
5.78122	8.46754	0.703597	0.078937		5.77842	0.525925	0.524155		5.78122	0.088087	0.163383
5.78193	8.47042	0.70388	0.079181		5.77912	0.525764	0.524124		5.78193	0.088455	0.163532
5.78263	8.47334	0.704234	0.079013		5.77982	0.526375	0.523376		5.78263	0.088413	0.163451
5.78333	8.47592	0.704963	0.078822		5.78052	0.526413	0.523216		5.78333	0.088415	0.163577
5.78403	8.47857	0.705814	0.078571		5.78122	0.526733	0.522606		5.78403	0.088545	0.163969
5.78473	8.48154	0.705833	0.078342		5.78193	0.526962	0.522026		5.78473	0.088629	0.164199
5.78543	8.48443	0.704898	0.078387		5.78263	0.526436	0.521103		5.78543	0.08872	0.163961
5.78613	8.48723	0.705527	0.077991		5.78333	0.526405	0.520782		5.78613	0.088396	0.164083
5.78683	8.49021	0.705646	0.077411		5.78403	0.526093	0.520775		5.78683	0.088302	0.163733
5.78754	8.49323	0.705203	0.076656		5.78473	0.5261	0.520615		5.78754	0.087978	0.163805
5.78824	8.49586	0.705409	0.076282		5.78543	0.526154	0.520676		5.78824	0.087637	0.164605
5.78894	8.49832	0.705905	0.076091		5.78613	0.526276	0.521149		5.78894	0.08752	0.165106
5.78964	8.50105	0.706416	0.07603		5.78683	0.526497	0.521126		5.78964	0.087478	0.165429
5.79034	8.50414	0.706496	0.07545		5.78754	0.526344	0.521095		5.79034	0.087612	0.165413
5.79104	8.50739	0.706634	0.075122		5.78824	0.526642	0.520393		5.79104	0.087532	0.165641
5.79174	8.51025	0.706748	0.074939		5.78894	0.526756	0.520508		5.79174	0.086986	0.165967
5.79245	8.51308	0.706569	0.074985		5.78964	0.52636	0.520836		5.79245	0.087576	0.165734
5.79315	8.51586	0.706657	0.075061		5.79034	0.525726	0.521385		5.79315	0.08802	0.165963
5.79385	8.51841	0.70687	0.075008		5.79104	0.525269	0.521332		5.79385	0.08758	0.166465
5.79455	8.52087	0.707153	0.074855		5.79174	0.524597	0.522057		5.79455	0.087284	0.16711
5.79525	8.52306	0.707351	0.074466		5.79245	0.524155	0.521996		5.79525	0.087332	0.16748
5.79595	8.52532	0.707278	0.074046		5.79315	0.524094	0.522064		5.79595	0.087393	0.167003
5.79665	8.52806	0.707164	0.073848		5.79385	0.524155	0.522461		5.79665	0.08724	0.166695
5.79736	8.5307	0.707767	0.073985		5.79455	0.524124	0.52243		5.79736	0.086521	0.166531
5.79806	8.53334	0.707626	0.074123		5.79525	0.523376	0.523407		5.79806	0.086513	0.16701
5.79876	8.5356	0.707908	0.074596		5.79595	0.523216	0.52375		5.79876	0.08655	0.167716
5.79946	8.53809	0.708396	0.074779		5.79665	0.522606	0.523766		5.79946	0.086487	0.167826
5.80016	8.54104	0.708293	0.074504		5.79736	0.522026	0.523659		5.80016	0.08625	0.167686
5.80086	8.54381	0.708297	0.074954		5.79806	0.521103	0.523331		5.80086	0.08592	0.167548
5.80156	8.54636	0.708266	0.075214		5.79876	0.520782	0.523972		5.80156	0.085529	0.167769
5.80227	8.54907	0.708247	0.07529		5.79946	0.520775	0.523232		5.80227	0.085535	0.168062
5.80297	8.55151	0.708541	0.075648		5.80016	0.520615	0.52327		5.80297	0.085335	0.167691
5.80367	8.55385	0.708842	0.075893		5.80086	0.520676	0.522865		5.80367	0.085249	0.167972
5.80437	8.55641	0.709167	0.076312		5.80156	0.521149	0.523354		5.80437	0.085056	0.16861
5.80507	8.55888	0.709449	0.076778		5.80227	0.521126	0.523926		5.80507	0.085207	0.168807
5.80577	8.56115	0.709407	0.076877		5.80297	0.521095	0.524071		5.80577	0.085579	0.168832
5.80647	8.56369	0.7098	0.076999		5.80367	0.520393	0.524139		5.80647	0.085508	0.168828
5.80717	8.56635	0.710006	0.076991		5.80437	0.520508	0.524391		5.80717	0.085569	0.169228
5.80788	8.56895	0.709811	0.076907		5.80507	0.520836	0.524673		5.80788	0.085617	0.169167
5.80858	8.57154	0.709811	0.07664		5.80577	0.521385	0.524902		5.80858	0.086147	0.169039
5.80928	8.57418	0.709766	0.076465		5.80647	0.521332	0.524994		5.80928	0.086063	0.169371
5.80998	8.57674	0.673343	0.07635		5.80717	0.522057	0.525192		5.80998	0.086481	0.168958
5.81068	8.57947	0.673495	0.076465		5.80788	0.521996	0.525482		5.81068	0.086735	0.168636
5.81138	8.58191	0.67369	0.076839		5.80858	0.522064	0.525688		5.81138	0.086601	0.168558
5.81208	8.58465	0.673663	0.0769		5.80928	0.522461	0.525986		5.81208	0.086416	0.169051
5.81279	8.58739	0.673286	0.077083		5.80998	0.52243	0.526787		5.81279	0.087423	0.168855
5.81349	8.58984	0.673465	0.077205		5.81068	0.523407	0.52739		5.81349	0.086584	0.168775
5.81419	8.5926	0.673217	0.077419		5.81138	0.52375	0.528511		5.81419	0.086382	0.169061
5.81489	8.59517	0.67316	0.07793		5.81208	0.523766	0.528587		5.81489	0.086323	0.169172
5.81559	8.59727	0.672828	0.078212		5.81279	0.523659	0.528076		5.81559	0.085871	0.168879
5.81629	8.59974	0.672649	0.078632		5.81349	0.523331	0.527672		5.81629	0.085453	0.168579
5.81699	8.60227	0.672961	0.078265		5.81419	0.523972	0.527634		5.81699	0.085018	0.168207
5.8177	8.60466	0.673145	0.077998		5.81489	0.523232	0.527779		5.8177	0.084682	0.168031
5.8184	8.6072	0.673034	0.077739		5.81559	0.52327	0.527855		5.8184	0.085022	0.167486
5.8191	8.60953	0.673103	0.077396		5.81629	0.522865	0.528282		5.8191	0.085293	0.16722
5.8198	8.61153	0.673366	0.077327		5.81699	0.523354	0.528648		5.8198	0.085201	0.167159
5.8205	8.61361	0.673225	0.077525		5.8177	0.523926	0.528694		5.8205	0.084833	0.167515
5.8212	8.61586	0.67411	0.077945		5.8184	0.524071	0.528824		5.8212	0.085064	0.167346
5.8219	8.61811	0.67419	0.077579		5.8191	0.524139	0.52906		5.8219	0.085192	0.167385
5.82261	8.62031	0.674346	0.077747		5.8198	0.524391	0.529305		5.82261	0.085674	0.167247
5.82331	8.62223	0.674049	0.077937		5.8205	0.524673	0.529121		5.82331	0.085752	0.166591
5.82401	8.62406	0.674167	0.077693		5.8212	0.524902	0.528709		5.82401	0.086031	0.166175
5.82471	8.62611	0.674239	0.077831		5.8219	0.524994	0.528168		5.82471	0.086454	0.16623
5.82541	8.62814	0.674262	0.078105		5.82261	0.525192	0.527939		5.82541	0.086161	0.165932
5.82611	8.62965	0.674636	0.078899		5.82331	0.525482	0.528389		5.82611	0.08568	0.165718
5.82681	8.63147	0.675357	0.078899		5.82401	0.525688	0.528397		5.82681	0.085893	0.165662
5.82752	8.63334	0.675925	0.078746		5.82471	0.525986	0.528259		5.82752	0.085932	0.166163
5.82822	8.63517	0.676078	0.078723		5.82541	0.526787	0.528244		5.82822	0.085903	0.166358
5.82892	8.63744	0.676196	0.079059		5.82611	0.52739	0.528099		5.82892	0.086191	0.166275
5.82962	8.63945	0.676242	0.079257		5.82681	0.528511	0.528069		5.82962	0.086305	0.16592
5.83032	8.64166	0.675861	0.079326		5.82752	0.528587	0.528076		5.83032	0.086408	0.165592
5.83102	8.64394	0.675552	0.079684		5.82822	0.528076	0.528008		5.83102	0.086599	0.165545
5.83172	8.64611	0.675189	0.080096		5.82892	0.527672	0.527649		5.83172	0.086904	0.165109
5.83242	8.64815	0.675227	0.08031		5.82962	0.527634	0.527763		5.83242	0.087526	0.164773
5.83313	8.6503	0.675605	0.080295		5.83032	0.527779	0.527473		5.83313	0.087507	0.164404
5.83383	8.65293	0.67546	0.080074		5.83102	0.527855	0.527504		5.83383	0.087355	0.164216
5.83453	8.6561	0.674792	0.08015		5.83172	0.528282	0.527611		5.83453	0.087692	0.163877
5.83523	8.65857	0.674358	0.080058		5.83242	0.528648	0.527901		5.83523	0.08789	0.16395
5.83593	8.66084	0.674155	0.079921		5.83313	0.528694	0.528503		5.83593	0.087997	0.163872
5.83663	8.66338	0.674247	0.079898		5.83383	0.528824	0.528099		5.83663	0.088041	0.163096
5.83733	8.66558	0.673789	0.079768		5.83453	0.52906	0.527847		5.83733	0.087877	0.162197
5.83804	8.6679	0.67393	0.079616		5.83523	0.529305	0.528091		5.83804	0.087799	0.162339
5.83874	8.67027	0.674281	0.07944		5.83593	0.529121	0.528305		5.83874	0.087837	0.162226
5.83944	8.67267	0.674438	0.079372		5.83663	0.528709	0.527802		5.83944	0.088066	0.161738
5.84014	8.67522	0.674525	0.079692		5.83733	0.528168	0.527679		5.84014	0.087829	0.161491
5.84084	8.67752	0.674533	0.079776		5.83804	0.527939	0.527534		5.84084	0.087471	0.161203
5.84154	8.67975	0.674369	0.079509		5.83874	0.528389	0.527664		5.84154	0.08765	0.160704
5.84224	8.68216	0.674812	0.079669		5.83944	0.528397	0.527977		5.84224	0.087839	0.160138
5.84295	8.68468	0.674583	0.079814		5.84014	0.528259	0.528069		5.84295	0.087448	0.15994
5.84365	8.68696	0.674751	0.079814		5.84084	0.528244	0.527733		5.84365	0.087068	0.160718
5.84435	8.68899	0.675029	0.079868		5.84154	0.528099	0.527527		5.84435	0.0874	0.160892
5.84505	8.69097	0.674808	0.079913		5.84224	0.528069	0.527527		5.84505	0.087299	0.161344
5.84575	8.69317	0.675025	0.080051		5.84295	0.528076	0.527031		5.84575	0.087208	0.161385
5.84645	8.69533	0.6753	0.080318		5.84365	0.528008	0.52681		5.84645	0.08662	0.161727
5.84715	8.69742	0.675166	0.080608		5.84435	0.527649	0.52713		5.84715	0.086841	0.161561
5.84786	8.69929	0.675449	0.080432		5.84505	0.527763	0.526848		5.84786	0.086653	0.161859
5.84856	8.70154	0.675582	0.080455		5.84575	0.527473	0.526672		5.84856	0.086622	0.161855
5.84926	8.70397	0.676151	0.080539		5.84645	0.527504	0.525993		5.84926	0.086298	0.161279
5.84996	8.70604	0.676315	0.080524		5.84715	0.527611	0.52623		5.84996	0.086349	0.161258
5.85066	8.70819	0.676715	0.080707		5.84786	0.527901	0.526413		5.85066	0.086342	0.160898
5.85136	8.71024	0.677421	0.080211		5.84856	0.528503	0.526512		5.85136	0.08691	0.160624
5.85206	8.71217	0.677566	0.080035		5.84926	0.528099	0.526314		5.85206	0.087261	0.160571
5.85276	8.7143	0.677436	0.079906		5.84996	0.527847	0.526375		5.85276	0.087643	0.160583
5.85347	8.71623	0.677478	0.08028		5.85066	0.528091	0.526306		5.85347	0.087877	0.160611
5.85417	8.71804	0.677425	0.080341		5.85136	0.528305	0.526268		5.85417	0.087972	0.16088
5.85487	8.71984	0.677581	0.08028		5.85206	0.527802	0.525909		5.85487	0.087938	0.160509
5.85557	8.72194	0.678226	0.081577		5.85276	0.527679	0.526848		5.85557	0.088428	0.160172
5.85627	8.72406	0.677352	0.081516		5.85347	0.527534	0.52739		5.85627	0.088945	0.16027
5.85697	8.72619	0.677085	0.081645		5.85417	0.527664	0.527298		5.85697	0.089113	0.160799
5.85767	8.72867	0.676963	0.081088		5.85487	0.527977	0.527237		5.85767	0.088663	0.160955
5.85838	8.73076	0.67757	0.081332		5.85557	0.528069	0.527695		5.85838	0.088491	0.160774
5.85908	8.73307	0.677268	0.081149		5.85627	0.527733	0.527939		5.85908	0.088352	0.160851
5.85978	8.73497	0.677947	0.081828		5.85697	0.527527	0.528389		5.85978	0.088075	0.160442
5.86048	8.73656	0.678268	0.082492		5.85767	0.527527	0.52877		5.86048	0.088613	0.160501
5.86118	8.73829	0.678352	0.083095		5.85838	0.527031	0.528702		5.86118	0.088667	0.160285
5.86188	8.74019	0.677932	0.083362		5.85908	0.52681	0.528549		5.86188	0.089203	0.160256
5.86258	8.74232	0.677989	0.083263		5.85978	0.52713	0.528435		5.86258	0.089031	0.160171
5.86329	8.74443	0.677825	0.08385		5.86048	0.526848	0.528137		5.86329	0.088543	0.159595
5.86399	8.74649	0.677608	0.084125		5.86118	0.526672	0.527718		5.86399	0.087953	0.159127
5.86469	8.74865	0.677848	0.084178		5.86188	0.525993	0.527573		5.86469	0.087683	0.159446
5.86539	8.75051	0.67839	0.08414		5.86258	0.52623	0.527557		5.86539	0.087309	0.159337
5.86609	8.75199	0.678863	0.084041		5.86329	0.526413	0.527412		5.86609	0.086855	0.15941
5.86679	8.75409	0.679446	0.084109		5.86399	0.526512	0.527344		5.86679	0.086426	0.159628
5.86749	8.75601	0.679885	0.084171		5.86469	0.526314	0.527237		5.86749	0.086239	0.160111
5.8682	8.75757	0.680267	0.084224		5.86539	0.526375	0.527344		5.8682	0.086325	0.160439
5.8689	8.75923	0.68093	0.084338		5.86609	0.526306	0.52729		5.8689	0.086441	0.160427
5.8696	8.76098	0.681514	0.084811		5.86679	0.526268	0.527107		5.8696	0.086347	0.160234
5.8703	8.76253	0.681571	0.085193		5.86749	0.525909	0.526901		5.8703	0.086128	0.160331
5.871	8.76406	0.681453	0.085307		5.8682	0.526848	0.526672		5.871	0.086428	0.160419
5.8717	8.76531	0.681323	0.085544		5.8689	0.52739	0.526688		5.8717	0.08736	0.161279
5.8724	8.76712	0.682018	0.086017		5.8696	0.527298	0.527023		5.8724	0.087992	0.162331
5.8731	8.7688	0.682048	0.086604		5.8703	0.527237	0.527168		5.8731	0.088236	0.162909
5.87381	8.77047	0.681773	0.08665		5.871	0.527695	0.527191		5.87381	0.088365	0.163382
5.87451	8.77198	0.682403	0.086757		5.8717	0.527939	0.527107		5.87451	0.087955	0.163886
5.87521	8.77323	0.68312	0.086719		5.8724	0.528389	0.527023		5.87521	0.0879	0.16407
5.87591	8.77499	0.683353	0.08623		5.8731	0.52877	0.526863		5.87591	0.087971	0.164019
5.87661	8.77665	0.683177	0.085719		5.87381	0.528702	0.526573		5.87661	0.087652	0.164744
5.87731	8.7781	0.682918	0.08562		5.87451	0.528549	0.526497		5.87731	0.087648	0.164943
5.87801	8.77947	0.68299	0.085155		5.87521	0.528435	0.52636		5.87801	0.088499	0.164958
5.87872	8.78086	0.683269	0.085239		5.87591	0.528137	0.526505		5.87872	0.088705	0.164665
5.87942	8.78271	0.683017	0.085483		5.87661	0.527718	0.526299		5.87942	0.088755	0.164186
5.88012	8.78447	0.683311	0.085872		5.87731	0.527573	0.525749		5.88012	0.088455	0.164111
5.88082	8.78579	0.682437	0.086414		5.87801	0.527557	0.525368		5.88082	0.089107	0.164367
5.88152	8.78722	0.682632	0.086551		5.87872	0.527412	0.525055		5.88152	0.089451	0.164107
5.88222	8.78899	0.683326	0.087054		5.87942	0.527344	0.524536		5.88222	0.089939	0.163795
5.88292	8.79104	0.683723	0.086703		5.88012	0.527237	0.524582		5.88292	0.090284	0.163222
5.88363	8.79277	0.683398	0.086597		5.88082	0.527344	0.524521		5.88363	0.090589	0.163129
5.88433	8.79447	0.683585	0.086292		5.88152	0.52729	0.524452		5.88433	0.091234	0.163453
5.88503	8.79583	0.683692	0.086116		5.88222	0.527107	0.524368		5.88503	0.091513	0.164221
5.88573	8.79746	0.683562	0.086429		5.88292	0.526901	0.524498		5.88573	0.091516	0.164819
5.88643	8.79958	0.683463	0.086635		5.88363	0.526672	0.524475		5.88643	0.091343	0.165417
5.88713	8.80147	0.68317	0.086993		5.88433	0.526688	0.524681		5.88713	0.091547	0.165454
5.88783	8.80326	0.683177	0.087413		5.88503	0.527023	0.52478		5.88783	0.091329	0.165998
5.88854	8.8051	0.683723	0.087207		5.88573	0.527168	0.524826		5.88854	0.091123	0.166574
5.88924	8.8072	0.684398	0.086833		5.88643	0.527191	0.524239		5.88924	0.091066	0.166505
5.88994	8.80948	0.684474	0.086887		5.88713	0.527107	0.524017		5.88994	0.091133	0.166828
5.89064	8.8114	0.684325	0.087207		5.88783	0.527023	0.523491		5.89064	0.090599	0.167085
5.89134	8.81305	0.68481	0.087108		5.88854	0.526863	0.523247		5.89134	0.090322	0.167222
5.89204	8.8147	0.685455	0.086749		5.88924	0.526573	0.52327		5.89204	0.090265	0.166921
5.89274	8.81609	0.685687	0.086749		5.88994	0.526497	0.523178		5.89274	0.090872	0.166461
5.89344	8.81726	0.685748	0.086642		5.89064	0.52636	0.522614		5.89344	0.091053	0.166873
5.89415	8.8189	0.685935	0.086719		5.89134	0.526505	0.522713		5.89415	0.090711	0.166874
5.89485	8.82055	0.686149	0.087199		5.89204	0.526299	0.522865		5.89485	0.090866	0.167178
5.89555	8.82238	0.68629	0.087276		5.89274	0.525749	0.523071		5.89555	0.090036	0.167485
5.89625	8.82431	0.686286	0.087047		5.89344	0.525368	0.523216		5.89625	0.090587	0.167324
5.89695	8.82652	0.68658	0.086345		5.89415	0.525055	0.523529		5.89695	0.090389	0.167297
5.89765	8.82838	0.686385	0.085857		5.89485	0.524536	0.523827		5.89765	0.090593	0.166711
5.89835	8.82983	0.686	0.086108		5.89555	0.524582	0.523659		5.89835	0.091003	0.166783
5.89905	8.83133	0.686622	0.085979		5.89625	0.524521	0.523895		5.89905	0.091436	0.167315
5.89976	8.83319	0.687064	0.085727		5.89695	0.524452	0.52388		5.89976	0.092022	0.167001
5.90046	8.83525	0.686954	0.086345		5.89765	0.524368	0.523872		5.90046	0.091686	0.167482
5.90116	8.83715	0.686977	0.086475		5.89835	0.524498	0.524002		5.90116	0.091511	0.167296
5.90186	8.83881	0.686874	0.086208		5.89905	0.524475	0.524368		5.90186	0.091343	0.167506
5.90256	8.84039	0.686599	0.086047		5.89976	0.524681	0.524651		5.90256	0.091013	0.167459
5.90326	8.84273	0.686553	0.086101		5.90046	0.52478	0.524452		5.90326	0.090982	0.167521
5.90397	8.84446	0.686168	0.085925		5.90116	0.524826	0.524147		5.90397	0.091156	0.167755
5.90467	8.8459	0.686305	0.085834		5.90186	0.524239	0.524055		5.90467	0.091289	0.167699
5.90537	8.84737	0.686153	0.085956		5.90256	0.524017	0.523941		5.90537	0.092136	0.167891
5.90607	8.84932	0.686195	0.085933		5.90326	0.523491	0.523666		5.90607	0.092104	0.168192
5.90677	8.85155	0.686416	0.086063		5.90397	0.523247	0.523567		5.90677	0.091478	0.168269
5.90747	8.85329	0.686462	0.085666		5.90467	0.52327	0.523514		5.90747	0.090994	0.167981
5.90817	8.85466	0.686469	0.085483		5.90537	0.523178	0.523392		5.90817	0.090853	0.16791
5.90888	8.85646	0.686828	0.085223		5.90607	0.522614	0.523384		5.90888	0.091045	0.167252
5.90958	8.85816	0.687133	0.084903		5.90677	0.522713	0.523567		5.90958	0.090917	0.167179
5.91028	8.85994	0.68674	0.084567		5.90747	0.522865	0.52375		5.91028	0.091251	0.16688
5.91098	8.8615	0.686496	0.084628		5.90817	0.523071	0.523888		5.91098	0.090957	0.167545
5.91168	8.863	0.686752	0.08504		5.90888	0.523216	0.524178		5.91168	0.091316	0.167203
5.91238	8.86468	0.687038	0.085368		5.90958	0.523529	0.524269		5.91238	0.090982	0.16806
5.91308	8.86639	0.686927	0.085635		5.91028	0.523827	0.524544		5.91308	0.090757	0.168468
5.91378	8.86825	0.687003	0.086047		5.91098	0.523659	0.524757		5.91378	0.090603	0.168255
5.91449	8.86979	0.686954	0.086063		5.91168	0.523895	0.524437		5.91449	0.090359	0.168098
5.91519	8.87155	0.687202	0.086078		5.91238	0.52388	0.524597		5.91519	0.091341	0.167923
5.91589	8.87343	0.687141	0.08591		5.91308	0.523872	0.525154		5.91589	0.09058	0.168014
5.91659	8.87505	0.687495	0.08559		5.91378	0.524002	0.525528		5.91659	0.090515	0.168182
5.91729	8.87669	0.687366	0.085368		5.91449	0.524368	0.525688		5.91729	0.090551	0.168138
5.91799	8.87828	0.686893	0.085132		5.91519	0.524651	0.525589		5.91799	0.090067	0.168614
5.91869	8.87993	0.686843	0.084956		5.91589	0.524452	0.525612		5.91869	0.090523	0.16882
5.91939	8.88146	0.687061	0.084972		5.91659	0.524147	0.525787		5.91939	0.090969	0.168744
5.9201	8.88337	0.686629	0.084949		5.91729	0.524055	0.525749		5.9201	0.090677	0.168527
5.9208	8.88537	0.686473	0.084811		5.91799	0.523941	0.52562		5.9208	0.090811	0.168124
5.9215	8.88678	0.686382	0.084651		5.91869	0.523666	0.525917		5.9215	0.090862	0.167445
5.9222	8.88862	0.686038	0.084171		5.91939	0.523567	0.526207		5.9222	0.090877	0.167923
5.9229	8.89005	0.68597	0.084171		5.9201	0.523514	0.52626		5.9229	0.091671	0.166797
5.9236	8.89142	0.685764	0.083652		5.9208	0.523392	0.52639		5.9236	0.091453	0.166599
5.92431	8.89254	0.685428	0.083286		5.9215	0.523384	0.526863		5.92431	0.091118	0.167196
5.92501	8.8936	0.685027	0.083537		5.9222	0.523567	0.527481		5.92501	0.091495	0.167432
5.92571	8.89527	0.684695	0.083896		5.9229	0.52375	0.527916		5.92571	0.091932	0.167552
5.92641	8.89712	0.684291	0.083736		5.9236	0.523888	0.528053		5.92641	0.091707	0.166946
5.92711	8.8987	0.684047	0.083331		5.92431	0.524178	0.528015		5.92711	0.0919	0.166587
5.92781	8.90027	0.683841	0.083469		5.92501	0.524269	0.528061		5.92781	0.091959	0.166912
5.92851	8.90209	0.684165	0.084254		5.92571	0.524544	0.52803		5.92851	0.091942	0.16699
5.92921	8.90385	0.68428	0.084239		5.92641	0.524757	0.528046		5.92921	0.091823	0.167434
5.92992	8.90537	0.684276	0.084689		5.92711	0.524437	0.52771		5.92992	0.09136	0.167792
5.93062	8.90698	0.684097	0.084644		5.92781	0.524597	0.527176		5.93062	0.091768	0.167356
5.93132	8.90812	0.683955	0.085155		5.92851	0.525154	0.527046		5.93132	0.091661	0.167911
5.93202	8.90948	0.683772	0.085208		5.92921	0.525528	0.52684		5.93202	0.091955	0.167763
5.93272	8.91097	0.683887	0.085475		5.92992	0.525688	0.526611		5.93272	0.092083	0.167512
5.93342	8.91268	0.684341	0.085796		5.93062	0.525589	0.526604		5.93342	0.091881	0.167789
5.93412	8.91429	0.684505	0.085849		5.93132	0.525612	0.526596		5.93412	0.092008	0.168134
5.93483	8.91586	0.684848	0.085719		5.93202	0.525787	0.526405		5.93483	0.092033	0.168503
5.93553	8.91726	0.685039	0.085757		5.93272	0.525749	0.526093		5.93553	0.092586	0.168489
5.93623	8.91887	0.685149	0.085712		5.93342	0.52562	0.525787		5.93623	0.092436	0.168117
5.93693	8.92056	0.685256	0.085437		5.93412	0.525917	0.525688		5.93693	0.092668	0.167945
5.93763	8.92219	0.685493	0.085468		5.93483	0.526207	0.525688		5.93763	0.093027	0.167974
5.93833	8.92347	0.685184	0.085597		5.93553	0.52626	0.525497		5.93833	0.092512	0.167979
5.93903	8.92483	0.685355	0.085277		5.93623	0.52639	0.525475		5.93903	0.092718	0.16728
5.93973	8.92616	0.684917	0.084895		5.93693	0.526863	0.525421		5.93973	0.092283	0.167786
5.94044	8.92794	0.68534	0.084743		5.93763	0.527481	0.525497		5.94044	0.092037	0.167369
5.94114	8.93003	0.685451	0.085033		5.93833	0.527916	0.525711		5.94114	0.091299	0.167385
5.94184	8.93134	0.685172	0.085017		5.93903	0.528053	0.525276		5.94184	0.091076	0.167437
5.94254	8.9325	0.685355	0.084567		5.93973	0.528015	0.52507		5.94254	0.09078	0.167586
5.94324	8.93408	0.685271	0.084781		5.94044	0.528061	0.525139		5.94324	0.09116	0.167295
5.94394	8.93566	0.685077	0.085262		5.94114	0.52803	0.524887		5.94394	0.091242	0.167241
5.94465	8.93714	0.684737	0.085475		5.94184	0.528046	0.524986		5.94465	0.091513	0.166498
5.94535	8.93874	0.684978	0.085658		5.94254	0.52771	0.525139		5.94535	0.091181	0.166699
5.94605	8.94067	0.685233	0.085849		5.94324	0.527176	0.524918		5.94605	0.091339	0.166304
5.94675	8.94255	0.685088	0.085979		5.94394	0.527046	0.524437		5.94675	0.091453	0.166187
5.94745	8.94416	0.685233	0.086093		5.94465	0.52684	0.524071		5.94745	0.091974	0.165684
5.94815	8.94565	0.685321	0.085811		5.94535	0.526611	0.523811		5.94815	0.091696	0.165776
5.94885	8.94696	0.685382	0.086047		5.94605	0.526604	0.523247		5.94885	0.091589	0.165592
5.94955	8.94827	0.685382	0.086307		5.94675	0.526596	0.52359		5.94955	0.091629	0.165515
5.95026	8.94984	0.684924	0.08662		5.94745	0.526405	0.523674		5.95026	0.091358	0.165445
5.95096	8.95146	0.685126	0.087238		5.94815	0.526093	0.523438		5.95096	0.091484	0.16519
5.95166	8.95322	0.684795	0.087459		5.94885	0.525787	0.523445		5.95166	0.091001	0.165558
5.95236	8.95468	0.684638	0.087703		5.94955	0.525688	0.52343		5.95236	0.090425	0.165635
5.95306	8.95597	0.684604	0.088123		5.95026	0.525688	0.523643		5.95306	0.090202	0.165933
5.95376	8.95729	0.684322	0.088298		5.95096	0.525497	0.523438		5.95376	0.08959	0.165851
5.95446	8.95868	0.68436	0.08842		5.95166	0.525475	0.523361		5.95446	0.08889	0.166131
5.95517	8.96024	0.684505	0.088481		5.95236	0.525421	0.523376		5.95517	0.088272	0.165496
5.95587	8.96182	0.684608	0.08903		5.95306	0.525497	0.523666		5.95587	0.088022	0.165287
5.95657	8.96337	0.685134	0.089526		5.95376	0.525711	0.523445		5.95657	0.087723	0.165579
5.95727	8.96485	0.685508	0.0899		5.95446	0.525276	0.522942		5.95727	0.08733	0.165159
5.95797	8.96591	0.685931	0.090053		5.95517	0.52507	0.52301		5.95797	0.087005	0.166041
5.95867	8.96708	0.685771	0.090175		5.95587	0.525139	0.523026		5.95867	0.086677	0.165897
5.95937	8.96849	0.686259	0.090282		5.95657	0.524887	0.522614		5.95937	0.086851	0.165304
5.96007	8.97025	0.686511	0.090823		5.95727	0.524986	0.522499		5.96007	0.086395	0.165078
5.96078	8.97161	0.686904	0.091388		5.95797	0.525139	0.522461		5.96078	0.086136	0.164943
5.96148	8.97322	0.68719	0.091869		5.95867	0.524918	0.522209		5.96148	0.086244	0.165131
5.96218	8.97473	0.687286	0.091792		5.95937	0.524437	0.521919		5.96218	0.085571	0.165306
5.96288	8.9761	0.687316	0.092136		5.96007	0.524071	0.522072		5.96288	0.085071	0.165362
5.96358	8.97752	0.686748	0.092303		5.96078	0.523811	0.522331		5.96358	0.084946	0.16549
5.96428	8.97885	0.686446	0.092204		5.96148	0.523247	0.522476		5.96428	0.085331	0.165103
5.96499	8.98004	0.686435	0.091846		5.96218	0.52359	0.522263		5.96499	0.085981	0.164675
5.96569	8.98114	0.686462	0.092303		5.96288	0.523674	0.522377		5.96569	0.085983	0.1651
5.96639	8.98236	0.686439	0.092181		5.96358	0.523438	0.522339		5.96639	0.08572	0.164855
5.96709	8.98402	0.686778	0.091937		5.96428	0.523445	0.522133		5.96709	0.08547	0.165214
5.96779	8.98517	0.686748	0.090976		5.96499	0.52343	0.522148		5.96779	0.08544	0.165905
5.96849	8.9861	0.686897	0.090991		5.96569	0.523643	0.522301		5.96849	0.084894	0.166092
5.96919	8.9871	0.686496	0.091106		5.96639	0.523438	0.522911		5.96919	0.085169	0.165828
5.96989	8.98836	0.685943	0.091212		5.96709	0.523361	0.523132		5.96989	0.084795	0.165692
5.9706	8.98954	0.685279	0.091106		5.96779	0.523376	0.523224		5.9706	0.084806	0.165487
5.9713	8.9907	0.685291	0.09064		5.96849	0.523666	0.523399		5.9713	0.084753	0.166649
5.972	8.99178	0.685107	0.090556		5.96919	0.523445	0.523102		5.972	0.085031	0.167041
5.9727	8.9931	0.685031	0.090549		5.96989	0.522942	0.523048		5.9727	0.085119	0.166611
5.9734	8.99432	0.685432	0.090404		5.9706	0.52301	0.523369		5.9734	0.08622	0.166902
5.9741	8.99539	0.685535	0.090656		5.9713	0.523026	0.523682		5.9741	0.086323	0.166739
5.9748	8.99704	0.685409	0.090877		5.972	0.522614	0.523636		5.9748	0.086374	0.166877
5.97551	8.9981	0.685001	0.091228		5.9727	0.522499	0.523834		5.97551	0.086061	0.167147
5.97621	8.9985	0.685115	0.091594		5.9734	0.522461	0.52375		5.97621	0.086696	0.166693
5.97691	8.99958	0.685352	0.091487		5.9741	0.522209	0.524033		5.97691	0.086679	0.166064
5.97761	9.00097	0.685466	0.090976		5.9748	0.521919	0.5243		5.97761	0.086817	0.165739
5.97831	9.00226	0.685676	0.09064		5.97551	0.522072	0.523979		5.97831	0.086889	0.165948
5.97901	9.0037	0.68605	0.090442		5.97621	0.522331	0.523972		5.97901	0.086279	0.166047
5.97971	9.00493	0.686019	0.090251		5.97691	0.522476	0.523994		5.97971	0.085932	0.166249
5.98041	9.00629	0.685931	0.09019		5.97761	0.522263	0.523674		5.98041	0.085798	0.166031
5.98112	9.00717	0.685615	0.090076		5.97831	0.522377	0.523911		5.98112	0.085789	0.165995
5.98182	9.00798	0.685573	0.089999		5.97901	0.522339	0.524559		5.98182	0.085724	0.165592
5.98252	9.00893	0.685817	0.089931		5.97971	0.522133	0.524834		5.98252	0.085787	0.165474
5.98322	9.01004	0.686355	0.090297		5.98041	0.522148	0.525238		5.98322	0.086471	0.16505
5.98392	9.01135	0.686893	0.089809		5.98112	0.522301	0.525719		5.98392	0.087015	0.165334
5.98462	9.01267	0.687144	0.090442		5.98182	0.522911	0.52581		5.98462	0.086758	0.165948
5.98532	9.01369	0.687263	0.090244		5.98252	0.523132	0.525986		5.98532	0.086777	0.16594
5.98603	9.01505	0.687606	0.090236		5.98322	0.523224	0.526077		5.98603	0.086521	0.166457
5.98673	9.01651	0.68814	0.089435		5.98392	0.523399	0.526207		5.98673	0.086729	0.166774
5.98743	9.01839	0.688491	0.089206		5.98462	0.523102	0.526009		5.98743	0.086668	0.166847
5.98813	9.02007	0.688506	0.089336		5.98532	0.523048	0.525795		5.98813	0.086862	0.166393
5.98883	9.02068	0.688613	0.088794		5.98603	0.523369	0.525833		5.98883	0.087286	0.166235
5.98953	9.02195	0.688712	0.089404		5.98673	0.523682	0.525749		5.98953	0.087292	0.166136
5.99023	9.02305	0.688583	0.089931		5.98743	0.523636	0.525635		5.99023	0.088034	0.166367
5.99094	9.02382	0.688899	0.090053		5.98813	0.523834	0.525421		5.99094	0.08828	0.1665
5.99164	9.0245	0.689006	0.090396		5.98883	0.52375	0.525803		5.99164	0.088138	0.166723
5.99234	9.02533	0.688537	0.090335		5.98953	0.524033	0.526245		5.99234	0.087835	0.166549
5.99304	9.02644	0.688411	0.090602		5.99023	0.5243	0.526474		5.99304	0.087766	0.166148
5.99374	9.02808	0.6884	0.090594		5.99094	0.523979	0.526222		5.99374	0.088224	0.16654
5.99444	9.02942	0.688544	0.091052		5.99164	0.523972	0.526688		5.99444	0.088201	0.167056
5.99514	9.03018	0.688354	0.091258		5.99234	0.523994	0.52639		5.99514	0.088419	0.167383
5.99585	9.03141	0.688331	0.090862		5.99304	0.523674	0.526192		5.99585	0.089083	0.16769
5.99655	9.03209	0.688483	0.090808		5.99374	0.523911	0.526138		5.99655	0.089342	0.167837
5.99725	9.03273	0.688289	0.090953		5.99444	0.524559	0.526459		5.99725	0.089777	0.167843
5.99795	9.03394	0.688098	0.090869		5.99514	0.524834	0.526222		5.99795	0.08976	0.16811
5.99865	9.03482	0.688743	0.090572		5.99585	0.525238	0.526146		5.99865	0.089512	0.168353
5.99935	9.0365	0.689113	0.090373		5.99655	0.525719	0.52623		5.99935	0.088964	0.168481
6.00005	9.03809	0.689017	0.090373		5.99725	0.52581	0.526428		6.00005	0.103021	0.168427
6.00075	9.03949	0.688899	0.09035		5.99795	0.525986	0.526855		6.00075	0.103571	0.168144
6.00146	9.04097	0.688892	0.090274		5.99865	0.526077	0.526588		6.00146	0.103746	0.168019
6.00216	9.04223	0.688869	0.090068		5.99935	0.526207	0.526672		6.00216	0.104114	0.16783
6.00286	9.04345	0.688731	0.090228		6.00005	0.526009	0.526711		6.00286	0.10417	0.167685
6.00356	9.0449	0.688911	0.090495		6.00075	0.525795	0.526657		6.00356	0.104065	0.167402
6.00426	9.04657	0.688968	0.091006		6.00146	0.525833	0.526054		6.00426	0.10409	0.166991
6.00496	9.04799	0.688998	0.09064		6.00216	0.525749	0.525978		6.00496	0.104463	0.167007
6.00566	9.04911	0.689124	0.090709		6.00286	0.525635	0.526321		6.00566	0.10465	0.167161
6.00637	9.05055	0.689635	0.090388		6.00356	0.525421	0.52639		6.00637	0.10473	0.166839
6.00707	9.05175	0.689895	0.090518		6.00426	0.525803	0.526695		6.00707	0.105038	0.166648
6.00777	9.05303	0.690059	0.091098		6.00496	0.526245	0.526711		6.00777	0.104471	0.167014
6.00847	9.05455	0.69012	0.091251		6.00566	0.526474	0.526787		6.00847	0.104116	0.166484
6.00917	9.05598	0.689788	0.091518		6.00637	0.526222	0.526596		6.00917	0.104509	0.166603
6.00987	9.05699	0.689582	0.091235		6.00707	0.526688	0.52684		6.00987	0.104585	0.166553
6.01057	9.05813	0.689819	0.090572		6.00777	0.52639	0.526947		6.01057	0.104498	0.166682
6.01128	9.05945	0.690185	0.09077		6.00847	0.526192	0.527023		6.01128	0.104059	0.16697
6.01198	9.06062	0.690612	0.090793		6.00917	0.526138	0.527557		6.01198	0.103765	0.167116
6.01268	9.06226	0.690948	0.09093		6.00987	0.526459	0.52771		6.01268	0.1038	0.167209
6.01338	9.06372	0.690997	0.09109		6.01057	0.526222	0.527718		6.01338	0.103325	0.16706
6.01408	9.0648	0.690902	0.09193		6.01128	0.526146	0.527351		6.01408	0.102836	0.167148
6.01478	9.06625	0.691032	0.092426		6.01198	0.52623	0.526794		6.01478	0.102756	0.167241
6.01548	9.06718	0.691386	0.092136		6.01268	0.526428	0.526329		6.01548	0.102554	0.167442
6.01619	9.06825	0.69131	0.091441		6.01338	0.526855	0.52626		6.01619	0.102373	0.16767
6.01689	9.07	0.691505	0.091243		6.01408	0.526588	0.526009		6.01689	0.102653	0.168095
6.01759	9.07152	0.691356	0.091266		6.01478	0.526672	0.526146		6.01759	0.10298	0.168029
6.01829	9.07309	0.691089	0.091113		6.01548	0.526711	0.525673		6.01829	0.103056	0.167987
6.01899	9.07415	0.690887	0.090984		6.01619	0.526657	0.524834		6.01899	0.102468	0.168154
6.01969	9.07527	0.691001	0.091251		6.01689	0.526054	0.524307		6.01969	0.101683	0.167918
6.02039	9.07634	0.691009	0.091289		6.01759	0.525978	0.524429		6.02039	0.101557	0.16785
6.02109	9.07755	0.690421	0.090961		6.01829	0.526321	0.524628		6.02109	0.101587	0.167696
6.0218	9.07822	0.689941	0.090694		6.01899	0.52639	0.524582		6.0218	0.101423	0.167182
6.0225	9.0791	0.68999	0.0909		6.01969	0.526695	0.525192		6.0225	0.101272	0.167311
6.0232	9.08022	0.690154	0.090869		6.02039	0.526711	0.525864		6.0232	0.101269	0.167731
6.0239	9.08174	0.690704	0.090884		6.02109	0.526787	0.525932		6.0239	0.100906	0.167909
6.0246	9.08264	0.690871	0.091113		6.0218	0.526596	0.526192		6.0246	0.100471	0.168109
6.0253	9.08422	0.691009	0.090823		6.0225	0.52684	0.525986		6.0253	0.100212	0.16779
6.026	9.08564	0.690768	0.090305		6.0232	0.526947	0.525879		6.026	0.100571	0.167825
6.02671	9.08692	0.690517	0.090274		6.0239	0.527023	0.525818		6.02671	0.100685	0.167628
6.02741	9.08794	0.690765	0.090106		6.0246	0.527557	0.525726		6.02741	0.100849	0.167833
6.02811	9.089	0.69118	0.089565		6.0253	0.52771	0.525505		6.02811	0.101158	0.168398
6.02881	9.08991	0.691436	0.089397		6.026	0.527718	0.525459		6.02881	0.101093	0.168288
6.02951	9.09086	0.691085	0.088924		6.02671	0.527351	0.525024		6.02951	0.101095	0.168132
6.03021	9.09231	0.690803	0.089046		6.02741	0.526794	0.525421		6.03021	0.101171	0.168148
6.03091	9.09352	0.691119	0.088779		6.02811	0.526329	0.525795		6.03091	0.101028	0.16818
6.03162	9.09536	0.690982	0.088573		6.02881	0.52626	0.52562		6.03162	0.100668	0.168388
6.03232	9.09657	0.6911	0.088756		6.02951	0.526009	0.525253		6.03232	0.100885	0.168259
6.03302	9.09801	0.691783	0.088832		6.03021	0.526146	0.525085		6.03302	0.100946	0.167659
6.03372	9.0996	0.691173	0.088664		6.03091	0.525673	0.525108		6.03372	0.100612	0.167188
6.03442	9.10056	0.690658	0.088634		6.03162	0.524834	0.524986		6.03442	0.100283	0.167138
6.03512	9.10103	0.690685	0.089069		6.03232	0.524307	0.524963		6.03512	0.100225	0.167552
6.03582	9.10176	0.690673	0.089061		6.03302	0.524429	0.524963		6.03582	0.100225	0.167703
6.03653	9.10253	0.690997	0.089214		6.03372	0.524628	0.525185		6.03653	0.100029	0.167775
6.03723	9.1036	0.691421	0.089305		6.03442	0.524582	0.525215		6.03723	0.099415	0.167578
6.03793	9.10468	0.69157	0.089275		6.03512	0.525192	0.525597		6.03793	0.099113	0.167098
6.03863	9.1059	0.691306	0.089435		6.03582	0.525864	0.525818		6.03863	0.099069	0.166918
6.03933	9.10716	0.691489	0.089725		6.03653	0.525932	0.526009		6.03933	0.099188	0.166907
6.04003	9.10804	0.691833	0.090083		6.03723	0.526192	0.525963		6.04003	0.098999	0.166783
6.04073	9.10886	0.691802	0.090388		6.03793	0.525986	0.525787		6.04073	0.098537	0.166871
6.04143	9.10993	0.691756	0.090656		6.03863	0.525879	0.525436		6.04143	0.098194	0.166845
6.04214	9.11098	0.691188	0.090396		6.03933	0.525818	0.52549		6.04214	0.098343	0.166668
6.04284	9.11225	0.69136	0.090526		6.04003	0.525726	0.525482		6.04284	0.098989	0.166551
6.04354	9.1133	0.691268	0.090572		6.04073	0.525505	0.524895		6.04354	0.099403	0.166784
6.04424	9.11407	0.691295	0.090167		6.04143	0.525459	0.524437		6.04424	0.099653	0.167334
6.04494	9.11518	0.691543	0.089946		6.04214	0.525024	0.524506		6.04494	0.099779	0.167417
6.04564	9.11618	0.691894	0.089893		6.04284	0.525421	0.523682		6.04564	0.09931	0.166984
6.04634	9.11721	0.691337	0.090686		6.04354	0.525795	0.523605		6.04634	0.099068	0.166723
6.04705	9.11827	0.69144	0.091426		6.04424	0.52562	0.523109		6.04705	0.09905	0.16652
6.04775	9.11927	0.691074	0.091769		6.04494	0.525253	0.522896		6.04775	0.098858	0.166205
6.04845	9.11979	0.690719	0.091937		6.04564	0.525085	0.523323		6.04845	0.098705	0.16613
6.04915	9.12045	0.690902	0.091563		6.04634	0.525108	0.524178		6.04915	0.098633	0.166083
6.04985	9.12189	0.690211	0.091251		6.04705	0.524986	0.524773		6.04985	0.098951	0.166441
6.05055	9.12333	0.689552	0.091205		6.04775	0.524963	0.525833		6.05055	0.099377	0.166688
6.05125	9.12455	0.689571	0.090709		6.04845	0.524963	0.525864		6.05125	0.09948	0.166327
6.05196	9.12587	0.689887	0.090579		6.04915	0.525185	0.525826		6.05196	0.099331	0.166235
6.05266	9.12683	0.690154	0.091144		6.04985	0.525215	0.525658		6.05266	0.098963	0.166322
6.05336	9.1278	0.690322	0.091571		6.05055	0.525597	0.526451		6.05336	0.098701	0.166281
6.05406	9.12887	0.690791	0.091563		6.05125	0.525818	0.527298		6.05406	0.098612	0.166252
6.05476	9.13003	0.690627	0.091853		6.05196	0.526009	0.527992		6.05476	0.098692	0.165916
6.05546	9.13035	0.690295	0.092059		6.05266	0.525963	0.528549		6.05546	0.098663	0.165626
6.05616	9.13079	0.691211	0.091579		6.05336	0.525787	0.528236		6.05616	0.098493	0.164945
6.05687	9.132	0.691486	0.091045		6.05406	0.525436	0.527893		6.05687	0.098545	0.164297
6.05757	9.13243	0.691337	0.091273		6.05476	0.52549	0.527824		6.05757	0.098854	0.163931
6.05827	9.13332	0.691478	0.091724		6.05546	0.525482	0.527351		6.05827	0.099212	0.163478
6.05897	9.13393	0.690692	0.092029		6.05616	0.524895	0.527969		6.05897	0.099851	0.163049
6.05967	9.13497	0.690536	0.092334		6.05687	0.524437	0.528191		6.05967	0.100187	0.16279
6.06037	9.13617	0.690433	0.092181		6.05757	0.524506	0.528313		6.06037	0.100059	0.162831
6.06107	9.13691	0.690658	0.09196		6.05827	0.523682	0.528648		6.06107	0.099979	0.162565
6.06177	9.13787	0.690391	0.091983		6.05897	0.523605	0.528572		6.06177	0.100149	0.162362
6.06248	9.13936	0.690372	0.091602		6.05967	0.523109	0.528572		6.06248	0.100401	0.16226
6.06318	9.14095	0.690021	0.091212		6.06037	0.522896	0.528442		6.06318	0.100616	0.161703
6.06388	9.14182	0.689605	0.09109		6.06107	0.523323	0.528511		6.06388	0.101133	0.161656
6.06458	9.14316	0.689567	0.091075		6.06177	0.524178	0.528992		6.06458	0.100942	0.161412
6.06528	9.14429	0.690273	0.091273		6.06248	0.524773	0.528992		6.06528	0.100622	0.16126
6.06598	9.14436	0.690021	0.091655		6.06318	0.525833	0.528999		6.06598	0.100384	0.161078
6.06668	9.14541	0.69033	0.091739		6.06388	0.525864	0.529144		6.06668	0.100294	0.160784
6.06739	9.14573	0.690429	0.09196		6.06458	0.525826	0.529686		6.06739	0.10018	0.160925
6.06809	9.14667	0.690295	0.092525		6.06528	0.525658	0.529915		6.06809	0.10046	0.161595
6.06879	9.14706	0.690826	0.092853		6.06598	0.526451	0.529716		6.06879	0.101139	0.161689
6.06949	9.14754	0.691295	0.092029		6.06668	0.527298	0.529541		6.06949	0.101301	0.161407
6.07019	9.1484	0.691749	0.091907		6.06739	0.527992	0.529305		6.07019	0.101002	0.161117
6.07089	9.14975	0.69194	0.091685		6.06809	0.528549	0.529007		6.07089	0.100767	0.161075
6.07159	9.15062	0.691337	0.091167		6.06879	0.528236	0.529144		6.07159	0.100885	0.161033
6.0723	9.15173	0.691367	0.091487		6.06949	0.527893	0.529327		6.0723	0.101389	0.161427
6.073	9.15252	0.691558	0.0918		6.07019	0.527824	0.529015		6.073	0.101885	0.162122
6.0737	9.15327	0.692054	0.091983		6.07089	0.527351	0.528969		6.0737	0.102085	0.162564
6.0744	9.15382	0.69184	0.092273		6.07159	0.527969	0.528938		6.0744	0.101921	0.162892
6.0751	9.15505	0.691425	0.092326		6.0723	0.528191	0.529427		6.0751	0.101608	0.162993
6.0758	9.15662	0.69165	0.09225		6.073	0.528313	0.529579		6.0758	0.101845	0.162822
6.0765	9.15759	0.691844	0.091205		6.0737	0.528648	0.529602		6.0765	0.102222	0.162638
6.07721	9.15825	0.692168	0.090839		6.0744	0.528572	0.529961		6.07721	0.102087	0.162608
6.07791	9.15873	0.691997	0.091205		6.0751	0.528572	0.529915		6.07791	0.101909	0.162533
6.07861	9.15943	0.692161	0.091624		6.0758	0.528442	0.530113		6.07861	0.101862	0.162273
6.07931	9.16017	0.69202	0.091182		6.0765	0.528511	0.530693		6.07931	0.10177	0.161754
6.08001	9.16084	0.691611	0.091365		6.07721	0.528992	0.530983		6.08001	0.102087	0.161336
6.08071	9.16183	0.691879	0.091861		6.07791	0.528992	0.531334		6.08071	0.102709	0.161257
6.08141	9.16266	0.692481	0.091968		6.07861	0.528999	0.531715		6.08141	0.103269	0.161168
6.08211	9.16406	0.692435	0.091823		6.07931	0.529144	0.531395		6.08211	0.103948	0.161101
6.08282	9.16485	0.692142	0.091495		6.08001	0.529686	0.531807		6.08282	0.104507	0.161313
6.08352	9.16627	0.69218	0.091045		6.08071	0.529915	0.53154		6.08352	0.105047	0.161361
6.08422	9.16762	0.692409	0.090671		6.08141	0.529716	0.531418		6.08422	0.105375	0.161312
6.08492	9.16828	0.692523	0.09035		6.08211	0.529541	0.531662		6.08492	0.105539	0.161147
6.08562	9.16829	0.692699	0.090778		6.08282	0.529305	0.53138		6.08562	0.105364	0.160855
6.08632	9.1688	0.693023	0.091045		6.08352	0.529007	0.532097		6.08632	0.105236	0.160991
6.08702	9.16957	0.692706	0.090793		6.08422	0.529144	0.532188		6.08702	0.105495	0.160839
6.08773	9.17036	0.692104	0.091228		6.08492	0.529327	0.531593		6.08773	0.105493	0.160542
6.08843	9.1716	0.691711	0.091396		6.08562	0.529015	0.531601		6.08843	0.105621	0.1604
6.08913	9.17231	0.691337	0.091029		6.08632	0.528969	0.531303		6.08913	0.105745	0.160268
6.08983	9.17289	0.690986	0.090984		6.08702	0.528938	0.531082		6.08983	0.105751	0.16065
6.09053	9.17406	0.690971	0.091006		6.08773	0.529427	0.530678		6.09053	0.105762	0.161158
6.09123	9.17507	0.690891	0.090923		6.08843	0.529579	0.531265		6.09123	0.105976	0.161542
6.09193	9.17595	0.690257	0.091159		6.08913	0.529602	0.53183		6.09193	0.106241	0.161847
6.09264	9.17684	0.689918	0.092128		6.08983	0.529961	0.531761		6.09264	0.10615	0.161657
6.09334	9.17792	0.689689	0.091884		6.09053	0.529915	0.53215		6.09334	0.106054	0.161494
6.09404	9.1789	0.689502	0.091228		6.09123	0.530113	0.531319		6.09404	0.105554	0.161854
6.09474	9.18012	0.689487	0.091319		6.09193	0.530693	0.530945		6.09474	0.104952	0.162146
6.09544	9.18112	0.689716	0.091327		6.09264	0.530983	0.530876		6.09544	0.104954	0.162565
6.09614	9.18176	0.689975	0.091182		6.09334	0.531334	0.531013		6.09614	0.104919	0.163185
6.09684	9.18208	0.689979	0.091617		6.09404	0.531715	0.531151		6.09684	0.104746	0.16364
6.09755	9.18214	0.690292	0.091792		6.09474	0.531395	0.531067		6.09755	0.104622	0.163735
6.09825	9.18262	0.690471	0.091792		6.09544	0.531807	0.531624		6.09825	0.104517	0.163806
6.09895	9.18333	0.690459	0.091937		6.09614	0.53154	0.531578		6.09895	0.104196	0.164021
6.09965	9.18377	0.69041	0.091846		6.09684	0.531418	0.53212		6.09965	0.104252	0.164209
6.10035	9.18453	0.6902	0.092288		6.09755	0.531662	0.532326		6.10035	0.104627	0.164136
6.10105	9.18562	0.689902	0.09196		6.09825	0.53138	0.531784		6.10105	0.104833	0.163898
6.10175	9.1865	0.689948	0.091907		6.09895	0.532097	0.532036		6.10175	0.105039	0.163887
6.10245	9.18765	0.6897	0.091617		6.09965	0.532188	0.53196		6.10245	0.105079	0.163997
6.10316	9.18831	0.689517	0.091083		6.10035	0.531593	0.532066		6.10316	0.105024	0.163913
6.10386	9.18936	0.689449	0.090663		6.10105	0.531601	0.531914		6.10386	0.104944	0.163971
6.10456	9.19034	0.689075	0.090297		6.10175	0.531303	0.53231		6.10456	0.105198	0.164322
6.10526	9.19081	0.688628	0.09035		6.10245	0.531082	0.532181		6.10526	0.105463	0.164435
6.10596	9.19141	0.688297	0.090724		6.10316	0.530678	0.532257		6.10596	0.105692	0.164408
6.10666	9.19244	0.687949	0.091151		6.10386	0.531265	0.532219		6.10666	0.105873	0.164629
6.10736	9.19342	0.687598	0.091785		6.10456	0.53183	0.531937		6.10736	0.106014	0.164564
6.10807	9.19395	0.687274	0.092471		6.10526	0.531761	0.531975		6.10807	0.105947	0.164171
6.10877	9.19469	0.686683	0.092723		6.10596	0.53215	0.532127		6.10877	0.105877	0.163845
6.10947	9.19554	0.686549	0.092593		6.10666	0.531319	0.532425		6.10947	0.105884	0.163731
6.11017	9.1961	0.686732	0.092365		6.10736	0.530945	0.532288		6.11017	0.106163	0.163697
6.11087	9.19672	0.687091	0.09196		6.10807	0.530876	0.532494		6.11087	0.106329	0.16348
6.11157	9.19738	0.687144	0.091632		6.10877	0.531013	0.532639		6.11157	0.106277	0.163311
6.11227	9.19818	0.687183	0.09183		6.10947	0.531151	0.531975		6.11227	0.106331	0.16337
6.11298	9.19917	0.687656	0.092334		6.11017	0.531067	0.532166		6.11298	0.106092	0.163449
6.11368	9.19977	0.687862	0.092143		6.11087	0.531624	0.532494		6.11368	0.105692	0.163581
6.11438	9.20048	0.687934	0.091884		6.11157	0.531578	0.532158		6.11438	0.105289	0.163674
6.11508	9.20151	0.688117	0.091922		6.11227	0.53212	0.53183		6.11508	0.104841	0.16366
6.11578	9.20225	0.688464	0.092578		6.11298	0.532326	0.532089		6.11578	0.104759	0.163927
6.11648	9.20281	0.68814	0.092982		6.11368	0.531784	0.531967		6.11648	0.104935	0.164051
6.11718	9.20327	0.687984	0.092975		6.11438	0.532036	0.53231		6.11718	0.104662	0.164101
6.11789	9.20384	0.687747	0.092952		6.11508	0.53196	0.53212		6.11789	0.104315	0.164071
6.11859	9.20446	0.687663	0.092494		6.11578	0.532066	0.532234		6.11859	0.104151	0.163692
6.11929	9.20536	0.687312	0.092395		6.11648	0.531914	0.532066		6.11929	0.104227	0.163614
6.11999	9.20608	0.68724	0.092792		6.11718	0.53231	0.531929		6.11999	0.104162	0.16371
6.12069	9.20691	0.687682	0.092723		6.11789	0.532181	0.531654		6.12069	0.104523	0.163762
6.12139	9.20779	0.687728	0.092654		6.11859	0.532257	0.531105		6.12139	0.105011	0.163472
6.12209	9.20856	0.687988	0.092448		6.11929	0.532219	0.531425		6.12209	0.10507	0.163298
6.12279	9.20921	0.688506	0.092853		6.11999	0.531937	0.531792		6.12279	0.105352	0.163417
6.1235	9.20972	0.688926	0.092395		6.12069	0.531975	0.531624		6.1235	0.10503	0.163829
6.1242	9.21049	0.689048	0.092403		6.12139	0.532127	0.531761		6.1242	0.104521	0.163992
6.1249	9.21109	0.688796	0.092639		6.12209	0.532425	0.532173		6.1249	0.104639	0.163381
6.1256	9.21143	0.688956	0.09296		6.12279	0.532288	0.532013		6.1256	0.104904	0.162953
6.1263	9.21225	0.689281	0.093143		6.1235	0.532494	0.53154		6.1263	0.104952	0.162659
6.127	9.21289	0.690067	0.093105		6.1242	0.532639	0.531845		6.127	0.105038	0.162301
6.1277	9.21363	0.690898	0.093402		6.1249	0.531975	0.531578		6.1277	0.105177	0.162303
6.12841	9.21424	0.691261	0.093417		6.1256	0.532166	0.531761		6.12841	0.105209	0.162454
6.12911	9.21513	0.691505	0.093654		6.1263	0.532494	0.531776		6.12911	0.105461	0.1624
6.12981	9.21551	0.691699	0.09418		6.127	0.532158	0.531868		6.12981	0.105965	0.162175
6.13051	9.21604	0.691745	0.094409		6.1277	0.53183	0.532661		6.13051	0.105903	0.161696
6.13121	9.21682	0.691142	0.094577		6.12841	0.532089	0.5326		6.13121	0.10589	0.16112
6.13191	9.21775	0.691337	0.094653		6.12911	0.531967	0.532326		6.13191	0.106397	0.160645
6.13261	9.21883	0.69131	0.094508		6.12981	0.53231	0.53228		6.13261	0.10655	0.160555
6.13332	9.21957	0.691444	0.094539		6.13051	0.53212	0.532173		6.13332	0.106113	0.160911
6.13402	9.22048	0.691055	0.094608		6.13121	0.532234	0.531937		6.13402	0.105753	0.160869
6.13472	9.22129	0.691039	0.095096		6.13191	0.532066	0.531044		6.13472	0.105667	0.160437
6.13542	9.22191	0.69136	0.094943		6.13261	0.531929	0.530518		6.13542	0.10552	0.160222
6.13612	9.22292	0.692382	0.095172		6.13332	0.531654	0.530571		6.13612	0.105656	0.160205
6.13682	9.22414	0.692439	0.095531		6.13402	0.531105	0.530167		6.13682	0.105772	0.160147
6.13752	9.22485	0.692954	0.095981		6.13472	0.531425	0.530144		6.13752	0.105942	0.160111
6.13823	9.22556	0.693187	0.096278		6.13542	0.531792	0.53022		6.13823	0.105945	0.159952
6.13893	9.2263	0.693122	0.096416		6.13612	0.531624	0.530609		6.13893	0.106043	0.159762
6.13963	9.2271	0.692916	0.096629		6.13682	0.531761	0.530319		6.13963	0.105936	0.159538
6.14033	9.22824	0.693221	0.096912		6.13752	0.532173	0.530823		6.14033	0.10589	0.159125
6.14103	9.22937	0.692973	0.097003		6.13823	0.532013	0.53096		6.14103	0.10552	0.158718
6.14173	9.23032	0.693145	0.097354		6.13893	0.53154	0.530853		6.14173	0.10511	0.158397
6.14243	9.23126	0.693931	0.097469		6.13963	0.531845	0.531525		6.14243	0.104942	0.158592
6.14314	9.23235	0.694152	0.097522		6.14033	0.531578	0.531601		6.14314	0.104671	0.159135
6.14384	9.23319	0.694801	0.097369		6.14103	0.531761	0.531372		6.14384	0.104585	0.159733
6.14454	9.23362	0.694701	0.096851		6.14173	0.531776	0.531052		6.14454	0.104589	0.159883
6.14524	9.23397	0.694732	0.096347		6.14243	0.531868	0.530922		6.14524	0.104751	0.159903
6.14594	9.23473	0.694205	0.095973		6.14314	0.532661	0.530495		6.14594	0.105066	0.160156
6.14664	9.23525	0.69453	0.095927		6.14384	0.5326	0.530457		6.14664	0.105059	0.160407
6.14734	9.23613	0.694793	0.096393		6.14454	0.532326	0.530876		6.14734	0.104914	0.160576
6.14804	9.23653	0.693973	0.096744		6.14524	0.53228	0.530884		6.14804	0.104997	0.160901
6.14875	9.23756	0.693832	0.096431		6.14594	0.532173	0.530563		6.14875	0.10539	0.161283
6.14945	9.23875	0.693629	0.096538		6.14664	0.531937	0.53067		6.14945	0.105718	0.161757
6.15015	9.23964	0.693622	0.096873		6.14734	0.531044	0.530983		6.15015	0.10585	0.162134
6.15085	9.24006	0.693244	0.096873		6.14804	0.530518	0.53112		6.15085	0.105984	0.162155
6.15155	9.24092	0.693256	0.096881		6.14875	0.530571	0.530869		6.15155	0.105926	0.162147
6.15225	9.2417	0.692847	0.096545		6.14945	0.530167	0.531136		6.15225	0.10598	0.162368
6.15295	9.24213	0.692954	0.095958		6.15015	0.530144	0.531158		6.15295	0.106253	0.162545
6.15366	9.24291	0.69321	0.095859		6.15085	0.53022	0.531517		6.15366	0.106668	0.163215
6.15436	9.24345	0.693885	0.095828		6.15155	0.530609	0.531357		6.15436	0.107052	0.163298
6.15506	9.24384	0.693259	0.095851		6.15225	0.530319	0.531006		6.15506	0.107427	0.162834
6.15576	9.24445	0.69279	0.096034		6.15295	0.530823	0.531021		6.15576	0.107334	0.162556
6.15646	9.24515	0.692489	0.095966		6.15366	0.53096	0.530937		6.15646	0.106987	0.163397
6.15716	9.24598	0.69202	0.09608		6.15436	0.530853	0.530853		6.15716	0.106939	0.164068
6.15786	9.24654	0.691745	0.095912		6.15506	0.531525	0.531189		6.15786	0.107147	0.164472
6.15857	9.24681	0.691585	0.095912		6.15576	0.531601	0.531548		6.15857	0.10787	0.164151
6.15927	9.24771	0.691249	0.095142		6.15646	0.531372	0.531372		6.15927	0.108692	0.163895
6.15997	9.24814	0.691505	0.095584		6.15716	0.531052	0.531517		6.15997	0.108993	0.164809
6.16067	9.24877	0.691402	0.095752		6.15786	0.530922	0.531448		6.16067	0.108702	0.165683
6.16137	9.24997	0.691482	0.096049		6.15857	0.530495	0.531342		6.16137	0.1087	0.166355
6.16207	9.25035	0.691234	0.095576		6.15927	0.530457	0.531143		6.16207	0.108717	0.166654
6.16277	9.25112	0.69091	0.095424		6.15997	0.530876	0.531471		6.16277	0.108517	0.167084
6.16348	9.25213	0.691123	0.095851		6.16067	0.530884	0.530914		6.16348	0.108476	0.167077
6.16418	9.25263	0.691478	0.09518		6.16137	0.530563	0.531479		6.16418	0.108291	0.166906
6.16488	9.25331	0.69176	0.09492		6.16207	0.53067	0.531456		6.16488	0.108246	0.166865
6.16558	9.25462	0.69152	0.095325		6.16277	0.530983	0.530518		6.16558	0.108677	0.166889
6.16628	9.25563	0.691741	0.095287		6.16348	0.53112	0.530731		6.16628	0.109112	0.167202
6.16698	9.25624	0.691589	0.094943		6.16418	0.530869	0.530869		6.16698	0.108723	0.167536
6.16768	9.25748	0.691753	0.094585		6.16488	0.531136	0.531158		6.16768	0.108776	0.168262
6.16838	9.25831	0.691653	0.094539		6.16558	0.531158	0.530807		6.16838	0.109331	0.168409
6.16909	9.25906	0.691795	0.094432		6.16628	0.531517	0.530251		6.16909	0.109869	0.168237
6.16979	9.2597	0.691997	0.094348		6.16698	0.531357	0.530365		6.16979	0.110136	0.168294
6.17049	9.26015	0.69173	0.094318		6.16768	0.531006	0.53054		6.17049	0.110367	0.168684
6.17119	9.26047	0.69128	0.094218		6.16838	0.531021	0.530479		6.17119	0.110113	0.169159
6.17189	9.26037	0.691249	0.094203		6.16909	0.530937	0.530281		6.17189	0.109522	0.169264
6.17259	9.26035	0.690936	0.093982		6.16979	0.530853	0.529961		6.17259	0.108724	0.169041
6.17329	9.26054	0.690883	0.093631		6.17049	0.531189	0.529831		6.17329	0.108232	0.169352
6.17399	9.26153	0.691062	0.093555		6.17119	0.531548	0.529488		6.17399	0.108242	0.169431
6.1747	9.26209	0.691211	0.093585		6.17189	0.531372	0.529404		6.1747	0.108383	0.169867
6.1754	9.26237	0.691074	0.093745		6.17259	0.531517	0.529198		6.1754	0.108505	0.170483
6.1761	9.26295	0.691478	0.093867		6.17329	0.531448	0.529091		6.1761	0.108677	0.170872
6.1768	9.26345	0.691428	0.093982		6.17399	0.531342	0.529144		6.1768	0.10897	0.171121
6.1775	9.26385	0.691154	0.09386		6.1747	0.531143	0.528694		6.1775	0.108373	0.170421
6.1782	9.26415	0.691138	0.093715		6.1754	0.531471	0.528748		6.1782	0.108002	0.170135
6.17891	9.2645	0.691013	0.0937		6.1761	0.530914	0.529015		6.17891	0.107982	0.169905
6.17961	9.26487	0.690685	0.093585		6.1768	0.531479	0.529488		6.17961	0.107687	0.169735
6.18031	9.26574	0.690246	0.094066		6.1775	0.531456	0.529602		6.18031	0.107757	0.169538
6.18101	9.26597	0.690192	0.094081		6.1782	0.530518	0.529564		6.18101	0.107405	0.169322
6.18171	9.26616	0.690257	0.094272		6.17891	0.530731	0.529495		6.18171	0.107279	0.169559
6.18241	9.26672	0.690005	0.0946		6.17961	0.530869	0.530014		6.18241	0.107145	0.169488
6.18311	9.26754	0.690093	0.094524		6.18031	0.531158	0.530525		6.18311	0.107151	0.168759
6.18382	9.26791	0.69036	0.094066		6.18101	0.530807	0.530876		6.18382	0.107157	0.168471
6.18452	9.26832	0.69041	0.094142		6.18171	0.530251	0.530945		6.18452	0.107487	0.167629
6.18522	9.26836	0.690681	0.093974		6.18241	0.530365	0.531036		6.18522	0.10758	0.167456
6.18592	9.26861	0.691161	0.093738		6.18311	0.53054	0.531044		6.18592	0.107704	0.167605
6.18662	9.26881	0.691653	0.094043		6.18382	0.530479	0.530945		6.18662	0.108007	0.167996
6.18732	9.26967	0.691634	0.093898		6.18452	0.530281	0.530746		6.18732	0.107868	0.168383
6.18802	9.27078	0.691829	0.093799		6.18522	0.529961	0.530762		6.18802	0.107767	0.168766
6.18872	9.27145	0.691859	0.094028		6.18592	0.529831	0.530479		6.18872	0.107574	0.168951
6.18942	9.27212	0.691653	0.093974		6.18662	0.529488	0.530754		6.18942	0.107246	0.169335
6.19013	9.27258	0.691295	0.093845		6.18732	0.529404	0.531006		6.19013	0.106817	0.16948
6.19083	9.273	0.69194	0.094119		6.18802	0.529198	0.531136		6.19083	0.106527	0.169762
6.19153	9.27347	0.692252	0.094264		6.18872	0.529091	0.531593		6.19153	0.106567	0.168885
6.19223	9.27412	0.692329	0.094272		6.18942	0.529144	0.531677		6.19223	0.10614	0.168548
6.19293	9.27457	0.692474	0.094257		6.19013	0.528694	0.531349		6.19293	0.10582	0.168572
6.19363	9.27533	0.692649	0.094318		6.19083	0.528748	0.530632		6.19363	0.105305	0.168962
6.19433	9.27577	0.692836	0.09444		6.19153	0.529015	0.530655		6.19433	0.104946	0.169561
6.19504	9.27621	0.692989	0.094875		6.19223	0.529488	0.530479		6.19504	0.104761	0.1688
6.19574	9.277	0.693271	0.095531		6.19293	0.529602	0.530342		6.19574	0.104769	0.168367
6.19644	9.27752	0.693145	0.095622		6.19363	0.529564	0.530304		6.19644	0.105156	0.167998
6.19714	9.27855	0.692554	0.095462		6.19433	0.529495	0.530113		6.19714	0.104923	0.168284
6.19784	9.27903	0.692805	0.095241		6.19504	0.530014	0.529793		6.19784	0.104814	0.168207
6.19854	9.27913	0.692836	0.09537		6.19574	0.530525	0.52977		6.19854	0.104748	0.168349
6.19925	9.27943	0.692405	0.095134		6.19644	0.530876	0.52961		6.19925	0.104832	0.168262
6.19995	9.27961	0.691924	0.095096		6.19714	0.530945	0.529755		6.19995	0.104839	0.168257
6.20065	9.27974	0.692096	0.095477		6.19784	0.531036	0.530365		6.20065	0.104925	0.168352
6.20135	9.2798	0.692485	0.095538		6.19854	0.531044	0.529953		6.20135	0.104566	0.16824
6.20205	9.27986	0.692886	0.094859		6.19925	0.530945	0.529335		6.20205	0.104471	0.167795
6.20275	9.28001	0.692989	0.094516		6.19995	0.530746	0.528091		6.20275	0.104544	0.167057
6.20345	9.28014	0.692294	0.094691		6.20065	0.530762	0.528145		6.20345	0.104317	0.166701
6.20415	9.28075	0.692096	0.094524		6.20135	0.530479	0.529083		6.20415	0.104065	0.166769
6.20486	9.28144	0.691718	0.09444		6.20205	0.530754	0.529259		6.20486	0.104053	0.166854
6.20556	9.28231	0.691489	0.094623		6.20275	0.531006	0.529434		6.20556	0.103947	0.166993
6.20626	9.2833	0.691478	0.09444		6.20345	0.531136	0.529358		6.20626	0.10383	0.166285
6.20696	9.28438	0.69123	0.094615		6.20415	0.531593	0.530098		6.20696	0.104231	0.166514
6.20766	9.2854	0.691238	0.095012		6.20486	0.531677	0.530327		6.20766	0.104725	0.166814
6.20836	9.28619	0.691352	0.095386		6.20556	0.531349	0.530136		6.20836	0.105057	0.166658
6.20906	9.2867	0.690761	0.095821		6.20626	0.530632	0.530556		6.20906	0.104755	0.166578
6.20976	9.28721	0.689952	0.095744		6.20696	0.530655	0.530853		6.20976	0.10441	0.166324
6.21047	9.28801	0.690097	0.095195		6.20766	0.530479	0.531242		6.21047	0.10438	0.166505
6.21117	9.28845	0.690559	0.094806		6.20836	0.530342	0.531143		6.21117	0.10457	0.16631
6.21187	9.28871	0.690288	0.094928		6.20906	0.530304	0.531242		6.21187	0.104742	0.166264
6.21257	9.28917	0.689784	0.094951		6.20976	0.530113	0.53154		6.21257	0.10544	0.166743
6.21327	9.2898	0.690177	0.095439		6.21047	0.529793	0.53109		6.21327	0.105825	0.166705
6.21397	9.29036	0.690074	0.09563		6.21117	0.52977	0.531036		6.21397	0.105841	0.166217
6.21467	9.29091	0.689773	0.095561		6.21187	0.52961	0.531105		6.21467	0.106399	0.166391
6.21538	9.29155	0.690192	0.095325		6.21257	0.529755	0.530968		6.21538	0.106449	0.16634
6.21608	9.29212	0.6907	0.094379		6.21327	0.530365	0.53093		6.21608	0.106209	0.166824
6.21678	9.29304	0.690749	0.094135		6.21397	0.529953	0.530922		6.21678	0.106056	0.166712
6.21748	9.2936	0.69065	0.094348		6.21467	0.529335	0.530434		6.21748	0.106487	0.166397
6.21818	9.29396	0.69004	0.094844		6.21538	0.528091	0.529686		6.21818	0.106605	0.166532
6.21888	9.29422	0.689849	0.095302		6.21608	0.528145	0.529289		6.21888	0.106344	0.166541
6.21959	9.29439	0.689677	0.095424		6.21678	0.529083	0.52948		6.21959	0.105362	0.167105
6.22029	9.2949	0.689792	0.095493		6.21748	0.529259	0.52951		6.22029	0.104835	0.166366
6.22099	9.29588	0.689727	0.095882		6.21818	0.529434	0.529305		6.22099	0.104544	0.165785
6.22169	9.29672	0.689372	0.096126		6.21888	0.529358	0.529396		6.22169	0.103739	0.164611
6.22239	9.2973	0.689204	0.095905		6.21959	0.530098	0.529633		6.22239	0.103735	0.163216
6.22309	9.29692	0.689349	0.095927		6.22029	0.530327	0.529724		6.22309	0.103508	0.162507
6.22379	9.29702	0.689182	0.096202		6.22099	0.530136	0.529755		6.22379	0.103258	0.161964
6.22449	9.29768	0.688995	0.096172		6.22169	0.530556	0.529778		6.22449	0.103109	0.161484
6.2252	9.29787	0.689544	0.096217		6.22239	0.530853	0.529617		6.2252	0.103205	0.161889
6.2259	9.29844	0.689716	0.096393		6.22309	0.531242	0.529549		6.2259	0.103359	0.16186
6.2266	9.29923	0.68962	0.096286		6.22379	0.531143	0.529243		6.2266	0.103273	0.161934
6.2273	9.29956	0.690116	0.096011		6.22449	0.531242	0.528824		6.2273	0.103311	0.161783
6.228	9.29978	0.690101	0.096072		6.2252	0.53154	0.528893		6.228	0.102808	0.162076
6.2287	9.30019	0.69015	0.096194		6.2259	0.53109	0.529129		6.2287	0.102497	0.162022
6.2294	9.30049	0.689815	0.096736		6.2266	0.531036	0.529182		6.2294	0.102093	0.161186
6.23011	9.30114	0.689849	0.096568		6.2273	0.531105	0.529449		6.23011	0.102047	0.161868
6.23081	9.30199	0.68967	0.09653		6.228	0.530968	0.529739		6.23081	0.102026	0.161791
6.23151	9.30247	0.689773	0.096469		6.2287	0.53093	0.530159		6.23151	0.101557	0.161572
6.23221	9.30262	0.690295	0.09679		6.2294	0.530922	0.530716		6.23221	0.10128	0.161509
6.23291	9.30287	0.69015	0.096812		6.23011	0.530434	0.531036		6.23291	0.100563	0.161544
6.23361	9.30372	0.689861	0.096919		6.23081	0.529686	0.530922		6.23361	0.09997	0.161508
6.23431	9.30463	0.689899	0.097003		6.23151	0.529289	0.530838		6.23431	0.099855	0.162495
6.23501	9.30532	0.690101	0.097232		6.23221	0.52948	0.53054		6.23501	0.100044	0.162294
6.23572	9.30573	0.689799	0.097408		6.23291	0.52951	0.530151		6.23572	0.099663	0.161863
6.23642	9.30619	0.689841	0.097362		6.23361	0.529305	0.530396		6.23642	0.099798	0.161495
6.23712	9.30711	0.689513	0.09724		6.23431	0.529396	0.531143		6.23712	0.100187	0.161434
6.23782	9.30793	0.689155	0.097202		6.23501	0.529633	0.532295		6.23782	0.099846	0.162028
6.23852	9.30857	0.689777	0.097591		6.23572	0.529724	0.532959		6.23852	0.099857	0.162493
6.23922	9.309	0.689883	0.098155		6.23642	0.529755	0.532845		6.23922	0.099687	0.162389
6.23993	9.30913	0.690673	0.098293		6.23712	0.529778	0.533173		6.23993	0.099676	0.162595
6.24063	9.30935	0.690795	0.098766		6.23782	0.529617	0.533493		6.24063	0.099851	0.16246
6.24133	9.30982	0.691024	0.098849		6.23852	0.529549	0.533852		6.24133	0.0998	0.16281
6.24203	9.31047	0.691222	0.098804		6.23922	0.529243	0.533867		6.24203	0.099295	0.162764
6.24273	9.3111	0.69099	0.098956		6.23993	0.528824	0.534279		6.24273	0.099108	0.163058
6.24343	9.31166	0.690643	0.099399		6.24063	0.528893	0.534531		6.24343	0.098963	0.16281
6.24413	9.31226	0.691196	0.099437		6.24133	0.529129	0.534462		6.24413	0.098873	0.162945
6.24483	9.31275	0.691787	0.099368		6.24203	0.529182	0.534355		6.24483	0.098549	0.163104
6.24554	9.31297	0.691982	0.09959		6.24273	0.529449	0.534325		6.24554	0.097984	0.162657
6.24624	9.3134	0.691982	0.100093		6.24343	0.529739	0.534966		6.24624	0.097965	0.163354
6.24694	9.31369	0.692622	0.100673		6.24413	0.530159	0.53521		6.24694	0.097893	0.1637
6.24764	9.31368	0.693454	0.101093		6.24483	0.530716	0.535172		6.24764	0.097593	0.163491
6.24834	9.31398	0.69374	0.101321		6.24554	0.531036	0.535599		6.24834	0.097517	0.163364
6.24904	9.31444	0.693881	0.101024		6.24624	0.530922	0.535919		6.24904	0.097378	0.163381
6.24974	9.31485	0.694907	0.100665		6.24694	0.530838	0.53537		6.24974	0.097076	0.163481
6.25045	9.31532	0.695239	0.100215		6.24764	0.53054	0.534912		6.25045	0.09666	0.163285
6.25115	9.31582	0.695277	0.100352		6.24834	0.530151	0.534752		6.25115	0.096639	0.163104
6.25185	9.31615	0.694961	0.100871		6.24904	0.530396	0.534935		6.25185	0.096218	0.162858
6.25255	9.31673	0.695308	0.101344		6.24974	0.531143	0.535446		6.25255	0.095819	0.162636
6.25325	9.31729	0.696197	0.101611		6.25045	0.532295	0.535629		6.25325	0.095716	0.163211
6.25395	9.3175	0.69646	0.101474		6.25115	0.532959	0.535858		6.25395	0.095629	0.163125
6.25465	9.31808	0.696849	0.101321		6.25185	0.532845	0.535515		6.25465	0.096241	0.162624
6.25535	9.31881	0.697112	0.101306		6.25255	0.533173	0.535049		6.25535	0.096346	0.163592
6.25606	9.31913	0.697082	0.101337		6.25325	0.533493	0.534615		6.25606	0.0963	0.164151
6.25676	9.31936	0.69736	0.10155		6.25395	0.533852	0.534309		6.25676	0.096351	0.164536
6.25746	9.31954	0.697585	0.101711		6.25465	0.533867	0.534119		6.25746	0.09638	0.165691
6.25816	9.3203	0.697261	0.101726		6.25535	0.534279	0.534187		6.25816	0.09662	0.165701
6.25886	9.32123	0.697822	0.102023		6.25606	0.534531	0.534264		6.25886	0.096279	0.165838
6.25956	9.3217	0.698051	0.10242		6.25676	0.534462	0.533897		6.25956	0.096245	0.166297
6.26027	9.32243	0.697887	0.10242		6.25746	0.534355	0.534279		6.26027	0.096498	0.166293
6.26097	9.32297	0.697578	0.102214		6.25816	0.534325	0.534813		6.26097	0.096271	0.166332
6.26167	9.32334	0.697574	0.102313		6.25886	0.534966	0.535027		6.26167	0.096201	0.167342
6.26237	9.32365	0.697433	0.102321		6.25956	0.53521	0.535141		6.26237	0.09614	0.167163
6.26307	9.32416	0.697593	0.102649		6.26027	0.535172	0.535225		6.26307	0.096594	0.166441
6.26377	9.3249	0.697425	0.102992		6.26097	0.535599	0.53524		6.26377	0.096947	0.165967
6.26447	9.32574	0.697822	0.10313		6.26167	0.535919	0.53537		6.26447	0.097092	0.165798
6.26517	9.32639	0.697906	0.102733		6.26237	0.53537	0.535294		6.26517	0.096397	0.165017
6.26588	9.32679	0.69791	0.102672		6.26307	0.534912	0.535034		6.26588	0.096687	0.165203
6.26658	9.32717	0.697761	0.103107		6.26377	0.534752	0.534889		6.26658	0.096531	0.16567
6.26728	9.32787	0.697517	0.10345		6.26447	0.534935	0.534897		6.26728	0.096395	0.165112
6.26798	9.32864	0.697837	0.103488		6.26517	0.535446	0.535179		6.26798	0.096987	0.164988
6.26868	9.32927	0.698146	0.103427		6.26588	0.535629	0.535797		6.26868	0.097307	0.165128
6.26938	9.32938	0.698383	0.103595		6.26658	0.535858	0.536003		6.26938	0.097166	0.164391
6.27008	9.32937	0.698608	0.1039		6.26728	0.535515	0.535843		6.27008	0.096893	0.164587
6.27079	9.32977	0.698653	0.103717		6.26798	0.535049	0.536057		6.27079	0.096844	0.164882
6.27149	9.33049	0.698661	0.103641		6.26868	0.534615	0.536339		6.27149	0.096647	0.165021
6.27219	9.33124	0.698547	0.103671		6.26938	0.534309	0.536407		6.27219	0.096073	0.165555
6.27289	9.33159	0.698802	0.104015		6.27008	0.534119	0.536667		6.27289	0.096332	0.164795
6.27359	9.33184	0.699161	0.104198		6.27079	0.534187	0.53717		6.27359	0.096258	0.164309
6.27429	9.33238	0.699596	0.10461		6.27149	0.534264	0.537369		6.27429	0.096428	0.1644
6.27499	9.33318	0.699702	0.104381		6.27219	0.533897	0.537521		6.27499	0.096165	0.163767
6.27569	9.33378	0.700301	0.104808		6.27289	0.534279	0.537643		6.27569	0.09572	0.163692
6.2764	9.33426	0.70045	0.104961		6.27359	0.534813	0.537651		6.2764	0.095642	0.163526
6.2771	9.33446	0.70042	0.105457		6.27429	0.535027	0.537445		6.2771	0.09622	0.163432
6.2778	9.33416	0.700523	0.105746		6.27499	0.535141	0.536926		6.2778	0.096092	0.163251
6.2785	9.33419	0.700683	0.105251		6.27569	0.535225	0.536827		6.2785	0.095814	0.163879
6.2792	9.33463	0.700813	0.104663		6.2764	0.53524	0.537048		6.2792	0.09547	0.163811
6.2799	9.33483	0.700721	0.104404		6.2771	0.53537	0.537003		6.2799	0.09563	0.163336
6.28061	9.33515	0.700935	0.10419		6.2778	0.535294	0.536919		6.28061	0.09589	0.163305
6.28131	9.33584	0.701156	0.103923		6.2785	0.535034	0.536751		6.28131	0.095577	0.16255
6.28201	9.33646	0.701019	0.103656		6.2792	0.534889	0.536873		6.28201	0.095442	0.162417
6.28271	9.33711	0.700626	0.103526		6.2799	0.534897	0.537346		6.28271	0.095095	0.162625
6.28341	9.3378	0.700618	0.103801		6.28061	0.535179	0.537567		6.28341	0.094927	0.162742
6.28411	9.33812	0.700507	0.104121		6.28131	0.535797	0.537376		6.28411	0.094892	0.163129
6.28481	9.33848	0.700389	0.103961		6.28201	0.536003	0.537445		6.28481	0.094438	0.162204
6.28551	9.33907	0.699691	0.104083		6.28271	0.535843	0.538086		6.28551	0.094438	0.162938
6.28622	9.3395	0.699722	0.104419		6.28341	0.536057	0.538948		6.28622	0.094181	0.162825
6.28692	9.3399	0.699905	0.10493		6.28411	0.536339	0.539413		6.28692	0.094108	0.162816
6.28762	9.34029	0.700118	0.104732		6.28481	0.536407	0.539383		6.28762	0.09396	0.163388
6.28832	9.34051	0.699897	0.104984		6.28551	0.536667	0.539398		6.28832	0.093773	0.163448
6.28902	9.34093	0.699611	0.105289		6.28622	0.53717	0.539375		6.28902	0.093902	0.163585
6.28972	9.34169	0.699863	0.105174		6.28692	0.537369	0.539749		6.28972	0.093517	0.163814
6.29042	9.34235	0.699062	0.105373		6.28762	0.537521	0.540329		6.29042	0.093386	0.163321
6.29113	9.34275	0.698428	0.1049		6.28832	0.537643	0.540833		6.29113	0.09309	0.163061
6.29183	9.34312	0.698444	0.105037		6.28902	0.537651	0.541176		6.29183	0.092707	0.163399
6.29253	9.34347	0.698478	0.105449		6.28972	0.537445	0.54113		6.29253	0.091842	0.163428
6.29323	9.34382	0.698718	0.10519		6.29042	0.536926	0.541374		6.29323	0.091297	0.164185
6.29393	9.34412	0.699027	0.105174		6.29113	0.536827	0.541641		6.29393	0.091652	0.164033
6.29463	9.34452	0.698806	0.105548		6.29183	0.537048	0.542053		6.29463	0.09161	0.163495
6.29533	9.34473	0.699195	0.105106		6.29253	0.537003	0.542191		6.29533	0.09095	0.163167
6.29603	9.34494	0.699729	0.104732		6.29323	0.536919	0.541473		6.29603	0.090303	0.163115
6.29674	9.34535	0.699973	0.10554		6.29393	0.536751	0.541321		6.29674	0.090158	0.162277
6.29744	9.3457	0.699828	0.10593		6.29463	0.536873	0.541702		6.29744	0.090193	0.162667
6.29814	9.34623	0.69995	0.105792		6.29533	0.537346	0.542015		6.29814	0.0898	0.163055
6.29884	9.34648	0.699912	0.105746		6.29603	0.537567	0.541878		6.29884	0.089704	0.163795
6.29954	9.34668	0.70021	0.105617		6.29674	0.537376	0.541512		6.29954	0.089691	0.163936
6.30024	9.34658	0.699748	0.105731		6.29744	0.537445	0.541588		6.30024	0.090189	0.164589
6.30094	9.34673	0.699798	0.106357		6.29814	0.538086	0.542015		6.30094	0.089676	0.16449
6.30165	9.34667	0.699966	0.106891		6.29884	0.538948	0.542191		6.30165	0.089601	0.164198
6.30235	9.34663	0.700008	0.107166		6.29954	0.539413	0.541962		6.30235	0.089578	0.164928
6.30305	9.34684	0.699817	0.10741		6.30024	0.539383	0.541679		6.30305	0.08976	0.165174
6.30375	9.34708	0.700107	0.107272		6.30094	0.539398	0.541496		6.30375	0.089714	0.165459
6.30445	9.3477	0.700023	0.107043		6.30165	0.539375	0.541824		6.30445	0.089935	0.165448
6.30515	9.3484	0.69992	0.106982		6.30235	0.539749	0.542053		6.30515	0.089958	0.1657
6.30585	9.34868	0.699626	0.106876		6.30305	0.540329	0.54216		6.30585	0.089651	0.165782
6.30656	9.34885	0.699748	0.107036		6.30375	0.540833	0.542305		6.30656	0.089802	0.166286
6.30726	9.34867	0.700053	0.107394		6.30445	0.541176	0.542404		6.30726	0.090635	0.166707
6.30796	9.3488	0.700214	0.107501		6.30515	0.54113	0.542343		6.30796	0.090374	0.167678
6.30866	9.34949	0.700084	0.107333		6.30585	0.541374	0.54187		6.30866	0.090244	0.167576
6.30936	9.34994	0.699889	0.107242		6.30656	0.541641	0.541916		6.30936	0.090395	0.168076
6.31006	9.34998	0.699947	0.107272		6.30726	0.542053	0.541748		6.31006	0.090486	0.168342
6.31076	9.34972	0.699653	0.107028		6.30796	0.542191	0.541039		6.31076	0.0902	0.168638
6.31147	9.35005	0.699001	0.106586		6.30866	0.541473	0.540733		6.31147	0.090498	0.168754
6.31217	9.35057	0.698928	0.105945		6.30936	0.541321	0.54068		6.31217	0.090088	0.16848
6.31287	9.35104	0.699046	0.105479		6.31006	0.541702	0.541107		6.31287	0.089729	0.168851
6.31357	9.35168	0.699165	0.10509		6.31076	0.542015	0.541252		6.31357	0.089378	0.168003
6.31427	9.35172	0.69939	0.10509		6.31147	0.541878	0.540962		6.31427	0.089435	0.167665
6.31497	9.3521	0.699405	0.105495		6.31217	0.541512	0.540924		6.31497	0.089275	0.167642
6.31567	9.35229	0.700031	0.105449		6.31287	0.541588	0.541237		6.31567	0.089624	0.16795
6.31637	9.35223	0.700008	0.105624		6.31357	0.542015	0.541428		6.31637	0.089352	0.16874
6.31708	9.35245	0.699645	0.10538		6.31427	0.542191	0.541512		6.31708	0.088438	0.169027
6.31778	9.35276	0.699454	0.104999		6.31497	0.541962	0.541626		6.31778	0.088198	0.169168
6.31848	9.35279	0.699256	0.104755		6.31567	0.541679	0.541702		6.31848	0.087995	0.169084
6.31918	9.35325	0.699218	0.104655		6.31637	0.541496	0.542076		6.31918	0.08749	0.169145
6.31988	9.35363	0.698875	0.104213		6.31708	0.541824	0.542511		6.31988	0.087971	0.169533
6.32058	9.3536	0.698775	0.104587		6.31778	0.542053	0.543045		6.32058	0.08785	0.168646
6.32128	9.35356	0.699058	0.104716		6.31848	0.54216	0.542801		6.32128	0.087959	0.168824
6.32199	9.35392	0.69884	0.104129		6.31918	0.542305	0.542717		6.32199	0.08811	0.168696
6.32269	9.3539	0.698936	0.103664		6.31988	0.542404	0.542679		6.32269	0.088375	0.168458
6.32339	9.354	0.699157	0.103519		6.32058	0.542343	0.542931		6.32339	0.088367	0.168259
6.32409	9.35421	0.699413	0.103008		6.32128	0.54187	0.543205		6.32409	0.08851	0.168279
6.32479	9.35436	0.699622	0.10271		6.32199	0.541916	0.543015		6.32479	0.088777	0.168521
6.32549	9.35449	0.699847	0.102359		6.32269	0.541748	0.543068		6.32549	0.088814	0.168234
6.32619	9.35471	0.70037	0.101917		6.32339	0.541039	0.54348		6.32619	0.088844	0.167945
6.3269	9.35527	0.700313	0.101764		6.32409	0.540733	0.543762		6.3269	0.088798	0.168542
6.3276	9.35582	0.700126	0.101482		6.32479	0.54068	0.544388		6.3276	0.089283	0.168735
6.3283	9.35601	0.699947	0.100963		6.32549	0.541107	0.544823		6.3283	0.089123	0.168253
6.329	9.35633	0.700069	0.100612		6.32619	0.541252	0.544861		6.329	0.089033	0.168337
6.3297	9.35644	0.700038	0.100612		6.3269	0.540962	0.544884		6.3297	0.089081	0.168991
6.3304	9.35691	0.699981	0.100826		6.3276	0.540924	0.545044		6.3304	0.088514	0.169897
6.3311	9.35731	0.699798	0.101009		6.3283	0.541237	0.54586		6.3311	0.089409	0.170034
6.33181	9.35752	0.699756	0.101276		6.329	0.541428	0.546371		6.33181	0.089084	0.170173
6.33251	9.35801	0.700111	0.101718		6.3297	0.541512	0.54631		6.33251	0.089331	0.170282
6.33321	9.35828	0.70008	0.101596		6.3304	0.541626	0.546677		6.33321	0.089975	0.170081
6.33391	9.35856	0.700221	0.101428		6.3311	0.541702	0.547012		6.33391	0.089723	0.169925
6.33461	9.35887	0.700275	0.101794		6.33181	0.542076	0.547752		6.33461	0.089666	0.170388
6.33531	9.35941	0.700389	0.101909		6.33251	0.542511	0.548103		6.33531	0.0895	0.17056
6.33601	9.36007	0.700694	0.102512		6.33321	0.543045	0.54789		6.33601	0.089992	0.171101
6.33671	9.36075	0.70087	0.102794		6.33391	0.542801	0.547745		6.33671	0.089647	0.171219
6.33742	9.36142	0.700908	0.10239		6.33461	0.542717	0.547974		6.33742	0.089502	0.170938
6.33812	9.36148	0.700988	0.102229		6.33531	0.542679	0.548248		6.33812	0.08943	0.171003
6.33882	9.36192	0.70079	0.101848		6.33601	0.542931	0.548401		6.33882	0.089319	0.17061
6.33952	9.36182	0.700584	0.101527		6.33671	0.543205	0.548416		6.33952	0.088737	0.17084
6.34022	9.36193	0.700515	0.101802		6.33742	0.543015	0.548531		6.34022	0.088133	0.17072
6.34092	9.36262	0.700477	0.101627		6.33812	0.543068	0.548622		6.34092	0.088602	0.170913
6.34162	9.3633	0.700561	0.101382		6.33882	0.54348	0.548584		6.34162	0.088501	0.170651
6.34233	9.3637	0.700549	0.101566		6.33952	0.543762	0.548714		6.34233	0.087869	0.170508
6.34303	9.36382	0.700397	0.101764		6.34022	0.544388	0.548759		6.34303	0.08733	0.169725
6.34373	9.36359	0.700553	0.101909		6.34092	0.544823	0.548935		6.34373	0.087246	0.169708
6.34443	9.36344	0.700801	0.102031		6.34162	0.544861	0.549103		6.34443	0.087004	0.169646
6.34513	9.3634	0.700935	0.102061		6.34233	0.544884	0.549507		6.34513	0.086731	0.169945
6.34583	9.36453	0.701129	0.101901		6.34303	0.545044	0.550117		6.34583	0.086969	0.169756
6.34653	9.36531	0.701408	0.101443		6.34373	0.54586	0.550652		6.34653	0.086874	0.169768
6.34724	9.36497	0.701785	0.10181		6.34443	0.546371	0.550957		6.34724	0.087284	0.169727
6.34794	9.36547	0.702052	0.102359		6.34513	0.54631	0.550934		6.34794	0.088442	0.169436
6.34864	9.36573	0.702289	0.10274		6.34583	0.546677	0.551201		6.34864	0.08901	0.169703
6.34934	9.36584	0.702422	0.103099		6.34653	0.547012	0.551735		6.34934	0.089184	0.169693
6.35004	9.36604	0.702781	0.103305		6.34724	0.547752	0.551979		6.35004	0.08935	0.169879
6.35074	9.36639	0.702766	0.103603		6.34794	0.548103	0.55204		6.35074	0.088737	0.169789
6.35144	9.36661	0.702293	0.103748		6.34864	0.54789	0.552353		6.35144	0.089029	0.169252
6.35215	9.36695	0.70209	0.104053		6.34934	0.547745	0.552498		6.35215	0.08946	0.168262
6.35285	9.36719	0.702361	0.104358		6.35004	0.547974	0.552071		6.35285	0.090013	0.167884
6.35355	9.36798	0.702686	0.104724		6.35074	0.548248	0.551872		6.35355	0.090553	0.168194
6.35425	9.36828	0.702731	0.104892		6.35144	0.548401	0.551788		6.35425	0.091329	0.167748
6.35495	9.3683	0.70288	0.1048		6.35215	0.548416	0.551476		6.35495	0.09082	0.167434
6.35565	9.36865	0.703246	0.10464		6.35285	0.548531	0.550758		6.35565	0.090988	0.168586
6.35635	9.36929	0.703246	0.104381		6.35355	0.548622	0.550583		6.35635	0.091362	0.168795
6.35705	9.36965	0.703166	0.104083		6.35425	0.548584	0.550621		6.35705	0.09178	0.168833
6.35776	9.37021	0.703109	0.104175		6.35495	0.548714	0.550682		6.35776	0.092079	0.168913
6.35846	9.37101	0.702884	0.104922		6.35565	0.548759	0.550667		6.35846	0.092642	0.169276
6.35916	9.3712	0.702609	0.104984		6.35635	0.548935	0.550888		6.35916	0.092621	0.169004
6.35986	9.37163	0.702537	0.105434		6.35705	0.549103	0.551445		6.35986	0.092613	0.169315
6.36056	9.37202	0.70285	0.105807		6.35776	0.549507	0.551598		6.36056	0.092937	0.170074
6.36126	9.37237	0.702968	0.105869		6.35846	0.550117	0.551514		6.36126	0.092853	0.170877
6.36196	9.3727	0.703056	0.106212		6.35916	0.550652	0.551521		6.36196	0.093563	0.170328
6.36267	9.37295	0.703254	0.106685		6.35986	0.550957	0.551247		6.36267	0.093599	0.169903
6.36337	9.3733	0.703052	0.106937		6.36056	0.550934	0.550667		6.36337	0.094047	0.169999
6.36407	9.37345	0.702705	0.107127		6.36126	0.551201	0.550552		6.36407	0.093941	0.169982
6.36477	9.37385	0.702617	0.107791		6.36196	0.551735	0.550743		6.36477	0.093777	0.169178
6.36547	9.37431	0.70264	0.108493		6.36267	0.551979	0.550652		6.36547	0.094513	0.168699
6.36617	9.37459	0.702731	0.108707		6.36337	0.55204	0.5504		6.36617	0.09444	0.168854
6.36687	9.37495	0.70238	0.10844		6.36407	0.552353	0.550171		6.36687	0.095045	0.169081
6.36758	9.37501	0.701865	0.108401		6.36477	0.552498	0.550377		6.36758	0.094663	0.169496
6.36828	9.37501	0.701846	0.108409		6.36547	0.552071	0.550415		6.36828	0.094395	0.169632
6.36898	9.37506	0.701953	0.108043		6.36617	0.551872	0.550667		6.36898	0.094868	0.169446
6.36968	9.37514	0.701881	0.108112		6.36687	0.551788	0.550758		6.36968	0.094822	0.16931
6.37038	9.37517	0.701591	0.108424		6.36758	0.551476	0.550316		6.37038	0.094745	0.168962
6.37108	9.37532	0.70119	0.108226		6.36828	0.550758	0.550186		6.37108	0.09458	0.168718
6.37178	9.37525	0.700717	0.107883		6.36898	0.550583	0.550362		6.37178	0.094442	0.169148
6.37249	9.37527	0.700542	0.10731		6.36968	0.550621	0.550323		6.37249	0.094448	0.169387
6.37319	9.37547	0.700832	0.106761		6.37038	0.550682	0.5504		6.37319	0.094238	0.169374
6.37389	9.37576	0.701175	0.106898		6.37108	0.550667	0.551147		6.37389	0.094425	0.169434
6.37459	9.37626	0.701053	0.106837		6.37178	0.550888	0.551491		6.37459	0.094982	0.169795
6.37529	9.37664	0.700732	0.106975		6.37249	0.551445	0.552048		6.37529	0.094856	0.169812
6.37599	9.37689	0.70053	0.106937		6.37319	0.551598	0.552086		6.37599	0.095049	0.1697
6.37669	9.37692	0.700404	0.107005		6.37389	0.551514	0.551949		6.37669	0.095234	0.169623
6.37739	9.37709	0.70066	0.107043		6.37459	0.551521	0.551788		6.37739	0.095575	0.169273
6.3781	9.37773	0.700488	0.106677		6.37529	0.551247	0.552048		6.3781	0.096367	0.169659
6.3788	9.37802	0.70045	0.106479		6.37599	0.550667	0.552071		6.3788	0.096336	0.170144
6.3795	9.37874	0.699985	0.106517		6.37669	0.550552	0.551773		6.3795	0.096693	0.170067
6.3802	9.37945	0.699527	0.106113		6.37739	0.550743	0.551811		6.3802	0.096998	0.169984
6.3809	9.37973	0.699302	0.106746		6.3781	0.550652	0.55175		6.3809	0.096678	0.169993
6.3816	9.37959	0.699084	0.106929		6.3788	0.5504	0.551758		6.3816	0.096672	0.170121
6.3823	9.37942	0.699126	0.107593		6.3795	0.550171	0.552452		6.3823	0.096636	0.170703
6.38301	9.37957	0.699283	0.107761		6.3802	0.550377	0.552948		6.38301	0.096056	0.171009
6.38371	9.37978	0.699115	0.10773		6.3809	0.550415	0.553185		6.38371	0.096386	0.171012
6.38441	9.38007	0.698943	0.107532		6.3816	0.550667	0.553062		6.38441	0.096578	0.171052
6.38511	9.3804	0.698619	0.107455		6.3823	0.550758	0.553123		6.38511	0.096371	0.171361
6.38581	9.38067	0.698474	0.10731		6.38301	0.550316	0.553185		6.38581	0.096636	0.17101
6.38651	9.3812	0.698493	0.106982		6.38371	0.550186	0.553101		6.38651	0.096376	0.170744
6.38721	9.38158	0.698791	0.106715		6.38441	0.550362	0.553001		6.38721	0.096466	0.171255
6.38791	9.38133	0.699187	0.106807		6.38511	0.550323	0.55323		6.38791	0.096479	0.171618
6.38862	9.3811	0.699355	0.106845		6.38581	0.5504	0.553421		6.38862	0.09659	0.171103
6.38932	9.3812	0.699691	0.106403		6.38651	0.551147	0.5532		6.38932	0.096386	0.170885
6.39002	9.38143	0.699592	0.106242		6.38721	0.551491	0.553871		6.39002	0.096042	0.171645
6.39072	9.38173	0.699504	0.106586		6.38791	0.552048	0.554344		6.39072	0.095854	0.171461
6.39142	9.38234	0.699313	0.106754		6.38862	0.552086	0.554634		6.39142	0.09547	0.17168
6.39212	9.38223	0.699138	0.106776		6.38932	0.551949	0.554771		6.39212	0.095674	0.172194
6.39283	9.382	0.698672	0.106967		6.39002	0.551788	0.554893		6.39283	0.095192	0.172467
6.39353	9.38191	0.698821	0.10728		6.39072	0.552048	0.554802		6.39353	0.094417	0.172073
6.39423	9.38177	0.698814	0.107333		6.39142	0.552071	0.554703		6.39423	0.094045	0.171919
6.39493	9.38195	0.698737	0.107112		6.39212	0.551773	0.554657		6.39493	0.093586	0.171748
6.39563	9.38155	0.698161	0.107364		6.39283	0.551811	0.554413		6.39563	0.093132	0.17195
6.39633	9.38184	0.697505	0.107234		6.39353	0.55175	0.554146		6.39633	0.093138	0.171801
6.39703	9.38198	0.697322	0.107227		6.39423	0.551758	0.554459		6.39703	0.092871	0.171992
6.39773	9.38261	0.69728	0.107036		6.39493	0.552452	0.554688		6.39773	0.092769	0.172011
6.39844	9.38236	0.697044	0.106891		6.39563	0.552948	0.555267		6.39844	0.092859	0.172163
6.39914	9.38271	0.697276	0.106601		6.39633	0.553185	0.555099		6.39914	0.092752	0.172059
6.39984	9.383	0.697604	0.106601		6.39703	0.553062	0.555161		6.39984	0.092489	0.172508
6.40054	9.38323	0.697639	0.106265		6.39773	0.553123	0.555695		6.40054	0.092159	0.17221
6.40124	9.38307	0.697601	0.106059		6.39844	0.553185	0.555862		6.40124	0.092174	0.171526
[truncated: 23,670 more rows]

## Sheet: Fig. 2d
Fig. 2d - PYK2KFL 728-839 vs CaM - Ca2++							Fig. 2d - PYK2KFL 728-839 vs CaM - EGTA							Fig. 2d - PYK2KFL 761-839 vs CaM				Fig. 2d - FAKKFL 776-841 vs CaM
Microscale Thermophoresis							Microscale Thermophoresis							Microscale Thermophoresis				Microscale Thermophoresis
Kd	Concentr.	Unbound	Bound	Fit Values	Dose Response		Kd	Concentr.	Unbound	Bound	Fit Values	Dose Response		Concentration (nM)	Response	Err-Values		Concentration (nM)	Response	Err-Values
690	50	897.48	918.95	1	897.512		10500	50	796.39	869.49	1	796.395		6.1035	844.925	0.154078		6.1035	859.739	0.335989
Concentration (nM)	Response	Err-Values		1.153	897.516		Concentration (nM)	Response	Err-Values		1.153	796.396		12.207	843.982	0.177209		12.207	857.097	0.687616
3.052	897.527	0.455138		1.33	897.521		3.052	786.436	1.23864		1.33	796.397		24.4141	842.91	0.226388		24.4141	856.543	0.473971
6.104	895.538	0.953139		1.535	897.527		6.104	798.711	0.836896		1.535	796.398		48.8281	841.666	0.301557		48.8281	859.101	0.693291
12.207	899.867	0.502968		1.77	897.534		12.207	788.783	1.27139		1.77	796.4		97.6563	845.572	0.279224		97.6563	860.893	0.53877
24.414	897.102	0.36441		2.042	897.541		24.414	790.188	1.64482		2.042	796.402		195.312	843.398	0.26427		195.312	859.028	0.542332
48.828	899.252	0.186314		2.355	897.55		48.828	800.492	1.32306		2.355	796.404		390.625	843.675	0.307709		390.625	859.027	0.400858
97.656	898.714	0.51765		2.716	897.56		97.656	801.071	1.3093		2.716	796.406		781.25	844.161	0.277987		781.25	860.207	0.529548
195.312	905.536	0.277454		3.133	897.572		195.312	798.575	1.2737		3.133	796.409		1562.5	844.356	0.319008		1562.5	860.244	0.686273
390.625	904.354	0.218011		3.614	897.586		390.625	801.415	1.58825		3.614	796.413		3125	844.685	0.130279		3125	862.093	0.470563
781.25	907.236	0.653907		4.169	897.601		781.25	806.601	1.32065		4.169	796.417		6250	843.672	0.154227		6250	862.723	0.688039
1562.5	912.137	0.874584		4.808	897.619		1562.5	816.645	1.58536		4.808	796.421		12500	845.653	0.0879907		12500	861.429	0.856642
3125	915.345	0.679833		5.546	897.64		3125	812.538	0.761965		5.546	796.426		25000	843.75	0.272323		25000	863.802	0.85308
6250	915.986	0.920088		6.397	897.664		6250	822.469	0.773225		6.397	796.432		50000	843.29	0.225933		50000	863.546	0.87587
12500	920.802	1.06229		7.379	897.691		12500	833.63	0.950459		7.379	796.439		100000	843.866	0.583424		100000	863.307	0.945005
25000	912.693	0.886163		8.511	897.723		25000	843.116	0.873417		8.511	796.447		200000	842.785	0.845962		200000	864.947	0.933848
50000	918.863	1.06315		9.817	897.759		50000	856.678	0.802953		9.817	796.456
100000	922.003	1.63148		11.324	897.801		100000	866.411	1.03175		11.324	796.466
				13.062	897.849						13.062	796.478
				15.066	897.904						15.066	796.492
				17.378	897.967						17.378	796.508
				20.045	898.04						20.045	796.526
				23.121	898.123						23.121	796.548
				26.669	898.218						26.669	796.572
				30.761	898.326						30.761	796.6
				35.481	898.45						35.481	796.633
				40.926	898.591						40.926	796.671
				47.206	898.752						47.206	796.714
				54.45	898.934						54.45	796.764
				62.806	899.141						62.806	796.821
				72.444	899.374						72.444	796.887
				83.56	899.637						83.56	796.963
				96.383	899.931						96.383	797.051
				111.173	900.261						111.173	797.151
				128.233	900.628						128.233	797.267
				147.911	901.035						147.911	797.4
				170.608	901.483						170.608	797.553
				196.789	901.974						196.789	797.729
				226.986	902.508						226.986	797.93
				261.818	903.086						261.818	798.161
				301.995	903.705						301.995	798.426
				348.337	904.364						348.337	798.728
				401.791	905.059						401.791	799.074
				463.447	905.784						463.447	799.469
				534.564	906.534						534.564	799.919
				616.595	907.302						616.595	800.432
				711.214	908.079						711.214	801.013
				820.352	908.858						820.352	801.672
				946.237	909.63						946.237	802.416
				1091.44	910.388						1091.44	803.254
				1258.92	911.123						1258.92	804.196
				1452.11	911.829						1452.11	805.25
				1674.94	912.502						1674.94	806.423
				1931.97	913.136						1931.97	807.726
				2228.43	913.729						2228.43	809.162
				2570.4	914.279						2570.4	810.739
				2964.83	914.786						2964.83	812.459
				3419.79	915.249						3419.79	814.321
				3944.57	915.671						3944.57	816.325
				4549.88	916.052						4549.88	818.463
				5248.07	916.394						5248.07	820.725
				6053.41	916.701						6053.41	823.098
				6982.32	916.975						6982.32	825.563
				8053.78	917.218						8053.78	828.101
				9289.66	917.434						9289.66	830.688
				10715.2	917.625						10715.2	833.297
				12359.5	917.793						12359.5	835.903
				14256.1	917.94						14256.1	838.478
				16443.7	918.07						16443.7	840.999
				18967.1	918.184						18967.1	843.441
				21877.6	918.283						21877.6	845.785
				25234.8	918.371						25234.8	848.014
				29107.2	918.447						29107.2	850.116
				33573.8	918.513						33573.8	852.081
				38725.8	918.571						38725.8	853.905
				44668.4	918.621						44668.4	855.585
				51522.9	918.665						51522.9	857.123
				59429.2	918.703						59429.2	858.522
				68548.8	918.736						68548.8	859.788
				79067.9	918.765						79067.9	860.928
				91201.1	918.79						91201.1	861.95
				105196	918.812						105196	862.863
				121339	918.831						121339	863.674
				139959	918.847						139959	864.394
				161436	918.862						161436	865.031
				186209	918.874						186209	865.593
				214783	918.885						214783	866.087
				247742	918.894						247742	866.521
				285759	918.902						285759	866.902
				329610	918.909						329610	867.236
				380189	918.915						380189	867.528
				438531	918.92						438531	867.783
				505825	918.925						505825	868.005
				583445	918.929						583445	868.199
				672977	918.932						672977	868.368
				776247	918.935						776247	868.515
				895365	918.938						895365	868.643
				1.03276e+06	918.94						1.03276e+06	868.755

## Sheet: Fig. 3
Fig. 3c - PYK2KFL 728-839 vs PYK2KFL728-839							Fig. 3d - FAKKFL 776-841 vs FAKKFL776-841							Fig. 3e - MBP-PYK2KFL 728-839 vs PYK2KFL 728-839					Fig. 3f - MBP-FAKKFL 776-841 vs FAKKFL 776-841
Microscale Thermophoresis							Microscale Thermophoresis							Flouresence Anisotropy					Flouresence Anisotropy
Kd	Concentr.	Unbound	Bound	Fit Values	Dose Response		Kd	Concentr.	Unbound	Bound	Fit Values	Dose Response		Conc (nM)	Mean	Err-Values			Conc (nM)	Mean	Err-Values
709	50	921.466	924.371	93303.3	924.349		848	50	792.09	804.92	10	792.236		50000	0.95	0.0141421			50000	0.956667	0.0159474
				87055.1	924.348						11.272	792.254		25000	0.966667	0.010304			25000	0.966667	0.010304
Concentration (nM)	Response	Err-Values		81225.2	924.346						12.706	792.274		12500	0.94	0.0163299			12500	0.94	0.0163299
3.05175	0.0488592	0.00489405		75785.8	924.344		Concentration (nM)	Response	Err-Values		14.322	792.296		6250	0.91	0.0163299			6250	0.91	0.0163299
6.1035	-0.0799759	0.21643		70710.7	924.342		9.1555	791.093	0.365478		16.144	792.321		3125	0.866667	0.0204275			3125	0.866667	0.0204275
12.207	0.0307632	0.101392		65975.4	924.34		18.31	791.418	0.488658		18.197	792.35		1565	0.68	0.0124722			1565	0.743333	0.0204275
24.4141	0.0287565	0.069495		61557.2	924.338		36.621	793.932	0.600657		20.512	792.381		780	0.513333	0.0245452			780	0.54	0.0326599
48.8281	-0.0513615	0.131228		57434.9	924.335		73.242	795.776	0.842643		23.121	792.417		390	0.413333	0.0196889			390	0.386667	0.0174978
97.6563	0.205172	0.0828282		53588.7	924.333		146.484	796.706	0.609781		26.062	792.457		195	0.29	0.00942809			195	0.29	0.00942809
195.312	0.231896	0.0468004		50000	924.33		292.969	795.954	0.801979		29.376	792.502		97.5	0.183333	0.0136987			97.5	0.183333	0.0136987
390.625	0.468997	0.0681671		46651.6	924.327		585.938	798.375	0.378487		33.113	792.552		48	0.13	0.0163299			48	0.13	0.0163299
781.25	0.522688	0.131333		43527.5	924.324		1171.88	801.64	0.28678		37.325	792.608
1562.5	0.640908	0.11911		40612.6	924.321		2343.75	803.457	0.666289		42.073	792.67
3125	0.79315	0.139283		37892.9	924.317		4687.5	803.913	1.00635		47.424	792.74
6250	0.770133	0.0745807		35355.3	924.313		9375	804.631	0.590218		53.456	792.818
12500	0.642748	0.0528428		32987.7	924.309		18750	804.012	0.864182		60.256	792.904
25000	1.01603	0.0406815		30778.6	924.305		37500	804.136	0.943582		67.92	793
50000	1.10879	0.120392		28717.5	924.3		75000	804.689	0.883286		76.56	793.107
100000	1.22036	0.172389		26794.3	924.295		150000	805.957	0.515113		86.298	793.225
				25000	924.29						97.275	793.355
				23325.8	924.284						109.648	793.498
				21763.8	924.278						123.595	793.656
				20306.3	924.272						139.316	793.829
				18946.4	924.265						157.036	794.018
				17677.7	924.258						177.011	794.224
				16493.8	924.25						199.526	794.447
				15389.3	924.241						224.905	794.688
				14358.7	924.233						253.513	794.947
				13397.2	924.223						285.759	795.224
				12500	924.213						322.107	795.519
				11662.9	924.202						363.078	795.832
				10881.9	924.191						409.261	796.161
				10153.1	924.179						461.318	796.505
				9473.22	924.166						519.996	796.862
				8838.83	924.152						586.138	797.231
				8246.92	924.138						660.693	797.609
				7694.65	924.122						744.732	797.994
				7179.36	924.106						839.46	798.382
				6698.58	924.089						946.237	798.772
				6250	924.071						1066.6	799.159
				5831.45	924.051						1202.26	799.542
				5440.94	924.031						1355.19	799.917
				5076.57	924.009						1527.57	800.282
				4736.61	923.987						1721.87	800.635
				4419.41	923.963						1940.89	800.974
				4123.46	923.938						2187.76	801.297
				3847.32	923.912						2466.04	801.604
				3589.68	923.884						2779.71	801.893
				3349.29	923.855						3133.29	802.164
				3125	923.825						3531.83	802.416
				2915.73	923.793						3981.07	802.651
				2720.47	923.76						4487.45	802.868
				2538.29	923.726						5058.25	803.068
				2368.3	923.69						5701.64	803.251
				2209.71	923.653						6426.88	803.418
				2061.73	923.615						7244.36	803.571
				1923.66	923.575						8165.82	803.71
				1794.84	923.534						9204.5	803.836
				1674.64	923.492						10375.3	803.949
				1562.5	923.449						11695	804.052
				1457.86	923.404						13182.6	804.145
				1360.23	923.359						14859.4	804.228
				1269.14	923.312						16749.4	804.303
				1184.15	923.265						18879.9	804.37
				1104.85	923.216						21281.4	804.43
				1030.86	923.167						23988.3	804.484
				961.83	923.118						27039.6	804.532
				897.42	923.068						30479	804.575
				837.322	923.017						34355.8	804.613
				781.249	922.967						38725.8	804.647
				728.931	922.916						43651.6	804.678
				680.117	922.865						49204	804.705
				634.571	922.815						55462.6	804.729
				592.076	922.764						62517.3	804.751
				552.426	922.714						70469.3	804.77
				515.432	922.665						79432.8	804.787
				480.915	922.616						89536.5	804.802
				448.71	922.568						100925	804.815
				418.661	922.52						113763	804.827
				390.624	922.474						128233	804.838
				364.466	922.428						144544	804.848
				340.058	922.384						162930	804.856
				317.286	922.341						183654	804.863
				296.038	922.299						207014	804.87
				276.213	922.258						233346	804.876
				257.716	922.218						263027	804.881
				240.458	922.18						296483	804.886
				224.355	922.143						334195	804.89
				209.33	922.108						376704	804.894
				195.312	922.073						424620	804.897
				182.233	922.041						478630	804.9
				170.029	922.009						539511	804.902
				158.643	921.979						608135	804.904
				148.019	921.95						685488	804.906
				138.107	921.923						772681	804.908
				128.858	921.897						870964	804.91
				120.229	921.872						981748	804.911
				112.177	921.848						1.10662e+06	804.913
				104.665	921.826						1.24738e+06	804.914
				97.6561	921.804						1.40605e+06	804.915
				91.1163	921.784
				85.0146	921.765
				79.3214	921.747
				74.0095	921.729
				69.0533	921.713
				64.429	921.698
				60.1144	921.684
				56.0887	921.67
				52.3326	921.657
				48.828	921.645
				45.5582	921.634
				42.5073	921.623
				39.6607	921.613
				37.0047	921.604
				34.5266	921.595
				32.2145	921.587
				30.0572	921.579
				28.0443	921.572
				26.1663	921.565
				24.414	921.558
				22.7791	921.552
				21.2536	921.547
				19.8303	921.541
				18.5024	921.536
				17.2633	921.532
				16.1072	921.528
				15.0286	921.523
				14.0222	921.52
				13.0831	921.516
				12.207	921.513
				11.3895	921.51
				10.6268	921.507
				9.91517	921.504
				9.25118	921.502
				8.63165	921.499
				8.05362	921.497
				7.51429	921.495
				7.01108	921.493
				6.54157	921.491
				6.1035	921.49
				5.69477	921.488
				5.31341	921.487
				4.95758	921.485
				4.62559	921.484
				4.31583	921.483
				4.02681	921.482
				3.75715	921.481
				3.50554	921.48
				3.27078	921.479
				3.05175	921.478

## Sheet: Fig. 4
Fig. 4b - Top			Fig. 4b - Bottom				Fig. 4d
Residue Number	CSPi		Residue number	Intensity Ratio			Residue number	Intensity Ratio
				Mean	SD			Mean	SD
728	0.0114237		728	1.33333	0.0210929		728	0.910454	0.00969217
729	0		729	1.4	0.0211664		729	0.909748	0.00962993
730	0.00498999		730	1.1405	0.0212389		730	0.908853	0.00965309
731	0.00401248		731	1.11911	0.0213217		731	0.908914	0.00970621
732	0.0063561		732	1.16908	0.0213941		732	0.909036	0.00976118
734	0.0077201		734	1.12583	0.0214554		734	0.909091	0.00981775
735	0.0117303		735	1.24828	0.0215017		735	0.909103	0.00987503
736	0		736				736	0.908894	0.0099332
737	0		737				737	0.904615	0.00999193
738	0.0089666		738	1.13619	0.0215321		738	0.909008	0.00878181
739	0		739				739	0.909031	0.00883557
741	0.00330151		741	1.16667	0.0215453		741	0.909299	0.00889049
742	0		742	1.52381	0.0215365		742	0.9104	0.00894292
743	0.00298329		743	1.18801	0.0215007		743	0.90913	0.00887162
744	0.0056921		744	1.11828	0.0215315		744	0.908701	0.00892861
745	0		745	1.5	0.0215392		745	0.911676	0.00897801
746	0.00407431		746	1.02128	0.0215223		746	0.908137	0.00850948
747	0		747				747	0.910246	0.00850391
749	0.0218197		749	1.47368	0.0215671		749	0.908969	0.00844211
750	0.00214476		750	1.13462	0.0216069		750	0.908938	0.00850033
751	0.0102029		751	1.28244	0.0216957		751	0.908617	0.00855944
752	0.00306594		752	1.25984	0.0217667		752	0.909271	0.00860674
754	0.00910494		754	1.16895	0.0218266		754	0.909091	0.00866377
755	0.0044833		755	1.02381	0.0218696		755	0.909006	0.00872684
756	0.00212132		756	1.07143	0.0218833		756	0.908934	0.0087917
758	0.00434741		758	1.10526	0.0218848		758	0.909091	0.0088574
760	0.00591608		760	1.00775	0.021859		760	0.909038	0.00892486
761	0.00607454		761				761	0.909586	0.00899429
762	0		762	1.25	0.0217941		762	0.910429	0.00903694
763	0		763				763	0.907321	0.00892732
764	0.0063561		764	1.24444	0.0217165		764	0.908864	0.00873855
765	0.00214476		765	1.17241	0.0215917		765	0.909091	0.00880883
768	0.00869483		768	1.03356	0.021409		768	0.90927	0.00888267
769	0.0177651		769	1.34146	0.0211455		769	0.908963	0.00895271
770	0		770				770
771	0		771				771
772	0		772				772
773	0		773				773	0.90894	0.00903065
774	0		774				774	0.908921	0.00911036
775	0.0122229		775	1.19774	0.0208265		775	0.909222	0.00919189
776	0.00849117		776	1.12195	0.020467		776	0.908408	0.00927235
777	0		777				777
778	0		778		0.0199837		778	0.910076	0.00932163
779	0		779				779	0.908339	0.00929518
780	0.00330151		780	1.20567	0.0193488		780	0.908929	0.00933853
781	0.00434741		781	1.19149	0.0195634		781	0.909229	0.0094306
782	0.00617252		782	1.12941	0.0197919		782	0.909025	0.00952157
783	0.00490918		783	0.997135	0.0200341		783	0.908942	0.00962023
784	0.0103392		784	1.11175	0.0202889		784	0.909028	0.00972142
785	0		785	1.14478	0.0205523		785	0.908953	0.00982651
786	0.00464758		786	1.17572	0.0208282		786	0.909158	0.00993463
788	0		788				788
789	0		789				789
790	0		790				790
791	0		791				791
792	0		792				792
793	0		793				793	0.907452	0.0100446
794	0.00577927		794	1.21429	0.0211137		794	0.909202	0.00987069
795	0		795	0.965517	0.0214049		795	0.907626	0.00998471
796	0.00730753		796	1.30579	0.0216991		796	0.909159	0.00985309
797	0.0007746		797	1.21212	0.022018		797	0.909091	0.00997471
798	0		798				798	0.903798	0.0101018
799	0.0110182		799	1.08772	0.0223538		799	0.909207	0.00542876
800	0		800	1	0.0226961		800	0.908977	0.00550162
801	0.00262679		801	1.21973	0.0230405		801	0.908897	0.00556304
802	0.00289828		802	1.27103	0.0234087		802	0.909149	0.00561454
803	0.0138564		803	1.27607	0.0237742		803	0.909259	0.00569478
804	0.0123531		804	1.24444	0.0241469		804	0.909091	0.00578022
805	0		805				805	0.909149	0.00586443
806	0		806	0.761905	0.0245295		806	0.908846	0.00595619
807	0.0107191		807	1.28889	0.0249044		807	0.909369	0.00601074
808	0.0209786		808	1.35519	0.0253377		808	0.908831	0.00610946
809	0.00853815		809	1.22481	0.0257828		809	0.909219	0.00616599
810	0		810				810	0.909348	0.00627859
811	0		811	1.09677	0.0261115		811	0.909241	0.00639592
812	0		812				812	0.909251	0.00652247
813	0		813				813
814	0.00173205		814	1.2012	0.0264832		814	0.90891	0.00665694
815	0		815				815	0.912343	0.00675901
816	0		816				816	0.908865	0.00176713
817	0.0132891		817	1.26482	0.0269313		817	0.909159	0.00170023
818	0		818				818	0.909195	0.00174219
819	0		819				819	0.909243	0.0017849
820	0.00525357		820	1.07177	0.0274606		820	0.909321	0.00182055
821	0.00232379		821	1.25413	0.0280051		821	0.909197	0.00182296
822	0.0106489		822	1.17895	0.0286449		822	0.90898	0.0018729
823	0.00899444		823	1.24514	0.02933		823	0.909091	0.00189
824	0.0179332		824	1.29577	0.0301574		824	0.909139	0.00195083
825	0		825	1.07914	0.0310652		825	0.909091	0.00202433
826	0.00434741		826	1.21406	0.0318555		826	0.909206	0.00209999
827	0.0067897		827	1.08738	0.0328853		827	0.909091	0.00218693
828	0.00941276		828	1.31765	0.034072		828	0.908838	0.00228587
829	0.00727324		829	1.00592	0.0356065		829	0.909267	0.00214291
830	0.00490918		830	0.968889	0.0365176		830	0.908961	0.00225215
832	0.00667083		832	1.10949	0.037666		832	0.909042	0.00224873
833	0.00927901		833	1	0.0384887		833	0.909218	0.00232517
834	0.0114237		834	1.05319	0.0401847		834	0.908983	0.00254681
835	0.00721803		835	1.1462	0.0420098		835	0.909159	0.00251563
836	0.00379473		836	1.26316	0.0451254		836	0.909583	0.00280568
837	0.00586515		837	1.08961	0.0518231		837	0.908953	0.00257819
838	0.0119206		838	1.27273	0.0634211		838	0.909468	0.00179533
839	0.00404969		839	0.943925	0.0365847		839	0.909215	0.00225659

## Sheet: Fig. 5
Fig. 5a			Fig. 5c			Fig. 5e			Fig. 5g
PYK2KFL 728-839 - Residue Number	CSPi		PYK2KFL 728-839 - Residue Number	CSPi		CaM EGTA - Residue Number	CSPi		CaM Ca2++ - Residue Number	I0.5/I0	I2/I0	I4/I0
728	0.018924		728			3	0.00247		2
729	0.006641		729			4	0.006678		3	0.150914	0.047141	0.009341
730	0.015511		730	0.00495		5	0.0121		4
731	0.034101		731			6	0.005292		5	0.105827	0.042659	-0.01676
732	0.026332		732	0.216531		7	0.007273		6	0.164312	0.042369	-0.00782
734			734	0.023182		8	0.001449		7	0.145466	0.055264	0.032194
735	0.070607		735			9	0.005865		8	0.297042	0.076807	0.044616
736	0.020271		736			10	0.002627		9	0.355357	0.129392	0.088417
737	0.012669		737			11	0.002025		10	0.197764	0.101006	0.037338
738	0.002898		738	0.017989		12	0.002214		11
739	0.002933		739			13	0.016793		12	0.140655	-0.033	-0.02101
741	0.002898		741	0.026165		14	0.008031		13	0.105063	0.05215	0.030724
742	0.002324		742	0.04296		15	0.014021		14	0.178315	0.060388	0.045695
743	0.007099		743	0.01745		16	0.002646		15	0.271869	0.097411	0.066564
744			744			17	0.005422		16	0.177727	0.044996	-0.03193
745	0.004796		745	0.097072		18	0.00247		17	0.203582	0.06864	0.011399
746	0.007589		746	0.018149		19	0.000949		18	-0.10944	-0.05338	-0.01456
747	0.000632		747	0.009829		20	0.005736		19	0.209383	-0.02173	0.022058
749	0.004171		749	0.016568		21	0.004012		20	-0.19745	-0.210634	-0.33599
750	0.004743		750	0.041164		22	0.004171		21	0.310905	0.051905	0.043937
751	0.002846		751	0.054616		23	0.00324		22	0.147526	0.034393	-0.01637
752	0.002025		752	0.014564		24	0.019611		23	0.265837	0.086329	0.063351
754	0.004483		754	0.022147		25	0.002933		24	0.038157	0.028262	0.020065
755	0.014546		755			26	0.001581		25	0.271122	0.079963	0.059197
756			756			27	0.006008		26	0.058785	0.02519	0.011038
758	0.00355		758			28	0.009241		27	0.129064	-0.04566	-0.03247
760	0.006603		760	0.017407		29	0.008654		28	0.319546	0.040696	-0.02804
761	0.002324		761	0.020163		30	0.002145		29	0.152933	-0.11146	-0.173501
762	0.002025		762	0.004626		31	0.007218		30	0.053561	0.02335	0.005613
763	0.002933		763			32	0.00405		31	0.165638	0.049853	0.005597
764			764			33	0.001183		32	-0.03137	-0.01685	-0.034289
765	0.020135		765			34	0.003808		33	0.100167	-0.04318	-0.11864
768	0.007106		768			35	0.001549		34	0.161753	-0.03575	-0.037124
769	0.006173		769			36	0.004733		35	0.040142	0.037567	0.002763
770			770			37	0.006356		36	-0.02596	-0.034849	-0.03883
771	0.023238		771	0.023946		38	0.007273		37	0.155416	0.085593	-0.01435
772	0.010973		772			39	0.002214		38	0.198947	0.065148	-0.0099
773	0.070607		773	0.049433		40	0.001897		39	0.159463	0.026183	0.001171
774	0.002933		774			41	0.001703		40	0.262404	-0.07243	-0.02015
775	0.064965		775			42	0.000707		41	0.210018	0.048751	0.03733
776			776			43	0.002898		42	0.177386	0.050974	-0.01362
777	0.001897		777	0.002646		45	0.004483		43	0.256221	0.056205	0.044148
778	0.019657		778			46	0.002933		45	0.229864	-0.02363	-0.050421
779	0.012037		779	0.00992		47	0.002025		46	0.211155	0.031111	-0.02754
780			780			48	0.014471		47	0.163011	0.062448	0.024666
781			781			49	0.008396		48	0.18612	0.023765	-0.01697
782	0.025786		782	0.071653		50	0.006325		49
783	0.009638		783	0.040557		51	0.007355		50
784	0.004347		784	0.022392		52	0.003592		51	0.185147	0.08039	0.031105
785	0.004796		785	0.048465		53	0.00386		52	0.069146	0.037158	0.014067
786	0.01283		786	0.00812		54	0.001183		53	0.124488	0.066125	-0.0275
788	0.000632		788	0.017309		55	0.002324		54	0.153347	0.058151	0.031336
789	0.005559		789			56	0.012985		55	0.170555	0.046501	0.005045
790			790			57	0.001732		56	-0.17299	-0.0826	-0.083096
791	0.012733		791			58	0.00355		57	0.104448	0.029198	-0.00403
792			792			59	0.009105		58	0.12324	-0.04148	-0.045077
793	0.064965		793			60	0.001581		59	0.276393	0.067495	0.018217
794			794			61	0.0107		60	0.301962	0.091388	0.073341
795	0.012526		795			62			61	0.302979	0.120432	0.095881
796	0.034101		796	0.01338		63			62	0.041302	0.021046	-0.06737
797			797			64	0.002121		63	0.307146	0.072812	0.065535
798	0.020271		798			65	0.022893		64	0.185694	0.096723	-0.03788
799			799			66			65	0.092433	0.020134	-0.08003
800	0.015277		800			68	0.005109		66	0.312394	0.06645	-0.06075
801			801			69	0.000707		68
802			802			70	0.006356		69	0.165612	0.081736	0.071396
803	0.007099		803			71	0.008798		70	0.194139	0.049741	0.009856
804			804			72	0.003755		71	0.150205	-0.3018	-0.082533
805	0.012223		805	0.008496		73	0.001897		72
806			806			74	0.002025		73	0.201119	0.107237	0.02841
807			807			75	0.004074		74	0.354678	0.098266	0.086463
808			808			76	0.004111		75	-0.10098	-0.02493	-0.030135
809			809			77	0.004347		76	-0.15875	-0.0776	-0.04295
810			810			78	0.001549		77	0.179074	0.104047	0.014451
811	0.002366		811	0.04815		79	0.004012		78	0.037731	0.049819	0.043027
812			812			80	0.008343		79	0.190469	0.044507	0.033159
813			813			81	0.017129		80	0.325777	0.068745	0.065064
814	0.012037		814			82	0.010144		81	0.296206	0.077429	0.058236
815			815	0.01671		83	0.010844		82	0.125689	0.043858	0.024454
816	0.009295		816			84	0.040548		83	0.132168	-0.02164	-0.026717
817	0.00772		817			85	0.002121		84	0.167854	0.042372	0.030297
818			818			86	0.002846		85	0.306208	0.109715	0.074971
819	0.012669		819			87	0.001897		86	0.195218	-0.03272	-0.126355
820			820			88	0.004012		87	0.493161	0.165083	0.110067
821			821	0.114642		89	0.001703		88
822	0.007106		822			90			89	0.13299	0.12851	0.108276
823	0.103783		823	0.019186		91			90	0.255353	0.068373	-0.01197
824			824			92	0.002846		91	0.09253	0.055623	0.033292
825	0.008031		825			93	0.011091		92	0.203522	0.046758	0.004429
826	0.014509		826			94	0.024391		93	-0.32006	-0.07902	-0.095513
827	0.02071		827			95	0.001897		94	0.05849	0.022634	-0.01889
828	0.017476		828			96	0.004347		95	0.144811	0.018648	0.005208
829	0.009252		829	0.038725		97	0.002145		96	0.237717	0.079443	0.067985
830	0.007804		830	0.023812		98	0.004483		97	0.211703	0.045819	-0.00464
832			832			99			98	0.276423	0.094549	0.063781
833	0.006325		833	0.031191		100	0.000316		99	0.18102	0.039046	0.018876
834	0.010719		834	0.063596		101			100	0.330723	0.054355	0.046746
835	0.034101		835			102			101	0.02309	0.012942	-0.01786
836	0.005523		836	0.020313		103	0.023128		102	0.187043	0.097425	-0.03816
837	0.002145		837	0.036852		104	0.000707		103	0.14233	0.041182	-0.03125
838	0.001581		838	0.01502		105	0.001897		104
839	0.000316		839	0.005422		106	0.000775		105	0.078838	-0.01849	-0.01178
						107			106	0.256619	0.087654	-0.04797
						108	0.003464		107	0.153347	0.058151	0.031336
						109	0.019922		108	0.182573	0.039997	0.01761
						110			109	0.121797	0.060222	0.030007
						111	0.006173		110	0.1182	0.07593	0.038289
						112	0.009721		111	0.130322	0.087933	-0.03875
						113	0.012744		112	0.23204	0.212638	-0.16837
						114	0.00324		113	0.097429	0.046283	0.002285
						115	0.031529		114	0.210018	0.048751	0.03733
						116	0.026171		115	0.17619	0.023039	0.019376
						117	0.004111		116	0.252843	0.062497	0.04902
						118			117	0.114424	0.018537	-0.02226
						119	0.00788		118	0.299802	-0.01274	-0.00803
						120	0.043914		119	0.401548	0.110275	0.106975
						121	0.01497		120
						122	0.007273		121	0.201964	0.04718	0.012854
						123	0.002646		122
						124	0.002627		123	-0.01183	-0.024442	-0.04419
						125			124	0.072225	-0.01209	-0.02907
						126			125	0.205686	0.045395	-0.00278
						127	0.00386		126	0.125218	0.052613	0.006034
						128	0.004347		127	0.23162	0.106044	0.040311
						129	0.004111		128	0.061838	0.051809	-0.00369
						130	0.002025		129	0.07391	0.030963	0.014509
						131	0.009487		130	0.352186	0.088378	0.079487
						132			131	0.161847	-0.01606	-0.03852
						133	0.007099		132	0.320842	0.057708	0.033799
						134	0.002627		133	0.304253	0.092081	0.073897
						135	0.00355		134	0.236541	0.06703	0.041526
						136			135	0.036482	0.01304	-0.006251
						137			136	0.19759	0.059306	0.019135
						138	0.007576		137	0.258646	0.056718	0.044919
						139			138	0.310409	0.069168	-0.0546
						140			139	0.07406	0.04147	0.01027
						141	0.000949		140	0.17491	0.076167	0.06064
						142	0.026573		141	0.452492	0.117001	0.067964
						143	0.00998		142	0.178044	0.01718	-0.02529
						144	0.006325		143	0.104348	0.09462	0.089533
						145	0.002366		144	0.132287	-0.06349	-0.00064
						146	0.006197		145	0.097387	0.088415	0.055354
						147			146	0.124019	0.06761	-0.06098
						148	0.00386		147	0.133002	0.064944	0.04275
						149	0.004648		148	0.058597	0.027045	-0.00029
									149	0.172722	0.02939	0.015631

## Sheet: Fig. 6a
					Fig. 6a
				boxes indicate cropped part in Fig. 6a
			Vehicle			Calmidazolium (Cz)
		pPyk2 GFP/total	Control	K+		Control	K+
			62.012	140.466		100.974	113.939
			137.988	335.458		96.2125	86.8611
		Mean	100	237.962		98.5931	100.4
			Vehicle			Calmidazolium (Cz)
			Control	K+		Control	K+
		pPyk2/total	52.3177	115.778		89.6857	87.9818
			147.682	291.765		77.8153	56.5155
		Mean	100	203.772		83.7505	72.2486

## Sheet: Fig. 6b
Fig. 6b - PYK2KFL 728-839 vs PYK2KFL 728-839-CaM:Ca2++							Fig. 6b - MBP-PYK2KFL 728-839 vs PYK2KFL 728-839-CaM:Ca2++						Fig. 6b - PYK2KFL 728-839:PYK2KFL 728-839-CaM:EGTA							Fig. 6b - MBP-PYK2KFL 728-839 vs PYK2KFL 728-839-CaM:EGTA
Microscale Thermophoresis							Flouresence Anisotropy						Microscale Thermophoresis							Flouresence Anisotropy
Kd	Concentr.	Unbound	Bound	Fit Values	Dose Response		Conc (nM)	Mean	Err-Values				Kd	Concentr.	Unbound	Bound	Fit Values	Dose Response		Conc (nM)	Mean	Err-Values
351	50	908.65	914.01	0.5	908.658		50000	0.926667	0.0193091				1080	50	892.73	923.99	0.5	892.732		50000	0.963333	0.0166296
Concentration (nM)	Response	Err-Values		0.5635	908.66		25000	0.963333	0.0113312				Concentration (nM)	Response	Err-Values		0.5635	892.733		25000	0.92	0.0141421
2.136	908.582	0.455138		0.6355	908.662		12500	0.91	0.0286744				4.272	890.311	1.23864		0.6355	892.734		12500	0.93	0.0368179
4.272	908.097	0.953139		0.716	908.664		6250	0.906667	0.0369518				8.545	891.702	0.836896		0.716	892.735		6250	0.926667	0.0326976
8.545	908.817	0.502968		0.807	908.666		3125	0.906667	0.0245452				17.09	892.181	1.27139		0.807	892.736		3125	0.84	0.0326599
17.09	909.093	0.36441		0.91	908.669		1565	0.86	0.0244949				34.18	893.933	1.64482		0.91	892.737		1565	0.673333	0.0530781
34.18	909.745	0.186314		1.0255	908.672		780	0.66	0.0286744				68.359	894.355	1.32306		1.0255	892.739		780	0.523333	0.0408551
68.359	908.918	0.51765		1.156	908.675		390	0.52	0.020548				136.719	894.894	1.3093		1.156	892.741		390	0.4	0.0262467
136.719	910.153	0.277454		1.303	908.679		195	0.413333	0.0196889				273.438	894.84	1.2737		1.303	892.743		195	0.283333	0.0196889
273.438	911.265	0.218011		1.469	908.683		97.5	0.2	0.0974109				546.875	896.475	1.58825		1.469	892.745		97.5	0.196667	0.020608
546.875	911.914	0.653907		1.6555	908.688		48	0.21	0.0326599				1093.75	898.537	1.32065		1.6555	892.747		48	0.203333	0.0408551
1093.75	912.258	0.874584		1.8665	908.694								2187.5	902.967	1.58536		1.8665	892.75
2187.5	912.551	0.679833		2.1035	908.7								4375	907.543	0.761965		2.1035	892.753
4375	914.114	0.920088		2.371	908.707								8750	913.049	0.773225		2.371	892.757
17500	913.239	1.06229		2.673	908.714								17500	916.238	0.950459		2.673	892.761
35000	913.975	0.886163		3.013	908.723								35000	920.267	0.873417		3.013	892.765
70000	914.786	1.06315		3.396	908.733								70000	922.823	0.802953		3.396	892.77
				3.828	908.744												3.828	892.776
				4.315	908.756												4.315	892.782
				4.8635	908.77												4.8635	892.789
				5.4825	908.786												5.4825	892.797
				6.1795	908.803												6.1795	892.807
				6.966	908.823												6.966	892.817
				7.852	908.844												7.852	892.828
				8.8505	908.869												8.8505	892.841
				9.9765	908.896												9.9765	892.856
				11.2455	908.926												11.2455	892.873
				12.6755	908.96												12.6755	892.891
				14.288	908.998												14.288	892.912
				16.1055	909.04												16.1055	892.936
				18.154	909.086												18.154	892.963
				20.463	909.138												20.463	892.992
				23.066	909.195												23.066	893.026
				26	909.258												26	893.064
				29.307	909.327												29.307	893.107
				33.0345	909.402												33.0345	893.154
				37.2365	909.485												37.2365	893.208
				41.973	909.575												41.973	893.268
				47.312	909.672												47.312	893.336
				53.33	909.778												53.33	893.412
				60.113	909.891												60.113	893.497
				67.7595	910.012												67.7595	893.593
				76.3785	910.141												76.3785	893.7
				86.0935	910.277												86.0935	893.819
				97.0445	910.42												97.0445	893.953
				109.388	910.569												109.388	894.103
				123.302	910.724												123.302	894.269
				138.986	910.883												138.986	894.455
				156.665	911.046												156.665	894.661
				176.591	911.211												176.591	894.891
				199.054	911.377												199.054	895.145
				224.373	911.543												224.373	895.426
				252.912	911.707												252.912	895.737
				285.082	911.868												285.082	896.079
				321.344	912.025												321.344	896.455
				362.218	912.177												362.218	896.867
				408.291	912.322												408.291	897.317
				460.225	912.462												460.225	897.807
				518.764	912.594												518.764	898.339
				584.75	912.718												584.75	898.912
				659.129	912.835												659.129	899.529
				742.968	912.943												742.968	900.189
				837.471	913.044												837.471	900.892
				943.995	913.137												943.995	901.636
				1064.07	913.223												1064.07	902.42
				1199.42	913.301												1199.42	903.24
				1351.98	913.373												1351.98	904.094
				1523.95	913.438												1523.95	904.975
				1717.79	913.497												1717.79	905.88
				1936.29	913.551												1936.29	906.803
				2182.58	913.599												2182.58	907.736
				2460.2	913.643												2460.2	908.674
				2773.13	913.682												2773.13	909.61
				3125.86	913.718												3125.86	910.536
				3523.47	913.75												3523.47	911.447
				3971.64	913.778												3971.64	912.337
				4476.82	913.803												4476.82	913.2
				5046.26	913.826												5046.26	914.032
				5688.14	913.847												5688.14	914.828
				6411.65	913.865												6411.65	915.585
				7227.2	913.881												7227.2	916.301
				8146.48	913.895												8146.48	916.975
				9182.69	913.908												9182.69	917.606
				10350.7	913.92												10350.7	918.194
				11667.3	913.93												11667.3	918.739
				13151.3	913.939												13151.3	919.242
				14824.2	913.947												14824.2	919.704
				16709.8	913.954												16709.8	920.129
				18835.2	913.961												18835.2	920.516
				21231	913.967												21231	920.869
				23931.5	913.972												23931.5	921.19
				26975.5	913.976												26975.5	921.48
				30406.8	913.98												30406.8	921.743
				34274.4	913.984												34274.4	921.98
				38634	913.987												38634	922.194
				43548.2	913.99												43548.2	922.386
				49087.4	913.992												49087.4	922.558
				55331.2	913.994												55331.2	922.713
				62369.2	913.996												62369.2	922.852
				70302.4	913.998												70302.4	922.976

## Sheet: Fig. 6c
Fig. 6c - PYK2KFL728-839 vs PYK2FERM-kinase35-683
Microscale Thermophoresis
Kd	Concentr.	Unbound	Bound	Fit Value	Dose Response
1170	50	918	895	46651.7	895.82
Concentration (nM)	Response	Err-Values		43527.5	895.859
1.5259	0.0545731	0.0104252		40612.6	895.9
3.0518	0.02479	0.0156447		37892.9	895.944
6.1035	0.0245034	0.0306639		35355.4	895.991
12.207	0.0293989	0.0229703		32987.7	896.041
24.4141	-0.000268874	0.00366678		30778.6	896.094
48.8281	0.0376038	0.00716089		28717.5	896.152
97.6563	0.0485495	0.0239088		26794.4	896.212
195.312	0.102941	0.0299525		25000	896.277
390.625	0.198065	0.0326621		23325.8	896.346
781.25	0.362945	0.029194		21763.8	896.42
1562.5	0.584394	0.044404		20306.3	896.498
3125	0.806912	0.0476157		18946.5	896.581
6250	0.931775	0.0152854		17677.7	896.67
12500	0.945999	0.00271956		16493.9	896.764
25000	0.915295	0.0250926		15389.3	896.864
50000	0.892986	0.0474676		14358.8	896.971
				13397.2	897.083
				12500	897.203
				11662.9	897.33
				10881.9	897.464
				10153.2	897.606
				9473.25	897.755
				8838.86	897.914
				8246.94	898.081
				7694.67	898.257
				7179.38	898.443
				6698.6	898.638
				6250.02	898.843
				5831.47	899.058
				5440.96	899.283
				5076.59	899.519
				4736.63	899.766
				4419.43	900.023
				4123.48	900.291
				3847.34	900.57
				3589.69	900.86
				3349.3	901.16
				3125.01	901.47
				2915.74	901.791
				2720.48	902.122
				2538.3	902.463
				2368.32	902.812
				2209.72	903.17
				2061.74	903.536
				1923.67	903.909
				1794.85	904.29
				1674.65	904.675
				1562.51	905.066
				1457.87	905.462
				1360.24	905.86
				1269.15	906.261
				1184.16	906.663
				1104.86	907.065
				1030.87	907.467
				961.837	907.867
				897.425	908.265
				837.328	908.66
				781.254	909.049
				728.936	909.434
				680.122	909.813
				634.576	910.185
				592.08	910.549
				552.43	910.905
				515.436	911.253
				480.919	911.591
				448.713	911.92
				418.664	912.238
				390.628	912.547
				364.468	912.845
				340.061	913.132
				317.288	913.408
				296.04	913.674
				276.215	913.929
				257.718	914.173
				240.46	914.407
				224.357	914.63
				209.332	914.843
				195.314	915.046
				182.234	915.239
				170.031	915.422
				158.644	915.596
				148.02	915.762
				138.108	915.918
				128.859	916.066
				120.23	916.207
				112.178	916.339
				104.666	916.464
				97.6571	916.582
				91.1173	916.693
				85.0154	916.798
				79.3222	916.897
				74.0102	916.99
				69.054	917.078
				64.4297	917.16
				60.115	917.237
				56.0893	917.31
				52.3332	917.378
				48.8286	917.442
				45.5587	917.502
				42.5078	917.558
				39.6611	917.611
				37.0052	917.66
				34.527	917.706
				32.2149	917.75
				30.0575	917.79
				28.0447	917.828
				26.1666	917.864
				24.4143	917.897
				22.7794	917.929
				21.2539	917.958
				19.8306	917.985
				18.5026	918.01
				17.2635	918.034
				16.1074	918.057
				15.0288	918.077
				14.0223	918.097
				13.0833	918.115
				12.2072	918.132
				11.3897	918.148
				10.627	918.163
				9.9153	918.177
				9.25131	918.19
				8.63177	918.202
				8.05373	918.213
				7.5144	918.224
				7.01118	918.234
				6.54166	918.243
				6.10359	918.251
				5.69485	918.259
				5.31348	918.267
				4.95766	918.274
				4.62566	918.28
				4.31589	918.286
				4.02687	918.292
				3.7572	918.298
				3.50559	918.302
				3.27083	918.307
				3.0518	918.311
				2.84743	918.315
				2.65674	918.319
				2.47883	918.323
				2.31283	918.326
				2.15795	918.329
				2.01344	918.332
				1.8786	918.335
				1.7528	918.337
				1.63542	918.339
				1.5259	918.342
